# Supplementary material for: Excess S-adenosylmethionine inhibits methylation via catabolism to adenine
Source: Commun Biol. 2022 Apr 5;5:313. doi: 10.1038/s42003-022-03280-5 (PMC8983724; doi:10.1038/s42003-022-03280-5)
Supplement: Supplementary file 4 — Supplementary Data 1 [file 42003_2022_3280_MOESM4_ESM.xlsx]

## Sheet: Absolute Concentration
Absolute Concentration of 116 Compounds
ID	HMT DB				Concentration (pmol/mm^3)															Comparative Analysis
	Compound name	Pathway Label	KEGG ID	HMDB ID	control			no-met			1mM-SAM			control		no-met		1mM-SAM		no-met vs control			1mM-SAM vs control			1mM-SAM vs no-met
					1	2	3	4	5	6	7	8	9	Mean	S.D.	Mean	S.D.	Mean	S.D.	Ratio ¶	p-value ||		Ratio ¶	p-value ||		Ratio ¶	p-value ||
A_0001	NAD+	NAD+	C00003	HMDB00902	2961.21	3037.77	2856.92	3244.59	3464.22	3403.43	2922.31	2859.97	2790.75	2951.97	90.7797	3370.75	113.408	2857.67	65.8106	1.14186	0.0084988	**	0.968056	0.22553		0.847786	0.0052788	**
A_0002	cAMP	cAMP	C00575	HMDB00058	9.16035	12.6081	11.9372	6.09346	6.19046	6.48184	12.747	12.1839	12.0218	11.2352	1.82794	6.25525	0.202135	12.3176	0.380616	0.556754	0.040635	*	1.09634	0.4138		1.96916	0.00013674	***
A_0003	cGMP	cGMP	C00942	HMDB01314	N.D.	N.D.	N.D.	N.D.	N.D.	N.D.	N.D.	N.D.	N.D.	N.A.	N.A.	N.A.	N.A.	N.A.	N.A.	N.A.	N.A.		N.A.	N.A.		N.A.	N.A.
A_0004	NADH	NADH	C00004	HMDB01487	342.944	355.812	328.392	437.382	384.494	413.577	355.439	352.81	315.069	342.383	13.719	411.818	26.4875	341.106	22.587	1.2028	0.027417	*	0.996271	0.93814		0.828294	0.025494	*
A_0005	Xanthine	Xanthine	C00385	HMDB00292	36.7363	29.542	20.9515	18.3658	16.6899	18.4716	104.034	101.371	94.2628	29.0766	7.90266	17.8424	0.99952	99.8893	5.05123	0.613635	0.1307		3.43538	0.00050107	***	5.59841	0.00086684	***
A_0006	ADP-ribose	ADP-Rib	C00301	HMDB01178	4.8984	5.58964	4.30816	4.2553	5.48844	5.68229	3.75897	3.68354	2.77782	4.93207	0.641405	5.14201	0.774003	3.40678	0.545996	1.04257	0.73644		0.69074	0.036197	*	0.662538	0.039181	*
A_0007	Mevalonic acid	Mevalonic acid	C00418,C02104	HMDB00227	N.D.	N.D.	N.D.	N.D.	N.D.	N.D.	N.D.	N.D.	N.D.	N.A.	N.A.	N.A.	N.A.	N.A.	N.A.	N.A.	N.A.		N.A.	N.A.		N.A.	N.A.
A_0008	UDP-glucose	UDP-Glc	C00029	HMDB00286	3882.32	4081.09	3699.51	4213.65	4154.65	4196.54	2687.64	2636.74	2599.92	3887.64	190.846	4188.28	30.3551	2641.43	44.0465	1.07733	0.10871		0.679444	0.0056349	**	0.630672	3.4535e-06	***
A_0009	Uric acid	Uric acid	C00366	HMDB00289	41.8199	37.8164	38.6833	N.D.	18.9885	16.2973	10.5925	15.2113	8.08126	39.4399	2.10626	17.6429	1.90293	11.295	3.61656	0.447337	0.0029487	**	0.286386	0.00097278	***	0.640202	0.084139
A_0010	NADP+	NADP+	C00006	HMDB00217	203.741	194.031	170.046	102.261	116.93	108.718	186.12	176.423	174.971	189.273	17.3445	109.303	7.35172	179.171	6.06131	0.577489	0.0074002	**	0.946631	0.42425		1.63922	0.00027282	***
A_0011	IMP	IMP	C00130	HMDB00175	35.1742	31.3371	33.2948	10.688	33.0566	29.3564	29.218	30.4829	25.6127	33.2687	1.91869	24.367	11.99	28.4379	2.52709	0.73243	0.32659		0.854793	0.062048		1.16706	0.61892
A_0012	Sedoheptulose 7-phosphate	S7P	C05382	HMDB01068	N.D.	N.D.	N.D.	N.D.	N.D.	N.D.	N.D.	N.D.	N.D.	N.A.	N.A.	N.A.	N.A.	N.A.	N.A.	N.A.	N.A.		N.A.	N.A.		N.A.	N.A.
A_0013	Glucose 6-phosphate	G6P	C00092,C00668,C01172	HMDB01401	360.221	240.662	251.319	255.026	241.813	366.36	157.563	158.183	148.225	284.067	66.1657	287.733	68.4123	154.657	5.57901	1.0129	0.95001		0.544439	0.076168		0.537503	0.076982
A_0014	Fructose 6-phosphate	F6P	C00085,C05345	HMDB00124	159.105	88.7543	94.3762	144.896	121.321	165.136	73.1057	70.727	42.2691	114.078	39.0952	143.784	21.9286	62.0339	17.1581	1.2604	0.33079		0.543783	0.13365		0.431437	0.0081859	**
A_0015	Fructose 1-phosphate	D-F1P	C01094	HMDB01076	22.897	N.D.	N.D.	N.D.	N.D.	N.D.	N.D.	N.D.	N.D.	22.897	N.A.	N.A.	N.A.	N.A.	N.A.	<1	N.A.		<1	N.A.		N.A.	N.A.
A_0016	Galactose 1-phosphate	Gal1P	C00446	HMDB00645	83.1353	65.106	58.7789	43.3739	47.3124	42.9904	33.5566	49.2513	37.1305	69.0067	12.638	44.5589	2.3923	39.9795	8.22607	0.645718	0.073933		0.579357	0.03643	*	0.897228	0.43992
A_0017	Glucose 1-phosphate	G1P	C00103	HMDB01586	57.566	39.228	63.2726	38.8165	32.7322	40.3371	45.3631	36.8016	37.68	53.3555	12.5631	37.2953	4.02422	39.9482	4.70992	0.698995	0.14758		0.748718	0.19776		1.07113	0.50037
A_0018	Acetoacetyl CoA	AAcCoA	C00332	HMDB01484	N.D.	N.D.	N.D.	N.D.	N.D.	N.D.	N.D.	N.D.	N.D.	N.A.	N.A.	N.A.	N.A.	N.A.	N.A.	N.A.	N.A.		N.A.	N.A.		N.A.	N.A.
A_0019	Acetyl CoA	AcCoA	C00024	HMDB01206	3.52315	3.5583	9.09553	15.6919	8.23652	19.4288	16.8072	11.5641	11.2624	5.39233	3.20712	14.4524	5.69817	13.2112	3.11786	2.68018	0.091732		2.45	0.038907	*	0.914118	0.76178
A_0020	Folic acid	Folic acid	C00504	HMDB00121	1.81122	1.75765	1.82321	2.50395	2.34926	N.D.	2.18059	2.23649	1.98497	1.79736	0.0349086	2.42661	0.109382	2.13402	0.132067	1.35009	0.062436		1.1873	0.040121	*	0.879424	0.085121
A_0021	Ribose 5-phosphate	R5P	C00117	HMDB01548	68.2878	61.9718	55.5751	71.0496	74.2889	73.7171	34.393	38.3484	25.3782	61.9449	6.35638	73.0185	1.72895	32.7065	6.64757	1.17877	0.085514		0.527994	0.0053379	**	0.447921	0.0061316	**
A_0022	CoA	CoA	C00010	HMDB01423	113.93	114.421	98.8227	98.7761	27.554	96.3356	113.734	118.08	106.944	109.058	8.86722	74.2219	40.434	112.919	5.61251	0.680574	0.27187		1.03541	0.56448		1.52137	0.23772
A_0023	Ribose 1-phosphate	R1P	C00620	HMDB01489	29.2818	22.5879	24.6354	29.375	37.573	44.804	40.9913	31.2375	44.7497	25.5017	3.42999	37.2507	7.71955	38.9928	6.97426	1.46071	0.10257		1.52903	0.059532		1.04677	0.78634
A_0024	Ribulose 5-phosphate	Ru5P	C00199,C01101	HMDB00618	41.0954	40.4372	43.0477	47.8852	46.8107	50.1925	18.8916	21.9803	16.2343	41.5268	1.35767	48.2961	1.72793	19.0354	2.87569	1.16301	0.0069201	**	0.458388	0.0014971	**	0.394139	0.00038308	***
A_0025	Xylulose 5-phosphate	X5P	C00231,C03291	HMDB00868	21.4063	45.7721	N.D.	N.D.	16.0592	N.D.	N.D.	N.D.	N.D.	33.5892	17.2292	16.0592	N.A.	N.A.	N.A.	0.478107	N.A.		<1	N.A.		<1	N.A.
A_0026	Erythrose 4-phosphate	E4P	C00279	HMDB01321	N.D.	N.D.	N.D.	N.D.	N.D.	N.D.	N.D.	N.D.	N.D.	N.A.	N.A.	N.A.	N.A.	N.A.	N.A.	N.A.	N.A.		N.A.	N.A.		N.A.	N.A.
A_0027	HMG CoA	HMG-CoA	C00356	HMDB01375	6.99281	9.40844	9.42405	8.86232	11.3372	11.0864	13.3129	12.4591	12.0765	8.60843	1.39919	10.4286	1.36225	12.6162	0.633004	1.21144	0.18178		1.46556	0.023686	*	1.20976	0.091191
A_0028	Glyceraldehyde 3-phosphate	Glyceraldehyde 3-phosphate	C00118,C00661	HMDB01112	429.769	517.834	574.063	644.644	548.899	614.118	457.129	407.39	407.651	507.222	72.73	602.554	48.9088	424.056	28.6417	1.18795	0.14277		0.836037	0.17633		0.703765	0.0099792	**
A_0029	NADPH	NADPH	C00005	HMDB00221	125.341	144.881	155.353	223.653	180.759	177.856	174.029	169.012	173.515	141.858	15.2327	194.089	25.6443	172.185	2.75993	1.36819	0.050544		1.21378	0.070409		0.887144	0.27645
A_0030	Malonyl CoA	Malonyl-CoA	C00083	HMDB01175	11.2726	10.4714	12.3725	12.3435	10.4434	12.6785	15.0572	14.6459	11.3256	11.3721	0.954447	11.8218	1.20545	13.6762	2.04609	1.03954	0.64044		1.20261	0.18074		1.15687	0.26288
A_0031	Phosphocreatine	Phosphocreatine	C02305	HMDB01511	5896.79	5984.34	6125.8	5638.86	5741.69	5632.9	6312.69	6295.57	6115.78	6002.31	115.558	5671.15	61.164	6241.34	109.08	0.944828	0.021355	*	1.03982	0.059908		1.10054	0.0035664	**
A_0032	XMP	XMP	C00655	HMDB01554	2.94892	2.99664	1.85902	2.4097	3.09588	2.50629	5.99926	5.22926	6.28822	2.60153	0.643471	2.67063	0.371437	5.83891	0.547386	1.02656	0.88167		2.24442	0.0029238	**	2.18635	0.0019711	**
A_0033	Dihydroxyacetone phosphate	DHAP	C00111	HMDB01473	1429.8	1662.94	1494.22	1598.76	1596.17	1560.79	1209.83	1058.19	950.346	1528.99	120.398	1585.24	21.2115	1072.79	130.359	1.03679	0.5048		0.701635	0.011383	*	0.676738	0.018735	*
A_0034	Adenylosuccinic acid	Succinyl AMP	C03794	HMDB00536	3.66316	3.58421	3.72913	5.80711	5.58017	5.93957	4.68439	4.47503	4.44697	3.65883	0.0725546	5.77561	0.181756	4.53546	0.129738	1.57854	0.00072625	***	1.23959	0.0016393	**	0.785278	0.0010509	**
A_0035	Fructose 1,6-diphosphate	F1,6P	C00354	HMDB01058	4341.58	4098.63	3844.52	6326.76	6517.62	6730.09	2068.51	2029.86	1452.93	4094.91	248.551	6524.82	201.763	1850.43	344.788	1.5934	0.00024759	***	0.451886	0.0012252	**	0.283599	0.00016399	***
A_0036	6-Phosphogluconic acid	6-PG	C00345	HMDB01316	105.246	82.6759	71.8327	75.6466	74.3021	82.8293	45.9626	45.025	39.9649	86.5849	17.0464	77.5927	4.58457	43.6508	3.22634	0.896145	0.4604		0.504139	0.044489	*	0.562564	0.00080491	***
A_0037	N-Carbamoylaspartic acid	Carbamoyl-Asp	C00438	HMDB00828	35.156	37.6345	32.2931	23.913	25.7311	23.4079	14.2445	16.0265	13.3623	35.0279	2.673	24.3507	1.2219	14.5444	1.3572	0.695179	0.0099152	**	0.415223	0.0013667	**	0.59729	0.00078293	***
A_0038	PRPP	PRPP	C00119	HMDB00280	66.1639	69.2777	57.0176	42.6911	39.8383	44.7704	11.2215	10.4916	10.2725	64.1531	6.37265	42.4333	2.4761	10.6619	0.496908	0.661438	0.017181	*	0.166194	0.004499	**	0.251262	0.0014257	**
A_0039	2-Phosphoglyceric acid	2-PG	C00631	HMDB03391	15.1173	19.1449	22.0046	27.6077	32.1403	25.4813	19.9401	16.8099	17.751	18.7556	3.4601	28.4097	3.40115	18.167	1.60599	1.51473	0.026152	*	0.968619	0.8076		0.639464	0.020234	*
A_0040	2,3-Diphosphoglyceric acid	Diphosphoglycerate	C01159	HMDB01294	19.9352	33.8902	28.4467	102.649	95.0866	92.4494	40.1115	36.5837	41.0123	27.4241	7.03347	96.7283	5.29421	39.2358	2.34058	3.52713	0.00026173	***	1.43071	0.088497		0.405629	0.00069619	***
A_0041	3-Phosphoglyceric acid	3-PG	C00197	HMDB00807	133.644	179.386	179.918	267.379	260.24	254.174	182.251	155.827	172.858	164.316	26.5645	260.598	6.60978	170.312	13.3949	1.58595	0.019454	*	1.03649	0.75043		0.653543	0.0020944	**
A_0042	Phosphoenolpyruvic acid	PEP	C00074	HMDB00263	25.7777	48.4302	56.4945	70.0952	63.142	58.2601	41.0415	32.3881	42.441	43.5674	15.9253	63.8324	5.94768	38.6235	5.44521	1.46514	0.14691		0.886523	0.65292		0.605077	0.0057629	**
A_0043	GMP	GMP	C00144	HMDB01397	27.4874	24.0332	27.7533	56.3305	59.1334	54.15	21.4347	26.5826	N.D.	26.4246	2.0753	56.538	2.49813	24.0086	3.64008	2.13959	0.0001099	***	0.90857	0.51234		0.424646	0.015493	*
A_0044	AMP	AMP	C00020	HMDB00045	157.964	172.955	159.769	207.797	191.17	195.859	200.437	191.996	181.171	163.562	8.18392	198.275	8.57261	191.201	9.65785	1.21223	0.0071563	**	1.16898	0.020369	*	0.964323	0.39716
A_0045	2-Oxoisovaleric acid	2-KIV	C00141	HMDB00019	104.932	99.2755	95.0209	194.779	181.586	185.684	138.242	134.758	115.737	99.7429	4.97232	187.35	6.7523	129.579	12.1135	1.87833	9.9748e-05	***	1.29913	0.036152	*	0.691641	0.0047381	**
A_0046	GDP	GDP	C00035	HMDB01201	116.14	133.108	139.687	187.276	185.287	171.272	123.701	123.682	119.177	129.645	12.1491	181.278	8.72283	122.187	2.60621	1.39827	0.0053317	**	0.942474	0.39976		0.674029	0.0042416	**
A_0047	Lactic acid	Lactic acid	C00186,C00256,C01432	HMDB00190,HMDB01311	55576.9	51328.6	41023.8	45727.8	47413.8	47352.8	62882.1	71955.1	54225.8	49309.7	7483.63	46831.5	956.327	63021	8865.47	0.949741	0.62516		1.27806	0.11204		1.3457	0.085432
A_0048	ADP	ADP	C00008	HMDB01341	501.916	642.408	666.636	1116.58	1207.56	1098.99	950.284	874.812	973.828	603.653	88.9357	1141.04	58.2694	932.975	51.7278	1.89023	0.0017871	**	1.54555	0.0096153	**	0.817651	0.010174	*
A_0049	GTP	GTP	C00044	HMDB01273	6243.64	6526.71	5926.48	5384.12	5503.14	5267.11	5288.81	5443.11	4875.53	6232.28	300.275	5384.79	118.014	5202.48	293.473	0.864016	0.02683	*	0.834764	0.013193	*	0.966144	0.40093
A_0050	Glyoxylate	Glyoxylate	C00048	HMDB00119	N.D.	N.D.	N.D.	N.D.	N.D.	N.D.	N.D.	N.D.	N.D.	N.A.	N.A.	N.A.	N.A.	N.A.	N.A.	N.A.	N.A.		N.A.	N.A.		N.A.	N.A.
A_0051	ATP	ATP	C00002	HMDB00538	27788.3	28847.3	26855.2	30062.9	31004.2	30378.1	43460.3	42918.4	38852.2	27830.3	996.711	30481.7	479.106	41743.7	2518.71	1.09527	0.027513	*	1.49994	0.005057	**	1.36946	0.013792	*
A_0052	Glycerol 3-phosphate	Glycerol 3-phosphate	C00093	HMDB00126	554.131	507.379	523.219	575.063	549.286	586.431	554.173	587.447	495.153	528.243	23.7774	570.26	19.0327	545.591	46.7416	1.07954	0.078301		1.03284	0.60716		0.956741	0.46688
A_0053	Glycolic acid	Glycolic acid	C00160	HMDB00115	N.D.	N.D.	N.D.	N.D.	N.D.	N.D.	N.D.	N.D.	N.D.	N.A.	N.A.	N.A.	N.A.	N.A.	N.A.	N.A.	N.A.		N.A.	N.A.		N.A.	N.A.
A_0054	Pyruvic acid	Pyruvic acid	C00022	HMDB00243	2109.35	1850.81	1673.85	1881.12	1519.33	1977.01	2770.01	2888.7	2362.31	1878	219.02	1792.49	241.369	2673.67	276.103	0.954464	0.67328		1.42368	0.019139	*	1.4916	0.014653	*
A_0055	N-Acetylglutamic acid	N-AcGlu	C00624	HMDB01138	36.5268	35.1361	28.3223	N.D.	24.1734	24.7154	30.7691	33.4677	28.0702	33.3284	4.39084	24.4444	0.383201	30.769	2.69878	0.733441	0.071074		0.923207	0.44733		1.25873	0.051958
A_0056	2-Hydroxyglutaric acid	2-Hydroxyglutaric acid	C01087,C02630,C03196	HMDB00606,HMDB00694	249.962	252.915	237.574	183.486	204.436	175.893	229.18	205.722	197.884	246.817	8.13994	187.939	14.7833	210.928	16.2849	0.761449	0.008185	**	0.854595	0.043313	*	1.12233	0.14514
A_0057	Carbamoylphosphate	Carbamoyl-P	C00169	HMDB01096	N.D.	N.D.	N.D.	N.D.	N.D.	N.D.	N.D.	N.D.	N.D.	N.A.	N.A.	N.A.	N.A.	N.A.	N.A.	N.A.	N.A.		N.A.	N.A.		N.A.	N.A.
A_0058	Succinic acid	Succinic acid	C00042	HMDB00254	522.862	437.081	406.204	513.442	598.061	515.71	428.087	467.941	391.365	455.382	60.4443	542.404	48.2133	429.131	38.299	1.1911	0.12654		0.942354	0.56556		0.791165	0.035757	*
A_0059	Malic acid	Malic acid	C00149,C00497,C00711	HMDB00156,HMDB00744	3396.64	3274.75	2824.64	4209.25	4310.48	4114.17	4615.93	4505.73	3944.55	3165.35	301.287	4211.3	98.1713	4355.4	360.053	1.33044	0.018587	*	1.37596	0.012607	*	1.03422	0.5646
A_0060	2-Oxoglutaric acid	2-OG	C00026	HMDB00208	2890.9	2717.28	2146.09	2100.33	1894.41	2162.16	1495.19	1790.95	1429.85	2584.76	389.687	2052.3	140.191	1572	192.415	0.794002	0.12962		0.608179	0.028766	*	0.765967	0.028931	*
A_0061	Fumaric acid	Fumaric acid	C00122	HMDB00134	454.61	458.85	424.002	712.881	791.947	678.047	636.535	693.409	646.637	445.82	19.0142	727.625	58.3634	658.86	30.3433	1.6321	0.008637	**	1.47786	0.0011704	**	0.905494	0.16765
A_0062	Citric acid	Citric acid	C00158	HMDB00094	7800.82	8025.84	7243.29	8375.29	8482.23	8290.86	8522.2	8805.76	8097.39	7689.99	402.874	8382.79	95.9046	8475.12	356.525	1.09009	0.089442		1.1021	0.065727		1.01101	0.70238
A_0063	cis-Aconitic acid	cis-Aconitic acid	C00417	HMDB00072	174.739	182.26	175.769	190.264	185.693	183.463	186.822	194.647	190.331	177.589	4.07758	186.473	3.4671	190.6	3.91919	1.05003	0.046631	*	1.07326	0.016388	*	1.02213	0.24472
A_0064	Isocitric acid	Isocitric acid	C00311	HMDB00193	440.146	435.347	407.31	501.517	486.361	519.994	484.497	433.524	482.46	427.601	17.7358	502.624	16.8438	466.827	28.8591	1.17545	0.0060808	**	1.09174	0.12963		0.92878	0.1542
C_0001	Urea	Urea	C00086	HMDB00294	3899.07	3650.35	3808.28	3504.11	4612.36	4367.28	3011.72	3563.63	2942.2	3785.9	125.865	4161.25	582.144	3172.52	340.49	1.09914	0.3806		0.837982	0.075045		0.762396	0.078912
C_0002	Gly	Gly	C00037	HMDB00123	123314	131412	118873	158766	153809	153559	102572	113531	102685	124533	6357.91	155378	2936.64	106263	6294.5	1.24769	0.0058125	**	0.853289	0.02408	*	0.683896	0.0015433	**
C_0003	Putrescine	Putrescine	C00134	HMDB01414	46.5811	42.3011	41.9048	646.795	681.606	674.613	195.757	233.997	197.318	43.5957	2.59303	667.672	18.4143	209.024	21.6409	15.3151	0.00022598	***	4.7946	0.0051369	**	0.313064	1.2205e-05	***
C_0004	β-Ala	b-Ala	C00099	HMDB00056	8099.24	8908.83	8133.15	842.221	871.756	886.238	7351.37	7874.64	7471.61	8380.41	457.938	866.738	22.4331	7565.87	274.074	0.103424	0.0012072	**	0.902805	0.070734		8.72913	0.00051666	***
C_0005	Sarcosine	Sarcosine	C00213	HMDB00271	N.D.	N.D.	N.D.	N.D.	N.D.	N.D.	N.D.	N.D.	N.D.	N.A.	N.A.	N.A.	N.A.	N.A.	N.A.	N.A.	N.A.		N.A.	N.A.		N.A.	N.A.
C_0006	Ala	Ala	C00041,C00133,C01401	HMDB00161,HMDB01310	55956.2	58576	54354.7	85816	90235.1	90560.8	75044.1	80288.7	74274.8	56295.6	2131	88870.7	2650.41	76535.9	3272.78	1.57864	0.00010529	***	1.35953	0.0016693	**	0.861205	0.0079573	**
C_0007	γ-Aminobutyric acid	g-Aminobutyric acid	C00334	HMDB00112	672.803	784.765	777.634	417.18	395.225	418.784	199.984	222.791	222.048	745.068	62.6843	410.396	13.1633	214.941	12.9584	0.550817	0.0091393	**	0.288486	0.0034347	**	0.523741	5.2232e-05	***
C_0008	N,N-Dimethylglycine	DMG	C01026	HMDB00092	N.D.	N.D.	N.D.	N.D.	N.D.	N.D.	N.D.	N.D.	N.D.	N.A.	N.A.	N.A.	N.A.	N.A.	N.A.	N.A.	N.A.		N.A.	N.A.		N.A.	N.A.
C_0009	Choline	Choline	C00114	HMDB00097	N.D.	N.D.	N.D.	N.D.	N.D.	N.D.	N.D.	N.D.	N.D.	N.A.	N.A.	N.A.	N.A.	N.A.	N.A.	N.A.	N.A.		N.A.	N.A.		N.A.	N.A.
C_0010	Ser	Ser	C00065,C00716,C00740	HMDB00187,HMDB03406	7430.62	7515.88	8026.01	15279.9	14318.4	14471	11056.2	10688.8	10961.5	7657.5	321.969	14689.8	516.742	10902.1	190.746	1.91835	0.0001329	***	1.42372	0.00041004	***	0.742158	0.0027227	**
C_0011	Carnosine	Carnosine	C00386	HMDB00033	111.812	130.879	114.43	90.5996	86.6623	85.0713	133.765	150.947	161.251	119.04	10.3359	87.4444	2.84591	148.655	13.8858	0.734579	0.026892	*	1.24878	0.045738	*	1.69999	0.013853	*
C_0012	Creatinine	Creatinine	C00791	HMDB00562	175.171	203.387	150.642	196.101	191.332	173.644	179.944	208.31	175.817	176.4	26.3943	187.026	11.8316	188.023	17.6891	1.06024	0.57321		1.06589	0.5654		1.00533	0.93972
C_0013	Pro	Pro	C00148,C00763,C16435	HMDB00162,HMDB03411	13392.2	14353.2	11894.4	31027.9	31591.9	32542	18644.8	22562.7	18704.6	13213.3	1239.11	31720.6	765.215	19970.7	2244.95	2.40067	0.00010041	***	1.51141	0.018168	*	0.629582	0.0068393	**
C_0014	Betaine	Betaine	C00719	HMDB00043	N.D.	N.D.	N.D.	N.D.	N.D.	N.D.	N.D.	N.D.	N.D.	N.A.	N.A.	N.A.	N.A.	N.A.	N.A.	N.A.	N.A.		N.A.	N.A.		N.A.	N.A.
C_0015	Val	Val	C00183,C06417,C16436	HMDB00883	1212.05	1180.37	1204.26	4539.63	4230.29	4153.87	2190.99	2068.75	1978.73	1198.89	16.5076	4307.93	204.261	2079.49	106.536	3.59326	0.0013497	**	1.73451	0.0040969	**	0.482712	0.00045143	***
C_0016	Homoserine	Homoserine	C00263	HMDB00719	29.3074	33.2581	28.8707	N.D.	N.D.	N.D.	29984.6	31994.3	29332.2	30.4787	2.41688	N.A.	N.A.	30437	1387.53	<1	N.A.		998.632	0.00069337	***	1<	N.A.
C_0017	Thr	Thr	C00188,C00820	HMDB00167	4937.07	4955.52	4842.45	12876.2	12216.5	12593	5149.88	5215.69	4908.88	4911.68	60.6605	12561.9	330.948	5091.48	161.525	2.55756	0.00043062	***	1.03661	0.18469		0.40531	6.5863e-05	***
C_0018	Betaine aldehyde	BTL	C00576	HMDB01252	N.D.	N.D.	N.D.	N.D.	N.D.	N.D.	N.D.	N.D.	N.D.	N.A.	N.A.	N.A.	N.A.	N.A.	N.A.	N.A.	N.A.		N.A.	N.A.		N.A.	N.A.
C_0019	Cys	Cys	C00097,C00736,C00793	HMDB00574,HMDB03417	112.828	127.701	320.809	408.153	N.D.	363.956	92.457	55.9829	66.5011	187.113	116.023	386.054	31.252	71.647	18.7736	2.06322	0.086219		0.382908	0.22471		0.185588	0.016585	*
C_0020	Hydroxyproline	Hydroxyproline	C01015,C01157	HMDB06055,HMDB00725	10602.1	11068.9	10084.8	13087	12819.1	12460.7	10316.9	10799.8	10028	10585.3	492.292	12788.9	314.239	10381.6	389.952	1.20818	0.0049096	**	0.980756	0.60573		0.81176	0.0013746	**
C_0021	Creatine	Creatine	C00300	HMDB00064	11058.4	10856.3	9994.96	7611.58	7154.95	7229.08	9895.95	10719.2	9552.41	10636.6	564.774	7331.87	245.057	10055.9	599.605	0.689307	0.0038344	**	0.945403	0.28932		1.37153	0.0080112	**
C_0022	Leu	Leu	C00123,C01570,C16439	HMDB00687	2129.34	1983.82	1918.18	5051.22	4754.19	4483.81	3450.5	3237.76	2944.61	2010.45	108.069	4763.07	283.81	3210.96	254.008	2.36916	0.0012769	**	1.59714	0.0069081	**	0.674137	0.0022238	**
C_0023	Ile	Ile	C00407,C06418,C16434	HMDB00172	2049.63	1915.53	1863.9	4250.82	3814.17	3599.73	3165.93	3033.41	2698.14	1943.02	95.8676	3888.24	331.806	2965.83	241.103	2.00114	0.0061014	**	1.5264	0.0098054	**	0.762768	0.020914	*
C_0024	Asn	Asn	C00152,C01905,C16438	HMDB00168	17405.6	17991.1	16777.4	28748.3	28750.5	28150	18564.2	18985.5	17964.7	17391.4	607.004	28549.6	346.036	18504.8	513.008	1.6416	6.8064e-05	***	1.06402	0.074016		0.648164	2.9472e-05	***
C_0025	Ornithine	Ornithine	C00077,C00515,C01602	HMDB00214,HMDB03374	324.186	319.499	315.104	683.843	631.512	623.484	281.011	264.948	226.988	319.596	4.54161	646.28	32.7774	257.649	27.7414	2.02218	0.0028785	**	0.806171	0.057338		0.398665	0.00011579	***
C_0026	Asp	Asp	C00049,C00402,C16433	HMDB00191,HMDB06483	8061.31	8119.87	7737.76	7919.79	7601.85	7295.45	11395.4	10822.6	10943.5	7972.98	205.801	7605.7	312.191	11053.8	301.931	0.953934	0.17511		1.38641	0.00027844	***	1.45336	0.00016317	***
C_0027	Homocysteine	Homocysteine	C00155,C05330	HMDB00742	N.D.	N.D.	N.D.	N.D.	N.D.	N.D.	N.D.	N.D.	N.D.	N.A.	N.A.	N.A.	N.A.	N.A.	N.A.	N.A.	N.A.		N.A.	N.A.		N.A.	N.A.
C_0028	Adenine	Adenine	C00147	HMDB00034	N.D.	8.9703	N.D.	N.D.	N.D.	N.D.	2471.69	3074.83	2303.58	8.9703	N.A.	N.A.	N.A.	2616.7	405.562	<1	N.A.		291.707	N.A.		1<	N.A.
C_0029	Hypoxanthine	Hypoxanthine	C00262	HMDB00157	N.D.	N.D.	N.D.	N.D.	N.D.	N.D.	414.28	476.805	415.119	N.A.	N.A.	N.A.	N.A.	435.402	35.8591	N.A.	N.A.		1<	N.A.		1<	N.A.
C_0030	Spermidine	Spermidine	C00315	HMDB01257	226.355	229.678	206.297	227.361	199.669	179.003	255.197	287.33	241.589	220.777	12.6493	202.011	24.2638	261.372	23.4873	0.915	0.32004		1.18387	0.076081		1.29385	0.038281	*
C_0031	Gln	Gln	C00064,C00303,C00819	HMDB00641,HMDB03423	3672.17	3217.63	3465.05	3187.65	2816.63	3026.3	2939.87	2788.73	2624.02	3451.62	227.566	3010.19	186.032	2784.21	157.969	0.872111	0.062348		0.806638	0.017757	*	0.924926	0.18587
C_0032	Lys	Lys	C00047,C00739,C16440	HMDB00182,HMDB03405	1369.3	1346.54	1378.15	2345.21	2323.89	2233.3	2020.7	1929.96	1827.78	1364.66	16.3092	2300.8	59.4225	1926.15	96.5131	1.68598	0.00066658	***	1.41145	0.0082738	**	0.837165	0.0079344	**
C_0033	Glu	Glu	C00025,C00217,C00302	HMDB00148,HMDB03339	68368.7	73958.6	68695.8	83884.8	81294	86085	62405.1	62125.7	60179.6	70341	3137.15	83754.6	2398.13	61570.1	1212.28	1.19069	0.0051259	**	0.875309	0.027709	*	0.735125	0.00079615	***
C_0034	Met	Met	C00073,C00855,C01733	HMDB00696	3436.64	3520.28	3217.02	N.D.	N.D.	N.D.	534.718	481.901	486.754	3391.31	156.633	N.A.	N.A.	501.124	29.1945	<1	N.A.		0.147767	0.00068827	***	1<	N.A.
C_0035	Guanine	Guanine	C00242	HMDB00132	N.D.	N.D.	N.D.	N.D.	N.D.	N.D.	N.D.	N.D.	N.D.	N.A.	N.A.	N.A.	N.A.	N.A.	N.A.	N.A.	N.A.		N.A.	N.A.		N.A.	N.A.
C_0036	His	His	C00135,C00768,C06419	HMDB00177	2216.52	2264.98	2047.79	4579.17	4525.88	4392.4	2471.36	2625.3	2176.68	2176.43	114.005	4499.15	96.2087	2424.45	227.963	2.06722	1.4353e-05	***	1.11396	0.19231		0.538867	0.0012397	**
C_0037	Carnitine	Carnitine	C00318,C00487,C15025	HMDB00062	N.D.	N.D.	N.D.	N.D.	N.D.	N.D.	N.D.	N.D.	N.D.	N.A.	N.A.	N.A.	N.A.	N.A.	N.A.	N.A.	N.A.		N.A.	N.A.		N.A.	N.A.
C_0038	Phe	Phe	C00079,C02057,C02265	HMDB00159	1493.62	1544	1437.28	4502.98	4412.92	4160.01	1848.98	1957.39	1765.64	1491.63	53.391	4358.63	177.815	1857.34	96.1508	2.92206	0.00055401	***	1.24517	0.0092798	**	0.426128	0.00018812	***
C_0039	Arg	Arg	C00062,C00792	HMDB00517,HMDB03416	7406.56	8459.28	6634.39	10207.7	10219.8	10690.4	8562.65	10382.2	9389.51	7500.08	916.034	10372.7	275.251	9444.78	911.016	1.38301	0.024444	*	1.25929	0.059596		0.910545	0.21386
C_0040	Citrulline	Citrulline	C00327	HMDB00904	87.032	103.592	94.9139	175	144.14	137.268	116.608	129.584	106.248	95.1794	8.28342	152.136	20.0968	117.48	11.6926	1.59841	0.025809	*	1.2343	0.060762		0.772207	0.076153
C_0041	Tyr	Tyr	C00082,C01536,C06420	HMDB00158	2061.04	2065.9	1930.48	4746.93	4729.37	4695.14	2477.52	2575.44	2346.59	2019.14	76.8213	4723.81	26.3416	2466.51	114.818	2.33952	6.4003e-05	***	1.22157	0.0073698	**	0.522145	0.00050174	***
C_0042	S-Adenosylhomocysteine	SAH	C00021	HMDB00939	11.084	10.1694	10.0863	N.D.	13.8131	N.D.	61.7981	71.8647	64.6542	10.4466	0.553621	13.8131	N.A.	66.1056	5.18788	1.32227	N.A.		6.32798	0.0026308	**	4.78571	N.A.
C_0043	Spermine	Spermine	C00750	HMDB01256	157.651	149.662	157.555	141.715	128.044	143.07	133.887	127.747	109.573	154.956	4.585	137.61	8.31203	123.736	12.6436	0.888055	0.048142	*	0.798522	0.0381	*	0.899181	0.19844
C_0044	Trp	Trp	C00078,C00525,C00806	HMDB00929	206.741	211.776	199.842	930.958	924.056	904.929	363.966	343.191	320.768	206.119	5.99139	919.981	13.4843	342.642	21.6043	4.46334	8.7695e-06	***	1.66235	0.0053202	**	0.372444	1.3875e-05	***
C_0045	Cystathionine	Cystathionine	C00542,C02291	HMDB00099	14.8268	22.5718	16.8279	N.D.	7.8419	N.D.	183.319	210.243	162.942	18.0755	4.02037	7.8419	N.A.	185.501	23.7261	0.433841	N.A.		10.2626	0.0055255	**	23.6552	N.A.
C_0046	Adenosine	Adenosine	C00212	HMDB00050	N.D.	N.D.	N.D.	N.D.	N.D.	N.D.	N.D.	N.D.	N.D.	N.A.	N.A.	N.A.	N.A.	N.A.	N.A.	N.A.	N.A.		N.A.	N.A.		N.A.	N.A.
C_0047	Inosine	Inosine	C00294	HMDB00195	N.D.	N.D.	N.D.	N.D.	N.D.	N.D.	13.9464	N.D.	20.4725	N.A.	N.A.	N.A.	N.A.	17.2094	4.61465	N.A.	N.A.		1<	N.A.		1<	N.A.
C_0048	Guanosine	Guanosine	C00387	HMDB00133	19.0262	19.5528	N.D.	N.D.	N.D.	N.D.	23.8229	23.2913	22.6191	19.2895	0.37235	N.A.	N.A.	23.2444	0.603298	<1	N.A.		1.20503	0.0028892	**	1<	N.A.
C_0049	Argininosuccinic acid	ArgSuccinate	C03406	HMDB00052	250.428	254.839	193.703	375.371	443.71	374.496	452.186	493.87	393.646	232.99	34.0951	397.859	39.7104	446.567	50.3475	1.70762	0.005854	**	1.91668	0.0055529	**	1.12243	0.26215
C_0050	Glutathione (GSSG)	GSSG	C00127	HMDB03337	1988.95	2157.62	1538.84	1506.8	9392.39	1670.61	2213.95	2685.77	2282.65	1895.14	319.884	4189.94	4506.2	2394.12	254.897	2.21089	0.47095		1.2633	0.10559		0.571399	0.56154
C_0051	Glutathione (GSH)	GSH	C00051	HMDB00125	29237	30658.8	28762	20464	3840.67	19675.6	31319.9	29076.1	28280.8	29552.6	986.979	14660.1	9378.2	29558.9	1576.02	0.496068	0.10909		1.00021	0.99564		2.01628	0.10676
C_0052	S-Adenosylmethionine	SAM	C00019	HMDB01185	352.254	360.32	349.624	N.D.	N.D.	N.D.	1038.83	1079.67	946.474	354.066	5.57344	N.A.	N.A.	1021.66	68.2372	<1	N.A.		2.8855	0.0032909	**	1<	N.A.
-	SAM/SAH	No Label	No ID	No ID	31.7803	35.4318	34.6634	N.A.	N.A.	N.A.	16.8101	15.0236	14.639	33.9585	1.9251	N.A.	N.A.	15.4909	1.1585	<1	N.A.		0.456171	0.00046184	***	1<	N.A.
ID consists of analysis mode and number. 'C' and 'A' showed cation and anion modes, respectively.
N.D. (Not Detected): The target peak or metabolite was below detection limits.
N.A. (Not Available): The calculation was impossible because of insufficience of the data.
¶ The ratio is of computed by using averaged detection values. The latter was used as denominator.
|| The p-value is computed by Welch's t-test. (*<0.05, **<0.01, ***<0.001)
The data are sorted by ID in ascending order.

## Sheet: Metaboanalyst
	f.value	p.value	-LOG10(p)	FDR	Fisher's LSD
L-Tryptophan	1900.7	3.9136e-09	8.4074	4.0301e-07	nomet - CTL; SAM - CTL; nomet - SAM
L-Homoserine	1442.2	8.945e-09	8.0484	4.0301e-07	SAM - CTL; SAM - nomet
L-Threonine	1233	1.43e-08	7.8447	4.0301e-07	nomet - CTL; nomet - SAM
Putrescine	1148	1.7708e-08	7.7518	4.0301e-07	nomet - CTL; SAM - CTL; nomet - SAM
L-Methionine	1145.3	1.7833e-08	7.7488	4.0301e-07	CTL - nomet; CTL - SAM; SAM - nomet
L-Tyrosine	958.34	3.039e-08	7.5173	5.7234e-07	nomet - CTL; SAM - CTL; nomet - SAM
Beta-Alanine	535.56	1.7285e-07	6.7623	2.6339e-06	CTL - nomet; CTL - SAM; SAM - nomet
SAM/SAH	504.54	2.0652e-07	6.685	2.6339e-06	CTL - nomet; CTL - SAM; SAM - nomet
L-Phenylalanine	501.89	2.0978e-07	6.6782	2.6339e-06	nomet - CTL; SAM - CTL; nomet - SAM
S-Adenosylmethionine	452.97	2.848e-07	6.5455	2.9369e-06	CTL - nomet; SAM - CTL; SAM - nomet
L-Asparagine	452.4	2.8589e-07	6.5438	2.9369e-06	nomet - CTL; SAM - CTL; nomet - SAM
L-Valine	432.77	3.2629e-07	6.4864	3.0725e-06	nomet - CTL; SAM - CTL; nomet - SAM
Hypoxanthine	286.29	1.1153e-06	5.9526	9.5837e-06	SAM - CTL; SAM - nomet
D-Serine	273.87	1.2722e-06	5.8955	9.5837e-06	nomet - CTL; SAM - CTL; nomet - SAM
L-Serine	273.87	1.2722e-06	5.8955	9.5837e-06	nomet - CTL; SAM - CTL; nomet - SAM
Fructose 1,6-bisphosphate	222.18	2.3648e-06	5.6262	1.6701e-05	nomet - CTL; CTL - SAM; nomet - SAM
D-Ornithine	209.55	2.8119e-06	5.551	1.7653e-05	nomet - CTL; CTL - SAM; nomet - SAM
Ornithine	209.55	2.8119e-06	5.551	1.7653e-05	nomet - CTL; CTL - SAM; nomet - SAM
Adenylsuccinic acid	200.47	3.2054e-06	5.4941	1.8825e-05	nomet - CTL; SAM - CTL; nomet - SAM
L-Histidine	197.57	3.3462e-06	5.4754	1.8825e-05	nomet - CTL; nomet - SAM
Xanthine	194.62	3.4985e-06	5.4561	1.8825e-05	CTL - nomet; SAM - CTL; SAM - nomet
L-Cystathionine	156.27	6.6827e-06	5.1751	3.0832e-05	SAM - CTL; SAM - nomet
D-Ribulose 5-phosphate	154.56	6.9027e-06	5.161	3.0832e-05	nomet - CTL; CTL - SAM; nomet - SAM
Uridine diphosphate glucose	154.49	6.9114e-06	5.1604	3.0832e-05	nomet - CTL; CTL - SAM; nomet - SAM
D-Lysine	152.24	7.217e-06	5.1416	3.0832e-05	nomet - CTL; SAM - CTL; nomet - SAM
L-Lysine	152.24	7.217e-06	5.1416	3.0832e-05	nomet - CTL; SAM - CTL; nomet - SAM
Gamma-Aminobutyric acid	151.18	7.3669e-06	5.1327	3.0832e-05	CTL - nomet; CTL - SAM; nomet - SAM
Phosphoribosyl pyrophosphate	143.89	8.5189e-06	5.0696	3.3331e-05	CTL - nomet; CTL - SAM; nomet - SAM
2,3-Diphosphoglyceric acid	143.69	8.5539e-06	5.0678	3.3331e-05	nomet - CTL; SAM - CTL; nomet - SAM
D-Aspartic acid	139.74	9.2837e-06	5.0323	3.3841e-05	SAM - CTL; SAM - nomet
L-Aspartic acid	139.74	9.2837e-06	5.0323	3.3841e-05	SAM - CTL; SAM - nomet
S-Adenosylhomocysteine	136.5	9.9449e-06	5.0024	3.5118e-05	SAM - CTL; SAM - nomet
Adenine	124.69	1.2968e-05	4.8871	4.4405e-05	SAM - CTL; SAM - nomet
L-Proline	110.24	1.8596e-05	4.7306	5.6724e-05	nomet - CTL; SAM - CTL; nomet - SAM
D-Proline	110.24	1.8596e-05	4.7306	5.6724e-05	nomet - CTL; SAM - CTL; nomet - SAM
L-Leucine	109.44	1.8994e-05	4.7214	5.6724e-05	nomet - CTL; SAM - CTL; nomet - SAM
D-Alanine	109.28	1.9075e-05	4.7195	5.6724e-05	nomet - CTL; SAM - CTL; nomet - SAM
L-Alanine	109.28	1.9075e-05	4.7195	5.6724e-05	nomet - CTL; SAM - CTL; nomet - SAM
Alpha-ketoisovaleric acid	84.962	3.9671e-05	4.4015	0.00011494	nomet - CTL; SAM - CTL; nomet - SAM
Ureidosuccinic acid	70.341	6.8441e-05	4.1647	0.00019335	CTL - nomet; CTL - SAM; nomet - SAM
D-Glutamic acid	65.845	8.2748e-05	4.0822	0.00022263	nomet - CTL; CTL - SAM; nomet - SAM
L-Glutamic acid	65.845	8.2748e-05	4.0822	0.00022263	nomet - CTL; CTL - SAM; nomet - SAM
Adenosine triphosphate	64.916	8.619e-05	4.0645	0.0002265	SAM - CTL; SAM - nomet
Glycine	62.55	9.5863e-05	4.0183	0.00024619	nomet - CTL; CTL - SAM; nomet - SAM
L-Isoleucine	48.007	0.00020346	3.6915	0.00050629	nomet - CTL; SAM - CTL; nomet - SAM
D-Ribose 5-phosphate	47.788	0.0002061	3.6859	0.00050629	nomet - CTL; CTL - SAM; nomet - SAM
ADP	47.279	0.00021242	3.6728	0.00051071	nomet - CTL; SAM - CTL; nomet - SAM
NADP	42.743	0.00028209	3.5496	0.00066408	CTL - nomet; SAM - nomet
Fumaric acid	41.576	0.00030484	3.5159	0.000703	nomet - CTL; SAM - CTL
Guanosine diphosphate	38.856	0.0003682	3.4339	0.00083212	nomet - CTL; nomet - SAM
Creatine	37.933	0.00039369	3.4049	0.00087228	CTL - nomet; SAM - nomet
Xanthylic acid	36.729	0.00043056	3.366	0.00093565	SAM - CTL; SAM - nomet
4-Hydroxy-L-proline	32.531	0.00060193	3.2205	0.0012596	nomet - CTL; nomet - SAM
4-Hydroxyproline	32.531	0.00060193	3.2205	0.0012596	nomet - CTL; nomet - SAM
3-Phosphoglyceric acid	28.697	0.00084785	3.0717	0.0017419	nomet - CTL; nomet - SAM
Carnosine	27.487	0.00095285	3.021	0.0019227	CTL - nomet; SAM - CTL; SAM - nomet
NAD	26.502	0.0010515	2.9782	0.0020845	nomet - CTL; nomet - SAM
Phosphocreatine	25.426	0.0011755	2.9298	0.0022903	CTL - nomet; SAM - CTL; SAM - nomet
Guanosine monophosphate	24.899	0.0012434	2.9054	0.0023815	nomet - CTL; nomet - SAM
Uric acid	22.733	0.0015844	2.8001	0.002984	CTL - nomet; CTL - SAM
Cyclic AMP	22.562	0.0016165	2.7914	0.0029944	CTL - nomet; SAM - nomet
Dihydroxyacetone phosphate	22.231	0.001681	2.7744	0.0030637	CTL - SAM; nomet - SAM
Argininosuccinic acid	21.36	0.0018677	2.7287	0.00335	nomet - CTL; SAM - CTL
L-Malic acid	16.507	0.0036374	2.4392	0.0063234	nomet - CTL; SAM - CTL
Malic acid	16.507	0.0036374	2.4392	0.0063234	nomet - CTL; SAM - CTL
D-2-Hydroxyglutaric acid	15.049	0.0045918	2.338	0.0077444	CTL - nomet; CTL - SAM
L-2-Hydroxyglutaric acid	15.049	0.0045918	2.338	0.0077444	CTL - nomet; CTL - SAM
6-Phosphogluconic acid	14.695	0.004873	2.3122	0.0080977	CTL - SAM; nomet - SAM
Guanosine triphosphate	14.283	0.0052305	2.2815	0.0085658	CTL - nomet; CTL - SAM
Adenosine monophosphate	12.856	0.0067731	2.1692	0.010934	nomet - CTL; SAM - CTL
Citrulline	11.72	0.0084647	2.0724	0.013472	nomet - CTL; nomet - SAM
Pyruvic acid	11.643	0.0086	2.0655	0.013497	SAM - CTL; SAM - nomet
D-Arginine	11.091	0.0096512	2.0154	0.014602	nomet - CTL; SAM - CTL
L-Arginine	11.091	0.0096512	2.0154	0.014602	nomet - CTL; SAM - CTL
Oxoglutaric acid	11.071	0.0096913	2.0136	0.014602	CTL - nomet; CTL - SAM
2-Phospho-D-glyceric acid	10.753	0.010379	1.9838	0.015432	nomet - CTL; nomet - SAM
NADH	10.423	0.011163	1.9522	0.016283	nomet - CTL; nomet - SAM
Guanosine	10.393	0.01124	1.9492	0.016283	SAM - nomet
Galactose 1-phosphate	9.8172	0.012823	1.892	0.018341	CTL - nomet; CTL - SAM
D-Glutamine	9.3204	0.014437	1.8405	0.020141	CTL - nomet; CTL - SAM
L-Glutamine	9.3204	0.014437	1.8405	0.020141	CTL - nomet; CTL - SAM
cis-Aconitic acid	9.1705	0.014977	1.8246	0.020639	nomet - CTL; SAM - CTL
Isocitric acid	9.0813	0.015312	1.815	0.020846	nomet - CTL
Spermine	8.9677	0.015752	1.8027	0.02119	CTL - SAM
D-Glyceraldehyde 3-phosphate	8.4759	0.017865	1.748	0.023665	nomet - SAM
3-Hydroxy-3-methylglutaryl-CoA	8.4449	0.01801	1.7445	0.023665	SAM - CTL
Glutathione	7.282	0.024839	1.6049	0.032262	CTL - nomet; SAM - nomet
NADPH	6.9661	0.027277	1.5642	0.035026	nomet - CTL
Fructose 6-phosphate	6.6543	0.030005	1.5228	0.038097	nomet - SAM
Spermidine	6.4685	0.031807	1.4975	0.039935	SAM - nomet
Adenosine diphosphate ribose	6.1256	0.035528	1.4494	0.044117	CTL - SAM; nomet - SAM
