# Supplementary material for: Excess S-adenosylmethionine inhibits methylation via catabolism to adenine
Source: Commun Biol. 2022 Apr 5;5:313. doi: 10.1038/s42003-022-03280-5 (PMC8983724; doi:10.1038/s42003-022-03280-5)
Supplement: Supplementary file 5 — Supplementary Data 2 [file 42003_2022_3280_MOESM5_ESM.xlsx]

## Sheet: Metabolites
Putative Metabolites
ID	HMT DB †				m/z	MT/RT	Relative Area
	Compound name	Pathway Label	PubChem CID	HMDB ID			Control			Adenine			SAM			Control		Adenine		SAM
							1	2	3	4	5	6	7	8	9	Mean	S.D.	Mean	S.D.	Mean	S.D.
C_0034	1-Aminocyclopentanecarboxylic acid	1-Aminocyclopentanecarboxylic acid	2901		130.087	9.13341	N.D.	0.00251226	0.00266867	N.D.	0.00202115	0.00184508	0.00244644	0.00209672	0.00222017	0.00259046	0.000110601	0.00193311	0.000124505	0.00225444	0.000177364
C_0010	1-Aminocyclopropane-1-carboxylic acid Homoserinelactone	1-Aminocyclopropane-1-carboxylic acid Homoserinelactone	535 73508		102.055	6.79709	0.00147699	N.D.	0.00161868	N.D.	N.D.	0.00239798	0.00587075	0.0051062	0.00505737	0.00154783	0.000100189	0.00239798	N.A.	0.00534477	0.000456161
C_0052	1-Methyl-4-imidazoleacetic acid	MIA	75810	HMDB0002820	141.066	7.89038	0.00189034	0.00203415	0.0019401	0.00206019	0.00232808	0.0019036	0.00281001	0.00233152	0.00259885	0.00195486	7.30356e-05	0.00209729	0.000214658	0.00258013	0.000239791
C_0073	1-Methylhistidine 3-Methylhistidine	1-Methylhistidine 3-Methylhistidine	92105 64969	HMDB0000001 HMDB0000479	170.093	7.17006	0.00889478	0.0102996	0.0102741	0.00713807	0.00776462	0.00747579	0.00982159	0.00813222	0.00911711	0.00982283	0.000803807	0.00745949	0.000313592	0.00902364	0.000848555
C_0048	1-Methylnicotinamide	1-Methylnicotinamide	457	HMDB0000699	137.072	7.04527	0.0164509	0.018235	0.0177296	0.0122762	0.0134885	0.0116696	0.0155741	0.0147713	0.0137958	0.0174719	0.000919552	0.0124781	0.000926122	0.0147137	0.000890564
C_0020	1-Pyrroline 5-carboxylic acid	P5C	440162	HMDB0001301	114.056	10.5573	0.00360945	0.00437881	0.0045346	0.00178375	0.00258766	0.00269215	0.00547853	0.0065233	0.00636833	0.00417429	0.000495324	0.00235452	0.000497057	0.00612339	0.000563814
C_0051	1H-Imidazole-4-propionic acid	1H-Imidazole-4-propionic acid	10105257		141.066	7.75571	0.0030318	0.00287745	0.00210164	0.00209725	0.00189218	0.00208842	0.00364459	0.00343941	0.00307171	0.0026703	0.000498482	0.00202595	0.000115934	0.00338524	0.000290256
C_0090	2'-Deoxycytidine	dCyt	13711	HMDB0000014	228.096	9.00961	0.00140262	0.000873292	0.00105989	0.00042779	0.000468555	0.000383492	0.000453111	N.D.	N.D.	0.00111193	0.000268474	0.000426612	4.25434e-05	0.000453111	N.A.
C_0029	2-Amino-2-(hydroxymethyl)-1,3-propanediol	2-Amino-2-(hydroxymethyl)-1,3-propanediol	6503		122.081	7.91617	N.D.	N.D.	0.00101703	N.D.	N.D.	N.D.	N.D.	N.D.	N.D.	0.00101703	N.A.	N.A.	N.A.	N.A.	N.A.
C_0012	2-Aminoisobutyric acid 2-Aminobutyric acid	2-Aminoisobutyric acid 2-Aminobutyric acid	6119 6657	HMDB0001906 HMDB0000452	104.071	9.17517	0.00775332	0.0078314	0.00680602	0.00524159	0.00578265	0.00567846	0.0056218	0.00648527	0.00668549	0.00746358	0.0005708	0.00556756	0.000287072	0.00626419	0.000565258
A_0050	2-Deoxyglucose 6-phosphate	2-Deoxyglucose 6-phosphate	440992		243.029	10.2199	N.D.	N.D.	0.00148905	N.D.	N.D.	N.D.	N.D.	N.D.	N.D.	0.00148905	N.A.	N.A.	N.A.	N.A.	N.A.
A_0022	2-Hydroxyglutaric acid	2-Hydroxyglutaric acid	43	HMDB0000606,HMDB0000694	147.03	16.6962	0.00899395	0.00834055	0.00797187	0.00604686	0.00606801	0.00648552	0.00470149	0.00462741	0.00486829	0.00843546	0.000517607	0.00620013	0.000247383	0.0047324	0.000123378
A_0012	2-Hydroxyvaleric acid	2-Hydroxyvaleric acid	98009	HMDB0001863	117.055	9.08197	0.00145631	N.D.	0.00132716	0.00109209	0.0010395	0.00106927	N.D.	0.000979987	N.D.	0.00139173	9.13182e-05	0.00106695	2.63712e-05	0.000979987	N.A.
A_0021	2-Oxoglutaric acid	2-OG	51	HMDB0000208	145.014	20.8671	0.0281839	0.0306928	0.0277139	0.0247686	0.0280511	0.0270097	0.0129792	0.0114025	0.0126267	0.0288635	0.00160154	0.0266098	0.00167739	0.0123361	0.000827552
A_0010	2-Oxoisovaleric acid	2-KIV	49	HMDB0000019	115.04	10.1093	0.00296683	N.D.	0.00271125	N.D.	0.00238112	0.00273819	N.D.	N.D.	N.D.	0.00283904	0.000180717	0.00255965	0.000252487	N.A.	N.A.
A_0062	3'-CMP 2'-CMP	3'-CMP 2'-CMP	66535 101544	HMDB0011692	322.045	9.76099	0.000938467	0.000996812	N.D.	N.D.	N.D.	N.D.	0.000471868	N.D.	N.D.	0.000967639	4.12562e-05	N.A.	N.A.	0.000471868	N.A.
A_0007	3-Hydroxybutyric acid	3-HBA	441	HMDB0000011,HMDB0000357,HMDB0000442	103.04	9.48755	0.0096333	0.0101971	0.00956944	0.00982527	0.00840304	0.00687716	0.0102359	0.0100327	0.00953068	0.00979996	0.000345445	0.00836849	0.00147436	0.00993309	0.000363013
A_0005	3-Hydroxypropionic acid	b-Lactate	68152	HMDB0000700	89.0252	10.8031	N.D.	N.D.	N.D.	0.00232815	N.D.	N.D.	0.0037119	N.D.	N.D.	N.A.	N.A.	0.00232815	N.A.	0.0037119	N.A.
C_0069	3-Methylguanine	3-Methylguanine	76292	HMDB0001566	166.074	8.1832	0.00107056	0.00112381	N.D.	N.D.	N.D.	N.D.	N.D.	N.D.	N.D.	0.00109718	3.76574e-05	N.A.	N.A.	N.A.	N.A.
C_0053	4-Guanidinobutyric acid	4-GBA	500	HMDB0003464	146.093	7.90149	0.00172949	0.00156663	0.00142417	0.00214667	0.00196564	0.00177885	0.00212049	0.00190821	0.00197989	0.00157343	0.000152775	0.00196372	0.000183919	0.00200286	0.000107988
A_0014	4-Methyl-2-oxovaleric acid 3-Methyl-2-oxovaleric acid	2-Oxoleucine 2K3MVA	70 47	HMDB0000695 HMDB0000491	129.055	9.48745	0.0141723	0.0139967	0.015193	0.0143481	0.0133701	0.0145782	0.00933802	0.00816114	0.0086813	0.014454	0.000645982	0.0140988	0.000641484	0.00872682	0.000589761
C_0108	5'-Deoxy-5'-methylthioadenosine	MTA	439176	HMDB0001173	298.099	9.62726	0.00118643	0.000832715	0.00106648	0.00506398	0.00390843	0.00457727	0.0756589	0.0622236	0.0682543	0.00102854	0.000179885	0.00451656	0.000580163	0.0687122	0.00672935
A_0068	5-Aminoimidazole-4-carboxamide ribotide	AICAR	65110	HMDB0001517	337.056	9.42229	0.0300216	0.034986	0.0332911	N.D.	N.D.	N.D.	N.D.	N.D.	N.D.	0.0327662	0.0025235	N.A.	N.A.	N.A.	N.A.
A_0013	5-Oxoproline	Oxoproline	7405	HMDB0000267	128.035	9.43917	0.101936	0.1046	0.10161	0.0893984	0.0898355	0.0799681	0.101299	0.0965458	0.0915728	0.102715	0.00164015	0.0864007	0.00557507	0.0964725	0.00486343
A_0055	6-Phosphogluconic acid	6-PG	91493	HMDB0001316	275.017	14.519	0.00471664	0.00522998	0.00556661	0.00310946	0.0040368	0.00441035	0.00723659	0.00696278	0.00723809	0.00517107	0.000428037	0.00385221	0.000669801	0.00714582	0.00015852
A_0082	Acetyl CoA_divalent	AcCoA	444493		403.557	10.2153	0.000560837	0.00161442	N.D.	N.D.	N.D.	N.D.	N.D.	0.00123265	0.0011086	0.00108763	0.000744997	N.A.	N.A.	0.00117063	8.7717e-05
C_0046	Adenine	Adenine	190	HMDB0000034	136.062	7.29812	N.D.	N.D.	0.000878568	0.331364	0.351037	0.339865	0.0682174	0.0520641	0.0582876	0.000878568	N.A.	0.340755	0.00986664	0.059523	0.00814725
C_0103	Adenosine	Adenosine	60961	HMDB0000050	268.105	9.41851	0.00143548	0.00168836	0.00143241	0.00143163	0.000827725	0.00129987	0.00119098	0.000934263	0.00114372	0.00151875	0.000146896	0.00118641	0.000317538	0.00108966	0.000136634
A_0086	Adenosine 5'-phosphosulfate	Adenosine 5'-phosphosulfate	10238	HMDB0001003	426.013	10.0878	0.00220035	0.00228647	0.00232876	0.00427003	0.00416311	0.0031412	0.00388002	0.00374849	0.00395273	0.00227186	6.5441e-05	0.00385811	0.000623164	0.00386041	0.00010352
A_0087	ADP	ADP	6022	HMDB0001341	426.023	10.8268	0.0567342	0.0474865	0.0482351	0.116139	0.102325	0.0883338	0.0972068	0.0983741	0.0891865	0.0508186	0.00513673	0.102266	0.0139026	0.0949224	0.00500166
A_0098	ADP-glucose GDP-fucose	ADP-Glc GDP-fucose	16500 10918995	HMDB0006557 HMDB0001095	588.076	8.30898	0.00396511	0.00424443	0.00409535	0.00623824	0.00641109	0.00580951	0.0067972	0.00680396	0.0062637	0.00410163	0.000139763	0.00615295	0.00030973	0.00662162	0.000309986
C_0006	Ala	Ala	602	HMDB0000161,HMDB0001310	90.0554	8.63162	0.398864	0.385766	0.399815	0.427863	0.402057	0.424142	0.41299	0.375011	0.421734	0.394815	0.00785123	0.418021	0.0139493	0.403245	0.024839
A_0071	AMP	AMP	6083	HMDB0000045	346.056	9.25189	0.00907807	0.0073888	0.00701119	0.0210868	0.0166951	0.0138599	0.0127901	0.0137397	0.0124061	0.00782602	0.00110063	0.0172139	0.00364124	0.0129786	0.000686495
C_0075	Arg	Arg	6322	HMDB0000517,HMDB0003416	175.119	6.8142	0.172669	0.201596	0.191307	0.15032	0.163957	0.151744	0.402497	0.382069	0.400113	0.188524	0.014663	0.15534	0.00749596	0.394893	0.0111698
C_0107	Argininosuccinic acid	ArgSuccinate	16950	HMDB0000052	291.131	8.99854	0.00362329	0.00394834	0.00345328	0.0029621	0.00352967	0.0035115	0.00489289	0.00467131	0.0052073	0.00367497	0.000251541	0.00333442	0.000322569	0.00492383	0.000269332
C_0041	Asn	Asn	236	HMDB0000168,HMDB0033780	133.061	9.98671	0.074427	0.0838219	0.0778283	0.0846298	0.0872148	0.0828313	0.0876744	0.081648	0.0893161	0.0786924	0.00475668	0.084892	0.00220351	0.0862128	0.00403761
C_0045	Asp	Asp	424	HMDB0000191,HMDB0006483	134.045	11.0007	0.0995202	0.102812	0.105488	0.0938265	0.104251	0.0990534	0.103462	0.0985176	0.102408	0.102607	0.00298895	0.0990436	0.00521221	0.101463	0.00260419
A_0094	ATP	ATP	5957	HMDB0000538	505.989	11.7416	0.756264	0.775606	0.749343	0.945237	1.04282	1.04195	1.09342	1.05621	1.03419	0.760404	0.0136121	1.01	0.0560916	1.06127	0.0299412
C_0024	Betaine	Betaine	247	HMDB0000043	118.087	10.7463	0.0495033	0.0508573	0.0487053	0.037227	0.0422107	0.0351858	0.0421107	0.0363552	0.040803	0.0496887	0.00108792	0.0382078	0.00361372	0.0397563	0.00301713
C_0091	Butyrylcarnitine	Butyrylcarnitine	439829	HMDB0002013	232.156	9.15169	0.00859385	0.00810133	0.00810656	0.00904845	0.0102151	0.00940095	0.00675369	0.00581723	0.00615304	0.00826725	0.00028286	0.00955485	0.000598377	0.00624132	0.000474428
C_0067	Carnitine	Carnitine	85	HMDB0000062	162.113	8.14611	0.00960215	0.0090099	0.0108708	0.0102716	0.0140762	0.0121362	0.00608745	0.00627362	0.00678545	0.00982763	0.000950739	0.0121613	0.00190244	0.00638217	0.000361439
C_0089	Carnosine	Carnosine	439224	HMDB0000033	227.115	6.488	0.0013957	0.0018348	0.00180164	0.0013853	0.00172892	0.00136301	0.00169245	0.00158907	0.00131865	0.00167738	0.000244503	0.00149241	0.000205124	0.00153339	0.000193024
A_0080	CDP	CDP	6132	HMDB0001546	402.012	11.4236	0.00319116	0.00279333	0.00228428	N.D.	N.D.	N.D.	N.D.	N.D.	N.D.	0.00275626	0.000454573	N.A.	N.A.	N.A.	N.A.
C_0014	Choline	Choline	305	HMDB0000097	104.108	6.57944	0.0770956	0.093975	0.0967563	0.105164	0.109433	0.111599	0.116564	0.111027	0.107629	0.0892756	0.0106395	0.108732	0.00327453	0.11174	0.00451005
A_0032	cis-Aconitic acid	cis-Aconitic acid	643757	HMDB0000072	173.009	27.3865	0.0156829	0.0165572	0.0139761	0.0123764	0.0143362	0.0136389	N.D.	N.D.	N.D.	0.0154054	0.00131272	0.0134505	0.000993392	N.A.	N.A.
A_0039	Citric acid	Citric acid	311	HMDB0000094	191.019	25.7485	0.25301	0.239227	0.227583	0.220414	0.224311	0.217794	0.170503	0.170011	0.172701	0.23994	0.0127284	0.22084	0.00327955	0.171072	0.00143262
C_0076	Citrulline	Citrulline	9750	HMDB0000904	176.104	10.5289	0.00531473	0.00696516	0.00590602	0.00477982	0.00418597	0.00466505	0.00638475	0.00643401	0.0061415	0.00606197	0.000836194	0.00454361	0.000314998	0.00632009	0.000156608
A_0063	CMP	CMP	6131	HMDB0000095	322.045	9.5626	0.000654309	N.D.	0.000752533	N.D.	N.D.	N.D.	N.D.	N.D.	0.000575444	0.000703421	6.94546e-05	N.A.	N.A.	0.000575444	N.A.
A_0101	CMP-N-acetylneuraminate	CMP-NeuNAc	448209	HMDB0001176	613.141	8.16632	0.0146229	0.0145523	0.0143106	0.00931961	0.00994948	0.00908883	0.0109275	0.0114242	0.011075	0.0144953	0.000163783	0.00945264	0.00044548	0.0111422	0.000255069
A_0076	CoA_divalent	CoA	87642		382.55	10.5801	0.00737313	0.00755587	0.00664115	0.0067878	0.00679856	0.00650502	0.00728435	0.00850044	0.00738517	0.00719005	0.000484064	0.00669713	0.000166452	0.00772332	0.00067489
C_0038	Creatine	Creatine	586	HMDB0000064	132.077	8.4661	0.814719	0.875716	0.83086	0.879138	0.9191	0.877643	1.08316	0.974535	1.08789	0.840432	0.0316047	0.89196	0.0235157	1.04853	0.0641235
C_0021	Creatinine	Creatinine	588	HMDB0000562	114.067	7.00078	0.0170044	0.018909	0.0194867	0.0155379	0.0162786	0.0154552	0.0185811	0.0170416	0.019376	0.0184667	0.00129894	0.0157572	0.000453408	0.0183329	0.00118683
A_0091	CTP	CTP	6176	HMDB0000082	481.977	12.3079	0.0645149	0.0726903	0.0703574	0.00406285	0.00434234	0.00460536	0.0072022	0.00754391	0.00798635	0.0691875	0.00421138	0.00433685	0.000271297	0.00757749	0.000393153
C_0028	Cys	Cys	594	HMDB0000574,HMDB0003417	122.027	10.7698	0.00139743	0.00269044	N.D.	0.000977585	0.000830991	0.000763904	N.D.	N.D.	N.D.	0.00204394	0.000914299	0.000857493	0.000109278	N.A.	N.A.
C_0088	Cystathionine	Cystathionine	834	HMDB0000099	223.076	9.44546	N.D.	N.D.	N.D.	N.D.	N.D.	N.D.	0.00247868	0.00218436	0.00244507	N.A.	N.A.	N.A.	N.A.	0.00236937	0.000161104
C_0118	Cysteine glutathione disulfide	Cysteine glutathione disulfide	10455148	HMDB0000656	427.096	11.0835	0.00162745	0.0111429	0.00206043	0.00113665	0.00222849	0.00161252	0.00107278	0.000944184	0.000834245	0.00494358	0.00537309	0.00165922	0.000547415	0.000950404	0.00011939
A_0083	dADP	dADP	188966	HMDB0001508	410.029	10.9386	N.D.	N.D.	N.D.	0.000632076	N.D.	N.D.	N.D.	N.D.	N.D.	N.A.	N.A.	0.000632076	N.A.	N.A.	N.A.
A_0093	dATP	dATP	15993	HMDB0001532	489.994	11.6908	0.00223961	0.00228459	0.00206013	0.00437713	0.00426041	0.00467361	0.00491545	0.00463644	0.00451714	0.00219478	0.00011876	0.00443705	0.000213017	0.00468968	0.000204423
A_0089	dCTP	dCTP	65091	HMDB0000998	465.983	12.4048	0.00207696	0.00192417	0.00218466	N.D.	N.D.	N.D.	N.D.	N.D.	N.D.	0.00206193	0.000130896	N.A.	N.A.	N.A.	N.A.
C_0016	Diethanolamine	Diethanolamine	8113	HMDB0004437	106.087	7.32946	0.0086025	0.00631769	0.00951096	0.00362927	0.00796706	0.00202989	0.00232108	0.0636539	0.0176249	0.00814372	0.00164532	0.00454207	0.00307204	0.0278666	0.0319233
A_0029	Dihydroxyacetone phosphate	DHAP	668	HMDB0001473	168.991	12.5148	0.0462914	0.0489639	0.0438159	0.0341462	0.0526508	0.0356777	0.0391689	0.0471819	0.0457947	0.0463571	0.00257462	0.0408249	0.0102702	0.0440485	0.00428241
A_0090	dTTP	dTTP	64968	HMDB0001342	480.983	12.0743	0.0048475	0.004832	0.0048372	0.000809409	N.D.	0.000599639	0.00141943	0.00140591	N.D.	0.0048389	7.88565e-06	0.000704524	0.00014833	0.00141267	9.55647e-06
C_0002	Ethanolamine	Ethanolamine	700	HMDB0000149	62.0598	6.09317	N.D.	N.D.	0.00111099	N.D.	N.D.	N.D.	0.00145067	0.00153947	N.D.	0.00111099	N.A.	N.A.	N.A.	0.00149507	6.27868e-05
A_0019	Ethanolamine phosphate	EAP	1015	HMDB0000224	140.012	8.02491	0.00104129	0.000968653	0.00133606	0.00325344	0.00365275	0.0031217	0.00204413	0.00224874	0.00211977	0.00111533	0.000194573	0.00334263	0.000276535	0.00213754	0.000103457
A_0078	FAD_divalent	FAD	643975		391.573	7.88598	0.00104503	0.000948004	0.00112791	0.000958649	0.00129212	0.000895396	0.00110994	0.00133913	0.000994617	0.00104031	9.00457e-05	0.00104872	0.000213148	0.0011479	0.000175367
A_0069	Fructose 1,6-diphosphate	F1,6P	172313	HMDB0001058	338.989	14.4398	0.396885	0.338235	0.331107	0.400879	0.38845	0.352362	0.409704	0.452709	0.413125	0.355409	0.0360958	0.380563	0.0252016	0.425179	0.0239026
A_0053	Fructose 6-phosphate	F6P	603	HMDB0000124	259.023	9.91173	0.0216352	0.0161067	0.0139761	0.00959527	0.0102226	0.00852007	0.011449	0.0128445	0.0143328	0.0172393	0.00395317	0.00944598	0.000861021	0.0128754	0.00144213
A_0009	Fumaric acid	Fumaric acid	444972	HMDB0000134	115.003	24.5445	0.00785919	0.00864467	0.00729228	0.00910892	0.00815383	0.00904008	0.00686406	0.0054161	0.00513303	0.00793204	0.000679132	0.00876761	0.000532662	0.0058044	0.000928545
C_0011	GABA	GABA	119	HMDB0000112	104.071	7.37023	0.0224246	0.0213313	0.0217944	0.0243439	0.0256334	0.025272	0.00440575	0.00335177	0.00434999	0.0218501	0.000548799	0.0250831	0.000665178	0.00403584	0.000593074
A_0088	GDP	GDP	8977	HMDB0001201	442.017	10.6445	0.0110204	0.00800265	0.00828676	0.0166693	0.0150087	0.0131726	0.013879	0.0151167	0.013033	0.00910328	0.00166637	0.0149502	0.00174909	0.0140096	0.00104798
A_0099	GDP-glucose GDP-mannose GDP-galactose	GDP-glucose GDP-Man GDP-galactose	46173703 18396 439695	HMDB0003351 HMDB0001163	604.071	8.29409	0.00254059	0.002523	0.0025458	0.00226494	0.00308265	0.00256431	0.00394688	0.00350485	0.00307026	0.00253647	1.19462e-05	0.0026373	0.000413713	0.00350733	0.000438316
C_0056	Gln	Gln	738	HMDB0000641,HMDB0003423	147.077	10.2498	0.342511	0.402044	0.409024	0.701054	0.676141	0.669277	0.466099	0.407552	0.454788	0.384526	0.0365536	0.682157	0.0167207	0.442813	0.0310565
C_0058	Glu	Glu	611	HMDB0000148,HMDB0003339	148.061	10.4079	3.64416	3.75003	3.79385	3.4952	3.49275	3.40788	3.06771	2.99183	3.17529	3.72935	0.0769615	3.46528	0.0497227	3.07828	0.092185
C_0077	Gluconolactone	1,5-Gluconolactone	7027	HMDB0000150	179.057	21.6419	0.0108768	0.010476	0.00803404	0.00916737	0.0100976	0.00941173	0.00954579	0.00842159	0.0101916	0.0097956	0.00153866	0.0095589	0.00048226	0.00938634	0.000895726
A_0052	Glucose 1-phosphate	G1P	65533	HMDB0001586	259.023	10.0332	0.0253068	0.0201427	0.0188631	0.0276147	0.027312	0.0227619	0.0354608	0.0367775	0.0361463	0.0214376	0.0034114	0.0258962	0.00271861	0.0361282	0.00065852
A_0051	Glucose 6-phosphate	G6P	5958	HMDB0001401	259.023	9.80505	0.0262733	0.0247833	0.0252463	0.0209691	0.0235329	0.0213822	0.0306523	0.0287517	0.0304305	0.0254343	0.000762612	0.0219614	0.00137655	0.0299448	0.00103924
C_0111	Glutathione (GSH)	GSH	124886	HMDB0000125	308.092	12.5838	1.17073	1.09771	1.10477	1.33131	1.28719	1.23726	0.895828	0.906387	0.884944	1.1244	0.0402741	1.28525	0.0470581	0.89572	0.0107221
C_0110	Glutathione (GSSG)_divalent	GSSG	65359		307.084	11.5997	0.307177	0.396815	0.418787	0.22831	0.292928	0.282209	0.250966	0.202148	0.264117	0.37426	0.0591249	0.267816	0.0346301	0.239077	0.0326506
C_0003	Gly	Gly	750	HMDB0000123	76.0399	7.91878	1.77146	1.81234	1.91188	2.07198	2.05794	2.00727	2.20036	2.08103	2.20164	1.8319	0.0722238	2.04573	0.0340354	2.16101	0.0692683
C_0082	Gly-Asp	Gly-Asp	97363		191.067	9.43457	0.0115547	0.0109788	0.0116373	0.00950713	0.00957353	0.00916069	0.00988607	0.0101314	0.0106184	0.0113903	0.000358756	0.00941379	0.000221686	0.0102119	0.000372736
C_0042	Gly-Gly	Gly-Gly	11163	HMDB0011733	133.062	7.99663	0.00534413	0.00566317	0.00576591	0.00446631	0.00446841	0.00371171	0.00490005	0.00527321	0.00654517	0.00559107	0.000219938	0.00421548	0.000436276	0.00557281	0.000862511
A_0030	Glyceraldehyde 3-phosphate	GAP	729	HMDB0001112	168.991	11.5458	0.00652627	0.00654967	0.00571071	0.00709857	0.0061397	0.00588751	0.00869995	0.00887041	0.00859857	0.00626222	0.000477761	0.00637526	0.00063897	0.00872298	0.000137378
C_0009	Glycerol	Glycerol	753	HMDB0000131	93.0549	20.8944	0.317687	0.259017	0.35391	0.385606	0.287962	0.409696	0.331515	0.286815	0.416054	0.310205	0.0478871	0.361088	0.0644642	0.344795	0.0656347
A_0031	Glycerol 3-phosphate	G3P	439162	HMDB0000126	171.006	12.018	0.0220409	0.0267356	0.0247411	0.0152594	0.0159868	0.0176967	0.0251217	0.023018	0.0240712	0.0245058	0.00235617	0.0163143	0.00125121	0.0240703	0.00105189
C_0101	Glycerophosphocholine	GPCho	439285	HMDB0000086	258.111	20.5293	0.721936	0.747785	0.776925	0.890512	0.889609	0.87958	0.980257	0.91741	0.962867	0.748882	0.027511	0.886567	0.00606751	0.953511	0.0324515
A_0073	GMP	GMP	6804	HMDB0001397	362.05	9.15393	0.00123384	0.000749017	0.000951785	0.0023141	0.00187417	0.00166729	0.00133346	0.00181379	0.0016914	0.000978214	0.00024349	0.00195185	0.00033033	0.00161288	0.000249606
A_0095	GTP	GTP	6830	HMDB0001273	521.983	11.4478	0.0979258	0.102371	0.100233	0.101101	0.115574	0.112553	0.121005	0.11527	0.110612	0.100177	0.00222326	0.109743	0.00763502	0.115629	0.00520553
C_0105	Guanosine	Guanosine	6802	HMDB0000133	284.101	11.8816	N.D.	N.D.	N.D.	0.00134978	0.00132567	0.000867093	0.00139336	0.00142372	0.000974567	N.A.	N.A.	0.00118085	0.000271985	0.00126388	0.000251013
C_0064	His	His	773	HMDB0000177	156.077	6.98965	0.130907	0.15446	0.156947	0.129891	0.13399	0.12618	0.146597	0.135792	0.149082	0.147438	0.0143701	0.13002	0.00390689	0.143824	0.00706553
C_0026	Homoserine	Homoserine	12647	HMDB0000719	120.066	9.61963	N.D.	N.D.	N.D.	N.D.	N.D.	N.D.	0.450472	0.417564	0.460653	N.A.	N.A.	N.A.	N.A.	0.442896	0.0225212
C_0037	Hydroxyproline	Hydroxyproline	5810	HMDB0000725	132.066	11.4614	0.0266844	0.0294873	0.0301252	0.0248767	0.0265901	0.022894	0.0242298	0.0246745	0.0265459	0.0287656	0.00183041	0.0247869	0.00184965	0.0251501	0.00122911
C_0017	Hypotaurine	Hypotaurine	107812	HMDB0000965	110.028	17.2573	0.0697522	0.0681662	0.0680998	0.0832306	0.0862304	0.0849289	0.0676479	0.0671164	0.0652691	0.0686727	0.000935455	0.0847966	0.00150424	0.0666778	0.00124859
C_0047	Hypoxanthine	Hypoxanthine	790	HMDB0000157	137.047	10.5521	N.D.	N.D.	N.D.	0.0140012	0.0123636	0.012261	0.0114442	0.0090053	0.00988215	N.A.	N.A.	0.0128753	0.000976458	0.0101105	0.00123539
C_0039	Ile	Ile	791	HMDB0000172	132.102	9.75327	0.484416	0.540259	0.507105	0.438117	0.476166	0.460237	0.548641	0.5039	0.547344	0.510593	0.0280846	0.458173	0.0191081	0.533295	0.0254649
C_0065	Imidazolelactic acid	Imidazolelactic acid	793		157.062	8.44544	0.000780002	N.D.	0.00120329	0.000816971	N.D.	N.D.	N.D.	0.00124844	0.00147435	0.000991647	0.000299312	0.000816971	N.A.	0.00136139	0.00015974
A_0072	IMP	IMP	8582	HMDB0000175	347.041	9.57558	0.00309582	0.0018228	0.00214552	0.0147274	0.00690097	0.00554138	0.00480847	0.00576983	0.0044289	0.00235471	0.000661791	0.00905658	0.00495788	0.0050024	0.000691181
C_0104	Inosine	Inosine	6021	HMDB0000195	269.089	18.5048	0.00947416	0.00456935	0.00469614	0.0331267	0.0206344	0.0157062	0.0155831	0.0168349	0.0144936	0.00624655	0.00279592	0.0231558	0.00897976	0.0156372	0.00117161
A_0040	Isocitric acid	Isocitric acid	1198	HMDB0000193	191.019	27.9435	0.0182048	0.0168275	0.0166963	0.0150698	N.D.	0.0164373	N.D.	N.D.	N.D.	0.0172429	0.000835613	0.0157535	0.000966968	N.A.	N.A.
C_0096	Isovalerylcarnitine	Isovalerylcarnitine	6426851	HMDB0000688	246.17	9.362	N.D.	0.00184009	N.D.	0.00155672	N.D.	0.00163716	0.00157246	N.D.	0.00174538	0.00184009	N.A.	0.00159694	5.68759e-05	0.00165892	0.000122274
C_0087	Kynurenine	Kynurenine	846	HMDB0000684	209.093	9.415	N.D.	0.00141138	0.00148351	0.00116291	0.000878336	0.00127523	0.00143635	0.000856545	0.00112835	0.00144745	5.10039e-05	0.00110549	0.000204581	0.00114041	0.000290088
A_0004	Lactic acid	Lactic acid	612	HMDB0000190,HMDB0001311	89.0245	10.6693	1.32884	1.30434	1.27877	1.29738	1.2789	1.21952	1.39035	1.31148	1.27772	1.30398	0.0250387	1.26526	0.0406795	1.32651	0.057803
A_0043	Lauric acid	Lauric acid	3893	HMDB0000638	199.172	7.66204	N.D.	N.D.	N.D.	N.D.	N.D.	N.D.	N.D.	0.000987206	N.D.	N.A.	N.A.	N.A.	N.A.	0.000987206	N.A.
C_0040	Leu	Leu	857	HMDB0000687	132.102	9.85456	0.522777	0.576374	0.587929	0.504962	0.537373	0.527404	0.59717	0.553714	0.613485	0.56236	0.0347631	0.523246	0.0166007	0.588123	0.0308959
C_0057	Lys	Lys	866	HMDB0000182,HMDB0003405	147.113	6.60044	0.0867462	0.0973359	0.0948194	0.085751	0.0850304	0.081419	0.212183	0.186639	0.205943	0.0929672	0.00553249	0.0840668	0.00232124	0.201589	0.0133171
A_0017	Malic acid	Malic acid	525	HMDB0000156,HMDB0000744	133.014	20.8536	0.0874662	0.0807417	0.0832074	0.0970448	0.0864047	0.0882948	0.059698	0.0557528	0.0517035	0.0838051	0.00340184	0.0905814	0.00567666	0.0557181	0.00399735
A_0085	Malonyl CoA_divalent	Malonyl-CoA	644066		425.551	11.9185	0.000874905	0.00113385	N.D.	N.D.	0.000619603	0.000637015	N.D.	N.D.	N.D.	0.00100438	0.000183102	0.000628309	1.23122e-05	N.A.	N.A.
C_0060	Met	Met	876	HMDB0000696	150.059	10.2251	0.0807898	0.0816942	0.0758338	0.0742764	0.0698832	0.0688777	0.106119	0.105276	0.103667	0.0794393	0.00315502	0.0710124	0.00287104	0.105021	0.00124569
C_0068	Methionine sulfoxide	Methionine sulfoxide	158980	HMDB0002005	166.053	11.2045	0.0045503	0.00543558	0.00484779	0.00389644	0.00418107	0.00406594	0.00517586	0.00370067	0.00553793	0.00494455	0.000450505	0.00404782	0.00014318	0.00480482	0.000973205
C_0099	Muramic acid	Muramic acid	441038	HMDB0003254	252.106	10.5685	N.D.	N.D.	N.D.	0.000954419	N.D.	N.D.	N.D.	N.D.	N.D.	N.A.	N.A.	0.000954419	N.A.	N.A.	N.A.
A_0054	myo-Inositol 1-phosphate myo-Inositol 3-phosphate	Myoinositol 1-phosphate Myoinositol 3-phosphate	107737 440194	HMDB0000213 HMDB0006814	259.024	10.2119	0.0016339	0.00163319	0.00133428	0.000805897	N.D.	0.000968522	0.00349221	0.00261871	0.00336809	0.00153379	0.000172784	0.00088721	0.000114993	0.00315967	0.000472577
A_0016	N-Acetyl-β-alanine	N-Acetyl-b-alanine	76406		130.052	8.91635	0.000764607	0.000931108	N.D.	0.00123079	0.00123067	0.000950647	N.D.	0.000684005	0.000843862	0.000847858	0.000117734	0.00113737	0.000161707	0.000763934	0.000113036
A_0015	N-Acetylalanine	N-Acetylalanine	88064	HMDB0000766	130.051	8.85367	0.00143948	0.00139854	0.00154954	0.00182951	0.00122896	0.00163316	0.00149393	0.00112978	0.00104977	0.00146252	7.80932e-05	0.00156388	0.000306209	0.00122449	0.000236743
A_0024	N-Acetylcysteine	N-Acetylcysteine	12035	HMDB0001890	162.024	8.87242	0.00034398	0.00038671	0.000558618	N.D.	0.000366982	N.D.	N.D.	N.D.	N.D.	0.000429769	0.000113613	0.000366982	N.A.	N.A.	N.A.
A_0058	N-Acetylglucosamine 1-phosphate	GlcNAc-P	440272	HMDB0001367	300.049	9.51235	0.00255555	0.00211189	0.00222202	0.00220173	0.00247329	0.00226855	0.00421816	0.0042051	0.00353907	0.00229648	0.000231012	0.00231452	0.000141495	0.00398744	0.000388356
A_0037	N-Acetylglutamic acid	N-AcGlu	70914	HMDB0001138	188.058	13.0176	N.D.	0.000557539	N.D.	0.000540776	0.000611068	N.D.	N.D.	0.000499919	N.D.	0.000557539	N.A.	0.000575922	4.97037e-05	0.000499919	N.A.
C_0081	N-Acetyllysine	N-Acetyllysine	92907	HMDB0000446	189.124	9.36417	0.00301278	0.00249991	0.00307581	0.00259145	0.0027248	0.00330974	0.00376279	0.00366595	0.00299098	0.00286283	0.000315878	0.00287533	0.000382072	0.00347324	0.000420448
A_0038	N-Acetylmethionine	N-Acetylmethionine	448580	HMDB0011745	190.055	8.08152	0.0008936	N.D.	0.000852159	0.000898953	N.D.	0.000586638	0.00110612	0.00102511	0.000805254	0.000872879	2.93028e-05	0.000742796	0.00022084	0.000978827	0.000155681
A_0059	N-Acetylneuraminic acid	NeuNAc	439197	HMDB0000230	308.099	7.23304	0.00857706	0.0090126	0.00799322	0.0936017	0.0893986	0.0821798	0.0710152	0.0685756	0.0682149	0.00852763	0.000511488	0.0883933	0.00577695	0.0692686	0.00152334
C_0036	N-Acetylputrescine	N-Acetylputrescine	122356	HMDB0002064	131.119	8.08901	N.D.	N.D.	N.D.	N.D.	N.D.	N.D.	0.00294254	0.00223727	0.00253734	N.A.	N.A.	N.A.	N.A.	0.00257238	0.000353937
C_0059	N-Acetylserine	N-Acetylserine	65249	HMDB0002931	148.062	21.8925	0.00748525	0.00793196	0.0116637	0.00961215	0.0098772	0.00998004	0.00801631	0.00702268	0.0100974	0.00902697	0.00229437	0.00982313	0.000189812	0.00837881	0.00156911
A_0033	N-Carbamoylaspartic acid	Carbamoyl-Asp	93072	HMDB0000828	175.036	15.2354	0.0024789	0.00251925	0.00270592	N.D.	N.D.	N.D.	N.D.	N.D.	0.00139357	0.00256802	0.000121113	N.A.	N.A.	0.00139357	N.A.
A_0034	N-Formylmethionine	N-Formylmethionine	439750	HMDB0001015	176.04	8.71946	N.D.	N.D.	N.D.	N.D.	N.D.	0.000450135	N.D.	N.D.	0.000750099	N.A.	N.A.	0.000450135	N.A.	0.000750099	N.A.
A_0065	N-Glycolylneuraminic acid	GcNeu	440001	HMDB0000833	324.094	7.20451	0.00120393	0.00115825	0.000976692	0.00278991	0.00276175	0.00263094	0.00220078	0.00156293	0.00155903	0.00111296	0.0001202	0.00272753	8.48341e-05	0.00177424	0.000369394
C_0074	N5-Ethylglutamine	N5-Ethylglutamine	439378		175.109	10.8377	0.00372533	0.00436822	0.00387032	0.00318912	0.00318682	0.00332976	0.00358907	0.00357996	0.00398861	0.00398796	0.000337206	0.00323523	8.18694e-05	0.00371922	0.00023335
C_0061	N6-Methyladenine	N6-Methyladenine	67955	HMDB0002099	150.076	7.59975	N.D.	N.D.	N.D.	N.D.	N.D.	N.D.	0.000981443	0.000944184	0.00119562	N.A.	N.A.	N.A.	N.A.	0.00104042	0.000135698
C_0080	N8-Acetylspermidine	N8-Acetylspermidine	123689	HMDB0002189	188.177	6.08885	0.00518156	0.0057355	0.00571152	0.00740525	0.00772054	0.00736028	0.010375	0.0100322	0.0110086	0.00554286	0.000313123	0.00749535	0.000196307	0.0104719	0.000495367
A_0102	NAD+	NAD+	5893	HMDB0000902	662.103	6.61605	0.0568557	0.0575861	0.0533462	0.0462504	0.0461254	0.0422428	0.0494335	0.0504522	0.0473133	0.0559293	0.00226665	0.0448729	0.00227854	0.0490663	0.00160134
A_0103	NADH	NADH	439153	HMDB0001487	664.118	8.17995	0.0147837	0.016728	0.0157587	0.0168062	0.016422	0.0159562	0.0169338	0.0164991	0.0145056	0.0157568	0.000972195	0.0163948	0.000425635	0.0159795	0.0012948
A_0104	NADP+	NADP+	5886	HMDB0000217	742.07	9.36598	0.00451847	0.00417122	0.00375555	0.00339741	0.00350425	0.00277231	0.00250453	0.00236965	0.00187709	0.00414841	0.000381973	0.00322466	0.000395368	0.00225042	0.000330278
A_0075	NADPH_divalent	NADPH	5884		371.537	11.2219	N.D.	0.000934863	0.00100338	0.00124659	0.00127334	0.00183792	N.D.	0.00124529	N.D.	0.00096912	4.8447e-05	0.00145262	0.000333947	0.00124529	N.A.
C_0030	Nicotinamide	Nicotinamide	936	HMDB0001406	123.055	7.08605	0.00165685	0.00158427	0.00182142	0.00181463	0.00143995	0.00154475	0.00154559	0.00121537	0.00181266	0.00168752	0.000121511	0.00159978	0.000193308	0.00152454	0.0002992
C_0085	O-Acetylcarnitine	ALCAR	439756	HMDB0000201	204.124	8.65263	0.014251	0.0131929	0.0128489	0.0215331	0.0223616	0.0205777	0.00963175	0.0105282	0.0109202	0.0134309	0.000730765	0.0214908	0.000892739	0.01036	0.000660462
C_0066	O-Acetylhomoserine 2-Aminoadipic acid	O-Acetylhomoserine 2-Aminoadipic acid	439389 92136	HMDB0000510	162.077	10.4301	0.0127429	0.0126936	0.0107077	0.0131904	0.0157121	0.0140367	0.0111899	0.0127721	0.0123541	0.0120481	0.00116108	0.0143131	0.00128333	0.0121054	0.000819925
A_0045	O-Succinylhomoserine	O-Succinylhomoserine	439406		218.067	12.0651	0.00122262	0.00112446	0.00110122	0.00140286	0.00132114	0.00126753	0.00126659	0.00103232	0.00105713	0.00114944	6.44376e-05	0.00133051	6.81496e-05	0.00111868	0.000128695
A_0020	Octanoic acid	Octanoic acid	379	HMDB0000482	143.108	8.16364	N.D.	N.D.	N.D.	N.D.	N.D.	N.D.	N.D.	N.D.	0.000950494	N.A.	N.A.	N.A.	N.A.	0.000950494	N.A.
C_0063	Octopamine Dopamine	Octopamine Dopamine	440266 681	HMDB0004825 HMDB0000073	154.086	8.27108	0.000352817	N.D.	N.D.	N.D.	0.000261215	N.D.	N.D.	N.D.	N.D.	0.000352817	N.A.	0.000261215	N.A.	N.A.	N.A.
C_0106	Ophthalmic acid	Ophthalmic acid	7018721	HMDB0005765	290.135	12.5678	0.00348666	0.00346847	0.00371207	0.00341923	0.00377456	0.0035731	0.0101834	0.0105861	0.00999364	0.00355573	0.0001357	0.00358896	0.000178194	0.0102544	0.000302548
C_0043	Ornithine	Ornithine	389	HMDB0000214,HMDB0003374	133.098	6.53618	0.0401675	0.0484386	0.0458784	0.0362649	0.0372721	0.0332945	0.0794611	0.0758307	0.079186	0.0448282	0.00423439	0.0356105	0.00206796	0.0781593	0.00202125
A_0046	Pantothenic acid	Pantothenic acid	6613	HMDB0000210	218.103	7.68231	0.0513483	0.0504526	0.0470538	0.0637466	0.0683987	0.0641613	0.0575546	0.0567562	0.0563384	0.0496182	0.00226559	0.0654355	0.00257449	0.056883	0.000617942
A_0023	Pelargonic acid	Pelargonic acid	8158	HMDB0000847	157.124	8.11794	N.D.	N.D.	0.00167052	0.00130629	0.00138429	N.D.	0.00141752	N.D.	N.D.	0.00167052	N.A.	0.00134529	5.51543e-05	0.00141752	N.A.
C_0070	Phe	Phe	994	HMDB0000159	166.087	10.5746	0.342153	0.37285	0.345684	0.325462	0.320165	0.304282	0.357686	0.332847	0.360921	0.353562	0.0167965	0.316636	0.011022	0.350485	0.0153597
A_0044	Phosphocreatine	Phosphocreatine	9548602	HMDB0001511	210.029	12.1171	0.123577	0.125656	0.120532	0.171379	0.185891	0.171784	0.120491	0.123016	0.118108	0.123255	0.00257754	0.176351	0.00826407	0.120538	0.0024547
C_0079	Phosphorylcholine	Phosphorylcholine	1014	HMDB0001565	184.074	19.5178	1.24916	1.34592	1.36115	0.644945	0.67704	0.65599	1.34939	1.30227	1.38749	1.31874	0.0607404	0.659325	0.0163053	1.34638	0.0426904
A_0067	Phytic acid_divalent	Phytic acid	890		328.923	16.1543	0.00577662	0.00543835	0.00434085	0.00341497	0.0039361	0.00317695	0.00584009	0.00532766	0.00466238	0.00518527	0.000750593	0.00350934	0.000388273	0.00527671	0.000590503
C_0022	Pro	Pro	614	HMDB0000162,HMDB0003411	116.071	10.3041	3.0231	3.24388	3.34357	2.94266	2.92787	2.80054	3.5406	3.36217	3.55906	3.20352	0.164001	2.89036	0.0781309	3.48728	0.108737
A_0077	PRPP	PRPP	7339	HMDB0000280	388.944	16.7132	0.0150529	0.021209	0.0189717	N.D.	N.D.	N.D.	N.D.	N.D.	N.D.	0.0184112	0.00311611	N.A.	N.A.	N.A.	N.A.
C_0005	Putrescine	Putrescine	1045	HMDB0001414	89.1076	4.53165	0.0050726	0.00622066	0.00529614	0.00415589	0.00472146	0.00441247	0.02015	0.0186919	0.0212656	0.0055298	0.000608653	0.00442994	0.000283189	0.0200358	0.00129064
C_0071	Pyridoxal	Pyridoxal	1050	HMDB0001545	168.067	8.39938	0.000973705	0.0011344	0.00117362	0.000728942	0.00112322	0.00133067	0.00112472	0.00106985	0.000988023	0.00109391	0.000105931	0.00106095	0.000305661	0.00106087	6.87901e-05
C_0097	Pyridoxamine 5'-phosphate	Pyridoxamine-P	1053	HMDB0001555	249.065	9.9867	0.00129366	0.00151018	0.00136978	0.0011104	0.00137301	0.00112892	0.00186259	0.00218105	0.00168387	0.0013912	0.000109837	0.00120411	0.000146567	0.00190917	0.000251842
C_0072	Pyridoxine	Pyridoxine	1054	HMDB0000239	170.082	8.26594	0.0117588	0.0120585	0.0123708	0.00965385	0.00984454	0.00999852	0.0125546	0.0109334	0.0121042	0.0120627	0.000306027	0.0098323	0.000172664	0.0118641	0.000836878
A_0056	Rhein	Rhein	10168		283.023	8.63091	0.00158717	0.00232402	0.00191069	N.D.	0.000650327	0.000804393	N.D.	0.000754391	N.D.	0.00194062	0.000369336	0.00072736	0.000108942	0.000754391	N.A.
A_0048	Ribose 5-phosphate	R5P	439167	HMDB0001548	229.012	10.5094	0.0064141	0.0074958	0.00688488	0.00475462	0.00623358	0.00492224	0.00727097	0.00724071	0.00783008	0.00693159	0.00054236	0.00530348	0.000809838	0.00744726	0.000331883
A_0060	Ribulose 1,5-diphosphate	Ribulose 1,5-diphosphate	123658		308.978	15.5302	N.D.	N.D.	N.D.	N.D.	N.D.	N.D.	0.000708758	N.D.	N.D.	N.A.	N.A.	N.A.	N.A.	0.000708758	N.A.
A_0047	Ribulose 5-phosphate	Ru5P	439184	HMDB0000618	229.012	10.8565	0.0132077	0.0128853	0.0120174	0.0107506	0.01195	0.0096836	0.0157035	0.017508	0.0145074	0.0127035	0.000615637	0.0107947	0.00113383	0.0159063	0.00151053
C_0116	S-Adenosylhomocysteine	SAHC	439155	HMDB0000939	385.13	8.36083	0.000710822	N.D.	0.000629668	0.00658055	0.00661527	0.00589562	0.00544987	0.0046184	0.00466524	0.000670245	5.73843e-05	0.00636381	0.000405843	0.00491117	0.000467118
C_0117	S-Adenosylmethionine	SAM	34755	HMDB0001185	399.146	6.8142	0.0349652	0.0338802	0.0330922	0.0617809	0.0569857	0.0558205	0.102801	0.0891386	0.101011	0.0339792	0.000940404	0.0581957	0.00315908	0.0976501	0.0074253
C_0115	S-Lactoylglutathione	S-Lactoylglutathione	440018	HMDB0001066	380.113	13.1148	0.00252679	0.000892698	0.00149835	0.00317985	0.00162443	0.00284462	0.00394189	0.00349067	0.00325817	0.00163928	0.000826111	0.00254963	0.000818594	0.00356358	0.000347642
C_0112	S-Methylglutathione	S-Methylglutathione	115260		322.108	12.6972	0.00068315	N.D.	N.D.	0.00146869	N.D.	0.00109349	0.00171394	0.00139891	0.00118986	0.00068315	N.A.	0.00128109	0.000265308	0.00143424	0.000263823
C_0008	Sarcosine	Sarcosine	1088	HMDB0000271	90.0555	9.03806	0.00683496	0.0075156	0.00825162	0.00662997	0.00515737	0.00580475	0.00798766	0.00787261	0.00816561	0.00753406	0.000708511	0.00586403	0.000738091	0.00800862	0.000147619
C_0083	SDMA	SDMA	169148	HMDB0003334	203.151	7.47543	N.D.	N.D.	N.D.	N.D.	N.D.	N.D.	0.000888313	N.D.	0.000567056	N.A.	N.A.	N.A.	N.A.	0.000727685	0.000227163
A_0057	Sedoheptulose 7-phosphate	S7P	165007	HMDB0001068	289.033	9.58966	N.D.	0.00430262	N.D.	N.D.	N.D.	0.00540975	0.0102741	N.D.	0.00767381	0.00430262	N.A.	0.00540975	N.A.	0.00897397	0.0018387
C_0015	Ser	Ser	617	HMDB0000187,HMDB0003406	106.051	9.52846	0.0248079	0.0236406	0.0241862	0.0453226	0.0447298	0.0458897	0.129115	0.120394	0.131767	0.0242116	0.000584026	0.045314	0.000579987	0.127092	0.00594999
C_0092	Ser-Glu	Ser-Glu	0		235.094	9.91384	0.00408852	0.00346847	0.00324394	0.00319221	0.00238849	0.00332668	0.00296403	0.00458202	0.00464409	0.00360031	0.000437453	0.00296912	0.000507323	0.00406338	0.000952572
C_0055	Spermidine	Spermidine	1102	HMDB0001257	146.166	4.35614	0.0253371	0.0261952	0.0281653	0.0223161	0.0246228	0.0228678	0.025462	0.0267761	0.025233	0.0265659	0.00145008	0.0232689	0.0012045	0.0258237	0.000832725
C_0084	Spermine	Spermine	1103	HMDB0001256	203.223	4.30547	0.0038879	0.00370135	0.00376482	0.00334665	0.00411577	0.00317113	0.0032273	0.00234144	0.00216058	0.00378469	9.48511e-05	0.00354451	0.000502446	0.00257644	0.000570868
C_0109	Streptomycin sulfate_+H2O_divalent	Streptomycin sulfate_+H2O_divalent	19649		300.645	6.61973	N.D.	0.00058043	0.000245604	N.D.	N.D.	N.D.	0.000313417	N.D.	0.000495934	0.000413017	0.000236758	N.A.	N.A.	0.000404675	0.000129059
A_0011	Succinic acid	Succinic acid	1110	HMDB0000254	117.019	20.4722	0.00876588	0.0110907	0.0100213	0.00722849	0.00932988	0.00958934	N.D.	0.00811602	0.00693107	0.0099593	0.00116365	0.00871591	0.00129465	0.00752354	0.00083789
C_0031	Taurine	Taurine	1123	HMDB0000251	126.023	20.8797	0.00913345	0.0096115	0.008667	0.0142051	0.013735	0.0135223	0.00992547	0.00934759	0.0109394	0.00913732	0.000472262	0.0138208	0.000349373	0.0100708	0.000805785
A_0025	Terephthalic acid	Terephthalic acid	7489	HMDB0002428	165.019	16.3138	0.00799753	0.00858084	0.00730651	0.00768148	0.00672346	0.00723792	0.00870377	0.00827845	0.00777309	0.00796163	0.000637924	0.00721428	0.000479451	0.00825177	0.000465915
C_0102	Thiamine	Thiamine	1130	HMDB0000235	265.113	6.33453	0.000643372	0.000670406	0.000703844	0.000744385	0.000922416	0.000848611	0.0007325	N.D.	0.000818867	0.00067254	3.02925e-05	0.000838471	8.94473e-05	0.000775684	6.10707e-05
A_0084	Thiamine diphosphate	ThPP	1132	HMDB0001372	423.03	8.00016	0.00142452	0.00159565	0.00142323	0.00134492	0.00127676	0.00143491	0.00129716	0.00127055	0.00150755	0.00148113	9.91748e-05	0.00135219	7.93263e-05	0.00135842	0.000129834
C_0044	Thiaproline	Thiaproline	9934		134.027	13.2889	0.00834999	0.0118344	0.00858294	0.00549486	0.00737606	0.00486681	0.00402069	0.00249357	0.00388866	0.00958912	0.00194798	0.00591258	0.00130574	0.00346764	0.000846147
C_0025	Thr	Thr	6288	HMDB0000167	120.066	10.0213	0.484993	0.533236	0.529874	0.460146	0.475655	0.454708	0.4994	0.470769	0.499605	0.516034	0.0269348	0.463503	0.0108694	0.489925	0.0165896
A_0018	Threonic acid	Threonic acid	5460407	HMDB0000943	135.03	9.19974	0.00533729	0.00490521	0.00476248	0.00673688	0.00689414	0.00599964	0.00537013	0.00468878	0.0044436	0.00500166	0.000299297	0.00654355	0.000477563	0.00483417	0.000480069
C_0035	trans-Glutaconic acid	trans-Glutaconic acid	5280498	HMDB0000620	131.035	21.6681	0.00191455	N.D.	N.D.	N.D.	0.00214523	0.00156785	N.D.	N.D.	N.D.	0.00191455	N.A.	0.00185654	0.000408267	N.A.	N.A.
C_0004	Trimethylamine N-oxide	Trimethylamine N-oxide	1145	HMDB0000925	76.0764	6.3269	N.D.	0.000873292	0.000891755	N.D.	0.000902825	N.D.	0.00112651	0.00124183	0.00144936	0.000882523	1.30554e-05	0.000902825	N.A.	0.00127256	0.000163603
C_0086	Trp	Trp	1148	HMDB0000929	205.099	10.4993	0.0487683	0.0526145	0.0504905	0.0487016	0.048457	0.0450627	0.0552599	0.0508338	0.0575917	0.0506244	0.00192662	0.0474071	0.00203404	0.0545618	0.00343262
C_0078	Tyr	Tyr	1153	HMDB0000158	182.082	10.8266	0.209938	0.239712	0.220562	0.203755	0.203263	0.193365	0.225365	0.20824	0.229191	0.223404	0.0150893	0.200127	0.00586178	0.220932	0.0111568
A_0081	UDP	UDP	6031	HMDB0000295	402.994	11.618	0.0121029	0.00895066	0.00959613	N.D.	0.000930257	N.D.	0.00127806	0.00168745	0.0014524	0.0102165	0.00166516	0.000930257	N.A.	0.00147264	0.000205448
A_0096	UDP-glucose UDP-galactose	UDP-Glc UDP-Gal	8629 23724458	HMDB0000286 HMDB0000302	565.048	8.62786	0.125298	0.137455	0.127431	0.0415959	0.0435002	0.0408079	0.0429859	0.0446968	0.0424045	0.130061	0.00649118	0.041968	0.00138416	0.0433624	0.00119161
A_0097	UDP-glucuronic acid	UDP-GlcA	17473	HMDB0000935	579.027	10.957	0.0784106	0.0766287	0.0740062	0.036592	0.0386799	0.0343322	0.0405081	0.0426863	0.0399391	0.0763485	0.00221551	0.0365347	0.00217445	0.0410445	0.00145
A_0100	UDP-N-acetylgalactosamine UDP-N-acetylglucosamine	UDP-N-acetylgalactosamine UDP-GlcNAc	23724461 445675	HMDB0000304 HMDB0000290	606.076	8.43804	0.0603815	0.0659041	0.0636166	0.0123466	0.0126293	0.0115101	0.0164409	0.0181794	0.0156436	0.0633007	0.00277479	0.012162	0.000581962	0.0167546	0.00129667
A_0064	UMP	UMP	6030	HMDB0000288	323.028	9.77654	0.00230317	0.00157688	0.00199786	N.D.	N.D.	N.D.	0.000821471	N.D.	N.D.	0.0019593	0.000364678	N.A.	N.A.	0.000821471	N.A.
C_0001	Urea	Urea	1176	HMDB0000294	61.04	20.026	0.125265	0.132209	0.137451	0.115147	0.109394	0.0992752	0.117727	0.121357	0.116262	0.131642	0.00611236	0.107938	0.0080351	0.118448	0.00262295
A_0028	Uric acid	Uric acid	1175	HMDB0000289	167.021	8.88633	0.000592617	0.000634505	0.000613768	N.D.	N.D.	N.D.	N.D.	0.000393438	0.000404465	0.00061363	2.09444e-05	N.A.	N.A.	0.000398952	7.79724e-06
A_0092	UTP	UTP	6133	HMDB0000285	482.961	12.5334	0.24574	0.274409	0.254893	0.00821524	0.00856349	0.00941547	0.0184239	0.0177192	0.0192691	0.258347	0.0146431	0.0087314	0.000617481	0.0184707	0.000776027
C_0023	Val	Val	1182	HMDB0000883	118.087	9.57293	0.466036	0.526876	0.519119	0.436167	0.462638	0.438934	0.504352	0.449799	0.502367	0.50401	0.0331143	0.445913	0.0145504	0.485506	0.0309394
A_0008	XA0002	XA0002	0		110.985	15.528	0.0170812	0.0147494	0.0114357	0.0067281	0.00786366	0.00592814	0.00978315	0.00909601	0.011542	0.0144221	0.00283698	0.00683997	0.000972599	0.0101404	0.0012615
A_0026	XA0012	XA0012	0		166.018	9.38202	N.D.	N.D.	N.D.	0.000700551	0.000643499	0.000723142	N.D.	N.D.	N.D.	N.A.	N.A.	0.000689064	4.10452e-05	N.A.	N.A.
A_0049	XA0033	XA0033	0		242.08	7.66247	0.36764	0.348696	0.343456	0.186764	0.182421	0.178733	0.365429	0.35327	0.345356	0.353264	0.0127225	0.182639	0.00402022	0.354685	0.0101106
A_0074	XA0055	XA0055	0		369	14.1636	0.00738061	0.00639762	0.00623731	0.0103397	0.0109156	0.00954872	0.0124997	0.0140302	0.01243	0.00667184	0.00061902	0.010268	0.000686249	0.0129866	0.000904449
C_0033	XC0016	XC0016	0		129.067	8.39566	0.0192787	0.0210984	0.0191455	0.0198544	0.0245918	0.0217713	0.0271759	0.0255393	0.0263287	0.0198409	0.00109108	0.0220725	0.00238301	0.026348	0.000818502
C_0100	XC0089	XC0089	0		255.099	9.10473	0.00102559	0.00149959	0.00116044	0.00109032	0.00120975	0.00108733	N.D.	0.0012782	0.00102455	0.00122854	0.00024423	0.00112914	6.9832e-05	0.00115137	0.000179364
C_0113	XC0132	XC0132	0		325.162	8.30548	0.0108041	0.0115292	0.0109681	0.00965385	0.00995883	0.0110273	0.0127319	0.0122843	0.0105069	0.0111005	0.000380234	0.0102133	0.000721245	0.011841	0.00117688
C_0114	XC0137	XC0137	0		350.103	12.8258	0.0106952	0.00798665	0.00938733	0.00958898	0.0103294	0.00917609	0.0115517	0.01241	0.013	0.00935639	0.00135453	0.00969817	0.000584367	0.0123205	0.000728303
C_0007	β-Ala	b-Ala	239	HMDB0000056	90.0554	7.0329	0.0946967	0.0982409	0.0944024	0.138102	0.143632	0.131737	0.0871532	0.0814313	0.0884627	0.09578	0.00213629	0.137824	0.00595282	0.0856824	0.00373929
C_0054	γ-Butyrobetaine	Actinine	134	HMDB0001161	146.119	7.75077	0.00219819	0.00237994	0.0026423	0.00303623	0.00306275	0.0029016	0.00217422	0.00252499	0.00230859	0.00240681	0.000223272	0.00300019	8.64039e-05	0.00233593	0.000176977
C_0098	γ-Glu-Cys	g-Glu-Cys	123938	HMDB0001049	251.07	12.2109	0.00312001	0.00387953	0.00349284	0.00222698	0.00232808	0.00215926	0.00177304	0.00182884	N.D.	0.00349746	0.000379784	0.00223811	8.49573e-05	0.00180094	3.94534e-05
ID consists of analysis mode and number. 'C' and 'A' showed cation and anion modes, respectively.
N.D. (Not Detected): The target peak or metabolite was below detection limits.
N.A. (Not Available): The calculation was impossible because of insufficience of the data.
† Putative metabolites which were assigned on the basis of m/z and MT in HMT standard compound library.
¶ The ratio is of computed by using averaged detection values. The latter was used as denominator.
|| The p-value is computed by Welch's t-test. (*<0.05, **<0.01, ***<0.001)
The data are sorted by Compound name in ascending order.

## Sheet: Metaboanalyst
	f.value	p.value	-LOG10(p)	FDR	Fisher's LSD
Homoserine	88885	3.84e-14	13.415	7.3e-12	SAM - Adenine; SAM - CTL
5-Aminoimidazole-4-carboxamide ribotide	15333	7.49e-12	11.126	7.11e-10	CTL - Adenine; CTL - SAM
Cystathionine	6070.5	1.21e-10	9.9189	7.63e-09	SAM - Adenine; SAM - CTL
cis-Aconitic acid	3800.4	4.91e-10	9.3092	1.73e-08	CTL - Adenine; Adenine - SAM; CTL - SAM
dCTP	4194.1	3.65e-10	9.4375	1.73e-08	CTL - Adenine; CTL - SAM
UTP	3665.7	5.47e-10	9.2622	1.73e-08	CTL - Adenine; SAM - Adenine; CTL - SAM
Hypoxanthine	3372.5	7.02e-10	9.1536	1.91e-08	Adenine - CTL; Adenine - SAM; SAM - CTL
PRPP	2488.3	1.75e-09	8.7579	4.15e-08	CTL - Adenine; CTL - SAM
XA0012	2292.4	2.23e-09	8.6512	4.71e-08	Adenine - CTL; Adenine - SAM
Ser	2188.7	2.56e-09	8.591	4.87e-08	Adenine - CTL; SAM - Adenine; SAM - CTL
CTP	2012.2	3.3e-09	8.4816	5.7e-08	CTL - Adenine; SAM - Adenine; CTL - SAM
N-Acetylneuraminic acid	1701.9	5.45e-09	8.2637	8.63e-08	Adenine - CTL; Adenine - SAM; SAM - CTL
N-Acetylputrescine	1412.7	9.52e-09	8.0215	1.39e-07	SAM - Adenine; SAM - CTL
CDP	1034.9	2.41e-08	7.6172	3.28e-07	CTL - Adenine; CTL - SAM
UDP-glucose	889.49	3.8e-08	7.4204	4.81e-07	CTL - Adenine; CTL - SAM
N6-Methyladenine	783.12	5.56e-08	7.2551	6.6e-07	SAM - Adenine; SAM - CTL
UDP-N-acetylglucosamine	748.05	6.37e-08	7.1956	7.12e-07	CTL - Adenine; SAM - Adenine; CTL - SAM
5'-Deoxy-5'-methylthioadenosine	619.25	1.12e-07	6.9505	1.18e-06	Adenine - CTL; SAM - Adenine; SAM - CTL
Ophthalmic acid	470.3	2.55e-07	6.5941	2.55e-06	SAM - Adenine; SAM - CTL
GABA	411.23	3.8e-07	6.4204	3.61e-06	Adenine - SAM; CTL - SAM
Putrescine	363.66	5.48e-07	6.2614	4.96e-06	CTL - Adenine; SAM - Adenine; SAM - CTL
XA0033	340.14	6.68e-07	6.175	5.77e-06	CTL - Adenine; SAM - Adenine
S-Adenosylmethionine	291.74	1.05e-06	5.9769	8.71e-06	Adenine - CTL; SAM - Adenine; SAM - CTL
Lys	273.81	1.27e-06	5.8952	1.01e-05	SAM - Adenine; SAM - CTL
dATP	260.49	1.48e-06	5.8309	1.12e-05	Adenine - CTL; SAM - CTL
Arg	242.85	1.82e-06	5.7406	1.33e-05	CTL - Adenine; SAM - Adenine; SAM - CTL
UDP-glucuronic acid	202.49	3.11e-06	5.507	2.19e-05	CTL - Adenine; SAM - Adenine; CTL - SAM
Citric acid	166.07	5.59e-06	5.2528	3.78e-05	CTL - Adenine; Adenine - SAM; CTL - SAM
Phosphorylcholine	164.27	5.77e-06	5.2389	3.78e-05	CTL - Adenine; SAM - Adenine
Guanosine	153.91	6.99e-06	5.1556	4.43e-05	Adenine - CTL; SAM - CTL
O-Acetylcarnitine	140.06	9.22e-06	5.0352	5.65e-05	Adenine - CTL; Adenine - SAM; CTL - SAM
N8-Acetylspermidine	137.91	9.65e-06	5.0154	5.73e-05	Adenine - CTL; SAM - Adenine; SAM - CTL
Hypotaurine	134.5	1.04e-05	4.9836	5.98e-05	Adenine - CTL; Adenine - SAM
CMP-N-acetylneuraminate	129.05	1.17e-05	4.9309	6.55e-05	CTL - Adenine; SAM - Adenine; CTL - SAM
2-Oxoglutaric acid	124.71	1.3e-05	4.8873	6.84e-05	Adenine - SAM; CTL - SAM
Ala	125.75	1.27e-05	4.8978	6.84e-05	Adenine - CTL; Adenine - SAM; CTL - SAM
ADP-glucose	118.17	1.52e-05	4.8188	7.79e-05	Adenine - CTL; SAM - CTL
2-Hydroxyglutaric acid	116.21	1.59e-05	4.7976	7.97e-05	CTL - Adenine; Adenine - SAM; CTL - SAM
Ornithine	113.56	1.71e-05	4.7683	8.31e-05	CTL - Adenine; SAM - Adenine; SAM - CTL
Adenine	100.37	2.44e-05	4.6118	0.00011612	Adenine - CTL; Adenine - SAM; SAM - CTL
Ethanolamine phosphate	80.609	4.62e-05	4.3354	0.00021408	Adenine - CTL; Adenine - SAM; SAM - CTL
Phosphocreatine	66.596	8.01e-05	4.0964	0.00036234	Adenine - CTL; Adenine - SAM
4-Methyl-2-oxovaleric acid	65.932	8.24e-05	4.0839	0.00036423	Adenine - SAM; CTL - SAM
Met	65.23	8.5e-05	4.0706	0.00036706	CTL - Adenine; SAM - Adenine; SAM - CTL
ATP	63.421	9.21e-05	4.0356	0.00038903	Adenine - CTL; SAM - Adenine; SAM - CTL
Glutathione GSH	56.303	0.00012946	3.8879	0.00052336	Adenine - CTL; Adenine - SAM; CTL - SAM
Malic acid	56.57	0.00012773	3.8937	0.00052336	Adenine - SAM; CTL - SAM
Pantothenic acid	53.113	0.00015282	3.8158	0.00060491	Adenine - CTL; Adenine - SAM; SAM - CTL
Glutamine	52.326	0.00015943	3.7974	0.00061822	Adenine - CTL; Adenine - SAM; SAM - CTL
Glycerophosphocholine	50.909	0.00017234	3.7636	0.00065488	Adenine - CTL; SAM - Adenine; SAM - CTL
Taurine	47.157	0.00021398	3.6696	0.00079718	Adenine - CTL; Adenine - SAM
XA0055	42.907	0.00027907	3.5543	0.0010197	Adenine - CTL; SAM - Adenine; SAM - CTL
Butyrylcarnitine	38.597	0.00037512	3.4258	0.0013448	Adenine - CTL; Adenine - SAM; CTL - SAM
N-Glycolylneuraminic acid	36.17	0.00044925	3.3475	0.0015807	Adenine - CTL; Adenine - SAM; SAM - CTL
ADP	34.957	0.00049371	3.3065	0.0017055	Adenine - CTL; SAM - CTL
Glatamate	34.352	0.0005181	3.2856	0.0017578	CTL - Adenine; Adenine - SAM; CTL - SAM
N-Acetylglucosamine 1-phosphate	31.03	0.00068511	3.1642	0.0022837	SAM - Adenine; SAM - CTL
Glucose 6-phosphate	28.968	0.00082644	3.0828	0.0027073	CTL - Adenine; SAM - Adenine; SAM - CTL
1-Pyrroline 5-carboxylic acid	28.78	0.00084118	3.0751	0.0027089	CTL - Adenine; SAM - Adenine; SAM - CTL
Argininosuccinic acid	27.751	0.00092855	3.0322	0.0029404	SAM - Adenine; SAM - CTL
Gly	26.838	0.0010163	2.993	0.0031656	Adenine - CTL; SAM - CTL
L-Pro	24.916	0.0012411	2.9062	0.0038032	CTL - Adenine; SAM - Adenine; SAM - CTL
Adenosine 5'-phosphosulfate	23.596	0.0014353	2.8431	0.0043286	Adenine - CTL; SAM - CTL
1-Methylnicotinamide	23.289	0.0014862	2.8279	0.004412	CTL - Adenine; SAM - Adenine; CTL - SAM
Glycerol 3-phosphate	22.864	0.0015606	2.8067	0.0045183	CTL - Adenine; SAM - Adenine
S-Adenosylhomocysteine	22.815	0.0015695	2.8042	0.0045183	Adenine - CTL; SAM - CTL
UDP	22.61	0.0016075	2.7939	0.0045585	CTL - Adenine; SAM - Adenine; CTL - SAM
6-Phosphogluconic acid	22.015	0.001725	2.7632	0.0048198	CTL - Adenine; SAM - Adenine; SAM - CTL
AMP	21.685	0.001795	2.7459	0.0048898	Adenine - CTL; SAM - CTL
Carnitine	21.655	0.0018015	2.7444	0.0048898	Adenine - SAM; CTL - SAM
Glyceraldehyde 3-phosphate	20.635	0.0020451	2.6893	0.0054727	SAM - Adenine; SAM - CTL
Glucose 1-phosphate	19.528	0.0023614	2.6268	0.006147	SAM - Adenine; SAM - CTL
NAD	19.425	0.0023941	2.6209	0.006147	CTL - Adenine; CTL - SAM
NADP	19.479	0.0023771	2.624	0.006147	CTL - Adenine; Adenine - SAM; CTL - SAM
Ribulose 5-phosphate	17.04	0.0033548	2.4743	0.0084989	SAM - Adenine; SAM - CTL
Pyridoxine	16.297	0.0037575	2.4251	0.0093937	CTL - Adenine; SAM - Adenine
Creatine	16.203	0.0038129	2.4187	0.0094085	SAM - Adenine; SAM - CTL
Gly-Asp	15.951	0.0039669	2.4016	0.0096629	CTL - Adenine; CTL - SAM
UMP	15.362	0.0043611	2.3604	0.010489	CTL - Adenine; CTL - SAM
thiazolidine-4-carboxylic acid	15.266	0.0044302	2.3536	0.010522	CTL - Adenine; Adenine - SAM; CTL - SAM
Butyrobetaine	14.031	0.0054658	2.2623	0.012821	Adenine - CTL; Adenine - SAM
Inosine	13.583	0.0059212	2.2276	0.01372	Adenine - CTL; SAM - CTL
XA0002	13.138	0.0064236	2.1922	0.014705	CTL - Adenine; SAM - Adenine
Pyridoxamine 5'-phosphate	12.93	0.0066786	2.1753	0.014965	SAM - Adenine; SAM - CTL
Threonic acid	12.917	0.006695	2.1742	0.014965	Adenine - CTL; Adenine - SAM
Uric acid	12.788	0.0068612	2.1636	0.015158	CTL - Adenine; CTL - SAM
GDP	12.663	0.0070259	2.1533	0.015344	Adenine - CTL; SAM - CTL
Betaine	12.495	0.0072577	2.1392	0.01567	CTL - Adenine; CTL - SAM
Fumaric acid	12.14	0.00778	2.109	0.016609	Adenine - SAM; CTL - SAM
2-Benzyl-3-(1H-imidazol-4-yl)-propionic acid	11.938	0.0081003	2.0915	0.017056	CTL - Adenine; SAM - Adenine
XC0016	11.896	0.0081691	2.0878	0.017056	SAM - Adenine; SAM - CTL
GMP	11.38	0.0090793	2.0419	0.018751	Adenine - CTL; SAM - CTL
N-Carbamoylaspartic acid	11.318	0.0091986	2.0363	0.018793	CTL - Adenine; CTL - SAM
2'-Deoxycytidine	11.25	0.0093302	2.0301	0.018859	CTL - Adenine; CTL - SAM
Citrulline	10.795	0.010285	1.9878	0.02057	CTL - Adenine; SAM - Adenine
Fructose 6-phosphate	10.591	0.010754	1.9684	0.021284	CTL - Adenine
Ribose 5-phosphate	10.508	0.010954	1.9604	0.021456	CTL - Adenine; SAM - Adenine
2-Aminoisobutyric acid	10.324	0.011414	1.9426	0.021686	CTL - Adenine; CTL - SAM
Phytic acid	10.329	0.011402	1.943	0.021686	CTL - Adenine; SAM - Adenine
Sarcosine	10.364	0.011313	1.9464	0.021686	CTL - Adenine; SAM - Adenine
IMP	10.191	0.011763	1.9295	0.022129	Adenine - CTL; SAM - CTL
1-Methylhistidine	9.7055	0.013164	1.8806	0.024521	CTL - Adenine; SAM - Adenine
1-Methyl-4-imidazoleacetic acid	9.4465	0.014003	1.8538	0.025831	SAM - Adenine; SAM - CTL
4-Guanidinobutyric acid	9.1551	0.015035	1.8229	0.027467	Adenine - CTL; SAM - CTL
5-Oxoproline	8.8976	0.016032	1.795	0.02901	CTL - Adenine; SAM - Adenine
(2S)-2-Azaniumyl-5-(ethylamino)-5-oxopentanoate	8.7066	0.01683	1.7739	0.030166	CTL - Adenine; SAM - Adenine
Choline	8.6478	0.017086	1.7674	0.030339	Adenine - CTL; SAM - CTL
Glutathione	8.3264	0.018582	1.7309	0.03269	CTL - Adenine; CTL - SAM
GDP-glucose	7.9498	0.020566	1.6869	0.035636	SAM - Adenine; SAM - CTL
Urea	7.9382	0.020631	1.6855	0.035636	CTL - Adenine
Creatinine	7.6047	0.02264	1.6451	0.038464	CTL - Adenine; SAM - Adenine
N-Acetylcysteine	7.5994	0.022673	1.6445	0.038464	CTL - Adenine; CTL - SAM
Isocitric acid	7.2817	0.024841	1.6048	0.041768	Adenine - SAM; CTL - SAM
XC0137	7.0458	0.026632	1.5746	0.044387	SAM - Adenine; SAM - CTL
Spermine	6.8782	0.028011	1.5527	0.046279	Adenine - SAM; CTL - SAM
