# Supplementary material for: Excess S-adenosylmethionine inhibits methylation via catabolism to adenine
Source: Commun Biol. 2022 Apr 5;5:313. doi: 10.1038/s42003-022-03280-5 (PMC8983724; doi:10.1038/s42003-022-03280-5)
Supplement: Supplementary file 7 — Supplementary Data 4 [file 42003_2022_3280_MOESM7_ESM.xlsx]

## Sheet: GOenrichment
Treatment	GO Term	Study #	Study Freq.	Pop. Freq.	Enrichment	p-value	q-value	name	gene products
SAM	GO:0030029	225	0.03	0.017	1.76471	8.12e-22	3.52e-20	actin filament-based process	Pard3,Phactr2,Phactr4,Aqp1,Eps8,Cdc42bpa,Cxadr,Cdc42bpb,Myo7a,Naa80,Nisch,Daam2,Daam1,Llgl1,Bcr,Actr2,Wipf2,Actr3,Wipf1,Mrtfa,Ezr,Tln1,Pfn1,Pfn2,Vasp,Arhgef5,Smtn,Nckap1,Limch1,Myo6,Pdgfa,Pdgfb,Myo5a,Ehbp1l1,Gmfb,Tesk2,Tesk1,F11r,Pdcd6ip,Arhgef10l,Ptk7,Parvb,Parva,Antxr1,Tnnt3,Nrp1,Rap2a,Ikbkb,Dbn1,Arf1,Rhog,Apbb1,Apbb2,Rhoa,Anln,Enah,Rhoj,Rhou,Calr,Sdad1,Rhoq,Diaph2,Cap1,Diaph3,Diaph1,Trpm7,Emp2…
Adenine	GO:0030029	205	0.031	0.017	1.82353	3.47e-20	1.41e-18	actin filament-based process	Pard3,Phactr2,Phactr4,Aqp1,Eps8,Cdc42bpb,Myo7a,Neurl2,Naa80,Nisch,Daam2,Daam1,Actb,Bcr,Actr2,Wipf2,Actr3,Myl6,Wipf1,Mrtfa,Tln1,Pfn1,Arhgef5,Abr,Smtn,Nckap1,Limch1,Pdgfa,Pdgfb,Myo5a,Ehbp1l1,Gmfb,Tesk2,Tesk1,F11r,Ehd2,Arhgef10l,Ptk7,Parva,Antxr1,Nuak2,Tnnt3,Nrp1,Rap2a,Ikbkb,Dbn1,Arf1,Rhog,Apbb2,Rhoa,Kank1,Anln,Enah,Rhoj,Rhou,Calr,Sdad1,Rhoq,Diaph2,Cap1,Diaph3,Diaph1,Flii,Emp2,Spire2,Cit,Spire1,Myom…
DZ	GO:0030029	135	0.027	0.017	1.58824	3.37e-08	7.85e-07	actin filament-based process	Rictor,Phactr2,Pafah1b1,Aqp1,Cdc42bpa,Tmod1,Eps8,Fgf7,Cavin4,Tmod3,Neurl2,Frmd6,Naa80,Nisch,Cdc42ep2,Cfl2,Klhl17,Pdpn,Flna,Flnc,Flnb,Anxa1,Pfn2,Syde1,Vasp,Arhgef7,Arhgef5,Shc1,Dstn,Tmsb10,Myh10,Abr,Epb41l2,Epb41l3,Rap1gds1,Pdgfrb,Pdgfra,Myo6,Abl1,Myo5a,Micall1,Ehbp1l1,Actg1,Coro2b,Rtkn,Gmfb,Ssh3,Cnn1,Cnn2,Cnn3,Ehd2,Fer,Arhgef10l,Auts2,Parvb,Fhdc1,Coro1b,Coro1c,Antxr1,Tnnt3,Nrp1,Nuak2,Pdlim2,Dbn1,…
Adenine	GO:0048646	347	0.052	0.034	1.52941	1.02e-20	4.33e-19	anatomical structure formation involved in morphogenesis	Col18a1,Emc10,Fkbp1a,Cd109,Eif2ak3,Hmox1,Phactr4,Twsg1,Nectin2,Elk3,Ereg,Apln,Ccbe1,Sox2,Ccdc136,Cyp1b1,Nbeal2,Neurl2,Sox9,Ccn3,Ccn1,Wls,Sox4,Wnt10b,Twist1,Rnf213,Col1a1,Rfx2,Frs2,Ndnf,Zfpm1,Mboat7,Apaf1,Supt6,Tulp3,Gata6,Gata3,Axin2,Prkca,Wdr74,Hspg2,Pfn1,Thbs1,Thbs3,Adgra2,Sdc4,Rdh10,Fn1,Sdccag8,Sec23ip,Hif1a,Nckap1,Cited2,Pdgfa,Bcl10,Scrib,Alx1,Jun,Fzd3,Egr2,Xbp1,Aimp1,Fzd5,Fzd6,Bmpr1a,Fzd8,Pt…
Adenine	GO:0006915	320	0.048	0.028	1.71429	1.89e-29	1.12e-27	apoptotic process	App,Tiam1,Sgpl1,Eva1a,Psme3,Trib3,Hmox1,Sh3glb1,Crkl,Lmbr1l,Gja1,Tm2d1,Tnfrsf11b,Sh3rf3,Myc,Cdip1,Dpf2,Ghitm,Tax1bp1,Ccn1,Nisch,Ralb,Rraga,Ddit4,Ddit3,Rnf216,Bnip2,Vdac1,Bnip1,Phlpp1,Scn2a,Lgals1,Apaf1,Dapk2,Prkcd,Fem1b,Gabarap,Prkca,Bex3,Hint1,Hint2,Rad21,Chek1,Chek2,Ddias,G2e3,Adarb1,Bcl10,Scrib,Pidd1,Fis1,Aimp2,Xbp1,Aimp1,Fzd5,Kremen1,Pea15a,Tpx2,Ppp2r1b,Tmem219,Siah2,Zfp369,Diablo,Naif1,Daxx,…
Adenine	GO:0097190	139	0.021	0.011	1.90909	7.87e-16	2.5e-14	apoptotic signaling pathway	Sgpl1,Eif2ak3,Trib3,Hmox1,Stk25,Stk24,Fnip2,Clu,Rrp8,Melk,Ero1a,Tm2d1,Tmem109,Myc,Cdip1,Cyp1b1,Htra2,Ticam1,Nbn,Pdk2,Ddit4,Ddit3,Ifi27,Casp8ap2,Scn2a,Hic1,Rnf41,Msh6,Ern1,Ppp1r13b,Msh2,Apaf1,Ifi204,Perp,Gabarap,Prkca,Topors,Senp1,Atf4,Bex3,Hint1,Chek2,Itm2b,Tgfb1,Tgfb2,Bag3,Kitl,Gskip,Sfn,Casp12,Pidd1,Bloc1s2,Xbp1,Trp53,Lamp1,Cav1,Ripk1,Igf1,Stk11,Mllt11,Dap,Snw1,Smad3,Diablo,Bcl2,Mybbp1a,Eda2r,I…
SAM	GO:0097190	148	0.02	0.011	1.81818	3.47e-15	1.01e-13	apoptotic signaling pathway	Sgpl1,Eif2ak3,Trib3,Hmox1,Stk25,Stk24,Fnip2,Clu,Rrp8,Melk,Ero1a,Pnp,Tmem109,Myc,Cdip1,Cyp1b1,Ticam1,Nbn,Pdk2,Pdk1,Uaca,Ddit4,Ddit3,Casp8ap2,Scn2a,Hic1,Rnf41,Msh6,Ern1,Ppp1r13b,Msh2,Apaf1,Ifi204,Tnfrsf10b,Pmaip1,Gabarap,Tmem117,Topors,Zdhhc3,Senp1,Atf4,Hint1,Chek2,Xpa,Itm2b,Chac1,Tgfb1,Tgfb2,Prkdc,Bag3,Kitl,Cradd,Nf1,Sfn,Mcl1,Pidd1,Xbp1,Trp53,Lamp1,Cav1,Ripk1,Igf1,Stk11,Mllt11,Dap,Smad3,Jmy,Diablo…
DZ	GO:0097190	108	0.022	0.011	2	1.58e-12	5.9e-11	apoptotic signaling pathway	Sgpl1,Trib3,Stk24,Clu,Rrp8,Melk,Ero1a,Pnp,Tmem109,Myc,Cyp1b1,Ticam1,Htra2,Shisa5,Pdk1,Ier3,Uaca,Ddit4,Ifi27,Ddit3,Casp8ap2,Tfpt,Apaf1,Ifi204,Perp,Dapk3,Pmaip1,Tnfrsf10b,Gabarap,Tmem117,Topors,Senp1,Bex3,Chek2,Xpa,Chac1,Bag6,Tgfb1,Tgfb2,Prkdc,Cradd,Sfn,Casp12,Mcl1,Selenok,Xbp1,Trp53,Lamp1,Cav1,Stk11,Mllt11,Snw1,Diablo,Bcl2,Mybbp1a,Daxx,Pawr,Itgav,Tmbim6,Ikbke,Bbc3,Tnfrsf1b,Bcl2l11,Ddx3x,Tnfrsf1a,T…
SAM	GO:0046034	71	0.0094	0.0051	1.84314	7.63e-10	1.45e-08	ATP metabolic process	Atp5g2,Atp5g1,Atp5g3,Atp5c1,Mpi,Ola1,Eno1,Eno3,Eno2,Atp7a,Khk,Gpi1,Pfkfb2,Entpd5,Ndufs1,Guk1,Parp1,Slc25a25,Foxk1,Galt,Kif5c,Ak1,Ak3,Dnajc30,Ak2,Ak5,Ak4,mt-Atp6,Tkfc,Pkm,Ampd3,Msh2,Ctns,Fxn,Tefm,Atp5b,Nmnat1,Atp5d,Enpp1,Atp5a1,Atp5pb,Aldoa,Fam20c,Dhtkd1,Gm3839,Tgfb1,Pfkl,Gale,mt-Atp8,Atp5j,Pgk1,Atp5k,Ogdh,Cox5b,Pfkm,Pfkp,Dguok,Atp5j2,Atp1b1,Bad,Atp6v1a,Eno1b,Atp6v1b2,Hk2,Hspa8,Clpx,Adpgk,Dmac2l,S…
Adenine	GO:0046034	57	0.0085	0.0051	1.66667	7.76e-06	9.07e-05	ATP metabolic process	Atp5g2,Atp5g1,Atp5c1,Ola1,Eno1,Eno2,Khk,Gpi1,Entpd5,Ndufs1,Guk1,Parp1,Pgam1,Slc25a25,Stoml2,Galt,Tpi1,Kif5c,Ak3,Ak2,Ak5,Gapdh,mt-Atp6,Tkfc,Pkm,Msh2,Ldha,Ampd2,Ctns,Fxn,Tefm,Atp5b,Atp5d,Enpp1,Atp5pb,Aldoa,Fam20c,Dhtkd1,Gm3839,Tgfb1,Gale,Pgk1,Atp5k,Ogdh,Cox5b,Pfkp,Atp5j2,Atp1b1,Bad,Atp6v1a,Eno1b,Atp6v1b2,Hk2,Hspa8,Gm10358,Surf1,Aldoart1
Adenine	GO:0006914	108	0.016	0.0085	1.88235	2.31e-14	6.75e-13	autophagy	Eva1a,Tm9sf1,Rnf185,Vps39,Sqstm1,Tex264,Tmem74,Irgm1,Plaa,Cdkn2a,Optn,Atg3,Lgals8,Vps13a,Wdr81,Tecpr1,Vti1a,Atg2a,Smcr8,Atg2b,Rnf41,Gramd1a,Ulk1,Plekhm1,Ulk2,Sirt2,Rb1cc1,Gabarap,Arsa,Vps11,Bag3,Hmgb1,Abl1,Atg10,Slc25a46,Cisd2,Pik3cb,Atg7,Atg13,Atg14,Fis1,Xbp1,Tbc1d5,Gabarapl1,Trp53,Lamp2,Gabarapl2,Tollip,Pik3c2b,Pik3c2a,Stk11,Snap29,Hspa8,Dap,Acbd5,Lix1l,Arsb,Rab7,Syt11,Tfeb,Tmbim6,Pik3c3,Phf23,…
SAM	GO:0006914	112	0.015	0.0085	1.76471	1.32e-12	3.28e-11	autophagy	Eva1a,Tm9sf1,Rnf185,Vps39,Sqstm1,Prkaa1,Tex264,Plaa,Cdkn2a,Sbf2,Optn,Atg3,Lgals8,Tecpr1,Vti1a,Smcr8,Atg2b,Rubcnl,Rnf41,Gramd1a,Becn1,Ulk1,Rab1b,Plekhm1,Ulk2,Ulk3,Atp13a2,Sirt2,Rb1cc1,Gabarap,Arsa,Vps11,Wdfy3,Vps16,Tmem208,Bag3,Hmgb1,Abl1,Tcirg1,Pik3cb,Atg7,Atg13,Atg14,Atg12,Xbp1,Tbc1d5,Gabarapl1,Trp53,Lamp2,Gabarapl2,Tollip,Pik3c2b,Stk11,Snap29,Hspa8,Dap,Lix1l,Arsb,Rab7,Atg101,Syt11,Tfeb,Tmbim6,P…
DZ	GO:0006914	76	0.015	0.0085	1.76471	4.36e-08	9.98e-07	autophagy	Atg101,Eva1a,Tmbim6,Pik3c3,Rnf185,Sqstm1,Prkaa1,Tex264,Phf23,Rab39b,Epg5,Irgm1,Cdkn2a,Optn,Wdr45,Tbc1d17,Foxo1,Atg3,Lgals8,Vps13a,Wdr81,Atg2a,Ubqln2,Gpr137,Ubqln4,Retreg1,Gramd1a,Trp53inp1,Ulk1,Ulk2,Tbc1d25,Gabarap,Pik3r4,C9orf72,Map1lc3a,Arsa,Fundc2,Anxa7,Gba,Vps16,Uvrag,Trim12a,Hmgb1,Abl1,Tcirg1,Mfn2,Pik3cb,Wipi2,Atg13,Clec16a,Wipi1,Fis1,Xbp1,Dram1,Tbc1d5,1600014C10Rik,Trp53,Vps41,Lamp2,Atg4b,P…
SAM	GO:0009058	1114	0.15	0.085	1.76471	3.21e-117	1.33e-114	biosynthetic process	Gamt,Lars2,Rpl4,Rpl5,Mecr,Rpl3,Glce,Rpl35,Rpl36,Eif2ak3,Rpl37,Rpl38,Rpl39,Rpl8,Rpl9,Rpl6,Gls,Rpl7,Mtap,Rpl30,Ddx17,Shmt2,Rpl31,Hmbs,Rpl32,Ddx11,Myc,Shmt1,Hacd2,Hacd4,Ndst1,Med1,Ndst2,Ddit3,Rpl24,Rev1,Rpl26,Rpl28,Med4,Rpl29,Ppox,Rpl21,Rpl22,Rpl23,Hdhd5,Gata6,Gata2,Jund,Mppe1,Taf9b,Sqle,Wdhd1,Gstm4,Ar,Hif1a,Itpa,Dhcr24,Pik3c2b,Cdc6,Ell2,Eprs,Abca1,Stat5a,Rpl41,Stat5b,Adi1,Eif4a2,Ephx1,Slc25a39,Eif4…
Adenine	GO:0009058	1026	0.15	0.085	1.76471	9.5e-113	4.13e-110	biosynthetic process	Gamt,Lars2,Rpl4,Rpl5,Mecr,Rpl3,Glce,Chsy1,Rpl35,Rpl36,Eif2ak3,Rpl37,Rpl38,Rpl39,Rpl8,Rpl9,Rpl6,Gls,Rpl7,Rpl30,Ddx17,Rpl31,Hmbs,Rpl32,Ddx11,Myc,Shmt1,Hacd2,Hacd4,Pgrmc1,Ddit3,Rpl24,Rpl26,Rpl28,Med4,Rpl29,Ppox,Rpl21,Rpl22,Fdx1,Rpl23,Hdhd5,Gata6,Gata3,Jund,Mppe1,Taf9b,Sqle,Wdhd1,Gstm4,Hif1a,Itpa,Abtb1,Dhcr24,Pik3c2b,Pik3c2a,Cdc6,Ell2,Eprs,Abca1,Stat5a,Rpl41,Stat5b,Adi1,Eif4a2,Ephx1,Slc25a39,Eif4a1,S…
DZ	GO:0009058	790	0.16	0.085	1.88235	2.88e-84	1.29e-81	biosynthetic process	Lars2,Rpl4,Rpl5,Rpl3,Glce,Rpl35,Eif2ak2,Rpl37,Rpl38,Rpl39,Rpl8,Rpl9,Rpl6,Rpl7,Mtap,Rpl30,Ddx17,Hmbs,Rpl31,Shmt2,Rpl32,Ddx11,Myc,Shmt1,Hacd2,Ndst2,Ddit3,Rpl24,Rpl26,Rpl28,Med4,Rpl29,Rpl21,Rpl22,Rpl23,Gata6,Mppe1,Mcat,Sqle,Wdhd1,Hif1a,Itpa,Dhcr24,Mms19,Cdc6,Abca1,Abca2,Stat5a,Rpl41,Cdk13,Eif4a2,Ephx1,Slc25a33,Fdxr,Tk1,Junb,Med13l,Pam,Parp10,Ada,Tcof1,Adk,Pawr,Smg7,Smg5,Rpl37rt,Csad,Gsto1,Rfk,Gars,G…
SAM	GO:0009056	813	0.11	0.072	1.52778	8.38e-47	7.72e-45	catabolic process	Eva1a,Eno1,Gpd1l,Eno3,Clock,Eno2,Plbd2,Vps39,Gls,Gprasp1,Shmt2,Shmt1,Wdyhv1,Agap3,Tent4b,Lgals8,Galt,Iah1,Ddit3,Parn,Tecpr1,Uba52,Trim13,Smcr8,Atg2b,Chfr,Ccdc47,Uhrf1,Upf3b,Etfdh,Ube2l6,Topors,Mex3d,Ube2l3,Vps11,Adh7,Vps16,Gstm5,Acad11,Adh5,Gstm4,Gstm1,Gstm2,Fuca1,Mettl3,Slc25a44,Ogdh,Atg13,Atg14,Itpa,Atg12,Trir,Sec61b,Pik3c2b,Eif4a3,Clpx,Ephx1,Pomt2,Abca7,Ppt1,Cubn,Psma4,Psma3,Psma6,Smg1,Pabpc1,…
Adenine	GO:0009056	729	0.11	0.072	1.52778	9.89e-41	8.48e-39	catabolic process	Cda,Eva1a,Pop1,Eno1,Hmox1,Gpd1l,Eno2,Vps39,Gls,Nub1,Tex264,Scp2,Shmt1,Wdyhv1,Entpd7,Psmb10,Optn,Atg3,Prdx3,Prdx4,Lgals8,Galt,Iah1,Acox1,Ddit3,Acox2,Hecw2,Wdr81,Parn,Tecpr1,Vti1a,Atg2a,Uba52,Acox3,Bnip2,Smcr8,Plcg2,Uggt1,Atg2b,Snd1,Gramd1a,Ccdc47,Uhrf1,Upf3b,Hoga1,Gabarap,Ube2l6,Topors,Mex3d,Ube2l3,Glud1,Vps11,Adh7,Gstm5,Acad11,Adh5,Gstm4,Fuca2,Fuca1,Lgmn,Ogdh,Atg10,Slc25a46,Atg7,Prdx6,Atg13,Atg14…
DZ	GO:0009056	537	0.11	0.072	1.52778	1.45e-25	1.15e-23	catabolic process	Cda,Eva1a,Psme4,Pop1,Eno1,Eno3,Eno2,Plbd2,Shmt2,Tex264,Shmt1,Agap3,Idnk,Psmb10,Optn,Tent4b,Atg3,Prdx2,Prdx4,Lgals8,Ddit3,Wdr81,Hecw2,Prdx1,Psmf1,Plcg1,Parn,Pdxp,Atg2a,Acox3,Uba52,Plcg2,Uggt1,Snd1,Gramd1a,Chfr,Uhrf1,Upf3b,Gabarap,Ube2l6,Topors,Mex3d,Ube2l3,Lta4h,Adh7,Vps16,Gstm5,Acad11,Gstm1,Gstm2,Fuca2,Mettl3,Slc25a44,Lgmn,Ogdh,Lnpep,Atg13,Itpa,Tbc1d5,Man1b1,Lipa,Snap29,Lipg,Gcsh,Clpx,Pcyox1l,Eph…
Adenine	GO:0007049	489	0.073	0.034	2.14706	8.49e-82	1.91e-79	cell cycle	Mdc1,Psme3,Pard3,Eif2ak4,Smc4,Smc3,Smc2,Dctn2,Dctn3,Sass6,Rab11a,Pard6a,Ralb,Ddit3,Eid1,Bin3,Uhrf1,Uhrf2,Nsun2,Prkcd,Prkce,Tubgcp2,Pard6g,Hcfc1,Rad21,Nsmce2,Ska3,Ska2,Ska1,Wdhd1,Ncaph,Plk4,Plk1,Plk2,Rad17,Cdc7,Fam83d,Cdc6,Mcmbp,Mtbp,Septin11,Cdk14,Hace1,Ino80,Snx18,Terf2,Terf1,Mei4,Cks2,Kdm8,Csnk2a2,Csnk2a1,Ing1,Phf8,Hells,Cep55,Clta,Nuf2,Cltc,Pbk,Pdcd2l,Ofd1,Cdca8,Cdca5,Nup88,Cdca3,Rack1,Cdca2,C…
SAM	GO:0007049	488	0.065	0.034	1.91176	3.58e-63	5.13e-61	cell cycle	Mdc1,Psme3,Pard3,Eif2ak4,Smc4,Smc3,Smc2,Dctn2,Dctn3,Sass6,Tent4b,Rab11a,Pard6a,Ralb,Ddit3,Chfr,Eid1,Bin3,Uhrf1,Nsun2,Prkcd,Prkce,Tubgcp2,Jtb,Pard6g,Hcfc1,Rad21,Nsmce2,Ska3,Ska2,Ska1,Wdhd1,Ncaph,Plk4,Plk1,Rad17,Cdc7,Fam83d,Cdc6,Mcmbp,Mtbp,Septin11,Cdk14,Mcts1,Ino80,Snx18,Terf2,Terf1,Mei4,Cks2,Csnk2a2,Csnk2a1,Ing1,Phf8,Hells,Cep55,Nuf2,Cltc,Pbk,Pdcd2l,Cdca8,Cdca5,Cdca3,Rack1,Cdca2,Cit,Lin54,Anapc11…
DZ	GO:0007049	295	0.059	0.034	1.73529	1.22e-23	8.71e-22	cell cycle	Eif2ak4,Smc5,Pafah1b1,Smc4,Smc2,Timeless,Dctn2,Zw10,Dctn3,Rcc1,Cdc23,Thap1,Tent4b,Ralb,Marf1,Ddit3,Txnip,Chfr,Uhrf1,Nsun2,Prkcd,Prkce,Sik1,Cdc34,Chek1,Chek2,Ska3,Wdhd1,Rabgap1,Dynlt3,Ccny,Ddias,Mapk1ip1,Chtf18,Mtus1,Knstrn,Cdt1,Plk4,Plk1,Plk2,Cdc7,Rad17,Cdc6,Stag2,Mtbp,Tpx2,Nup214,Septin11,Siah2,Foxn3,Ccar1,Banp,Csnk2a2,Pik3c3,Tsg101,Fanci,Setdb2,Pbk,Foxo4,Pdcd2l,Spout1,Septin7,Septin6,Septin5,Cd…
SAM	GO:0022402	529	0.07	0.034	2.05882	4.76e-93	1.2e-90	cell cycle process	Atf2,Actr1a,Actr1b,Eif2ak4,Cep192,Smc4,Smc3,Phb2,Smc2,Eps8,Dctn6,Gja1,Ddx11,Dctn2,Myc,Dctn3,Sass6,Rab11a,Pard6a,Ddit3,Rpl24,Hus1,Rpl26,Bnip2,Eml1,Prr11,Chfr,Bin3,Ehmt2,Nsun2,Tubgcp2,Jtb,Pard6g,Ube2l3,Rad51c,Rad51d,Rad21,Stmn1,Psmg2,Xpc,Prkdc,Cep72,Wdr62,Rrs1,Ncapg,Ncaph,Tcf7l2,Plk4,Cpeb1,Plk1,Rad17,Cdc7,Fam83d,Cdc6,Trappc12,Anp32b,Aaas,Mcmbp,Cdk17,Cdk16,Mtbp,Tdrkh,Septin11,Cdk14,Ino80,Rttn,Daxx,E…
Adenine	GO:0022402	497	0.074	0.034	2.17647	1.58e-92	4.87e-90	cell cycle process	Eif2ak4,Cep192,Smc4,Smc3,Phb2,Smc2,Eps8,Dctn6,Gja1,Ddx11,Dctn2,Myc,Dctn3,Sass6,Rab11a,Pard6a,Ddit3,Rpl24,Hus1,Rpl26,Bnip2,Eml1,Prr11,Bin3,Ranbp1,Nsun2,Tubgcp2,Pard6g,Ube2l3,Rad51c,Rad21,Stmn1,Psmg2,Xpc,Cep72,Wdr62,Rrs1,Ncapg,Ncaph,Tcf7l2,Plk4,Cpeb1,Plk1,Plk2,Rad17,Cdc7,Fam83d,Cdc6,Trappc12,Sptbn1,Aaas,Cdk18,Mcmbp,Cdk16,Mtbp,Tdrkh,Naa50,Septin11,Cdk14,Ago4,Ino80,Rttn,Daxx,Ezh2,Snx18,Rfwd3,Arf1,Ter…
DZ	GO:0022402	292	0.058	0.034	1.70588	1.24e-24	9.36e-23	cell cycle process	Actr1b,Eif2ak4,Smc5,Pafah1b1,Smc4,Phb2,Smc2,Akap8l,Eps8,Timeless,Ddx11,Dctn2,Zw10,Myc,Dctn3,Rcc1,Cdc23,Wnt10b,Sox4,Ier3,Marf1,Ccni,Ddit3,Rpl24,Rpl26,Chfr,Ranbp1,Nsun2,Thbs1,Ube2l3,Pola1,Chek1,Chek2,Unc119,Sdccag8,Xpc,Calm1,Dynlt1b,Prkdc,Ccny,Ddias,Cradd,Rrs1,Chtf18,Knstrn,Cdt1,Plk4,Cpeb1,Plk1,Plk2,Cdc7,Rad17,Zfp365,Cdc6,Stag2,Cdk18,Cdk16,Mtbp,Tpx2,Rtel1,Naa50,Septin11,Stard9,Daxx,Ezh2,Kif18a,Arf1…
SAM	GO:0008219	392	0.052	0.031	1.67742	1.31e-33	8.23e-32	cell death	Eva1a,Psme3,Wdr92,Hmox1,Prkd2,Lmbr1l,Gja1,Tnfrsf11b,Sh3rf3,Myc,Cdip1,Rmdn3,Ghitm,Nisch,Ralb,Ddit4,Ddit3,Bnip2,Lgals1,Dapk2,Prkcd,Tnfrsf10b,Jtb,Gabarap,Ncstn,Rad21,Mfsd10,Prkdc,Kitl,Bcl10,Scrib,Fzd5,Pea15a,Fgfr2,Naif1,Gatad2a,Daxx,Xkr5,Stk17b,Csnk2a2,Pawr,Csnk2a1,Cryab,Gli3,Bbc3,Shf,Tnfrsf1a,Slc25a27,Sgms1,Rfk,Nfkb1,Spata2,Jak2,Mecom,Cdca7,Emp1,Ppard,Emp3,Aen,Emp2,Rack1,Cyld,Ciapin1,Cit,Tnfrsf9,Ga…
DZ	GO:0008219	282	0.056	0.031	1.80645	1.82e-26	1.55e-24	cell death	App,Sgpl1,Eva1a,Wdr92,Trib3,Sh3glb1,Tnfrsf11b,Sh3rf3,Myc,Akt2,Rmdn3,Tax1bp1,Nisch,Slc4a7,Ralb,Ddit4,Ddit3,Sh3rf1,Tfpt,Apaf1,Dapk2,Prkcd,Dapk3,Tnfrsf10b,Hip1r,Axin2,Gabarap,Sik1,Ifit2,Bex3,Chek1,Chek2,Chac1,Prkdc,Ddias,Cradd,Tcirg1,Bcl10,Fis1,Tial1,Aimp2,Xbp1,Aimp1,Kremen1,Pea15a,Fgfr2,Tpx2,Ppp2r1b,Kdelr1,Siah2,Diablo,Gatad2a,Daxx,Ccar1,Nuak2,Mydgf,Stk17b,Pgam5,Sra1,Csnk2a2,Pawr,Ikbkg,Apbb1,Susd6,…
Adenine	GO:0051301	286	0.043	0.018	2.38889	5.28e-61	8.32e-59	cell division	Nedd1,Pard3,Smc4,Smc3,Smc2,Timeless,Zw10,Dctn3,Cdc27,Rcc1,Cdc26,Cdc23,Cdc20,Pard6a,Ccnk,Ralb,Spast,Ccnf,Knl1,Actr2,Tipin,Actr3,Bin3,Nsun2,Dixdc1,Prkce,Pard6g,Rad21,Fubp1,Arhgef2,Hnrnpu,Chek2,Nsmce2,Ska3,Ska2,Ska1,Dsn1,Ccny,Snx9,Triobp,Map4,Ncaph,Knstrn,Cdt1,Plk1,Rcc2,Cdc7,Fam83d,Cdc6,Stag2,Stag1,Fgfr1,Mcmbp,Tpx2,Ext1,Septin11,Cdk14,Mis18bp1,Cdc16,Ino80,Pelo,Snx18,Kif18b,Terf1,Cks2,Pik3c3,Dync1h1,…
SAM	GO:0051301	294	0.039	0.018	2.16667	6.92e-55	7.9e-53	cell division	Nedd1,Pard3,Smc4,Smc3,Smc2,Ppp2r2d,Timeless,Zw10,Dctn3,Cdc27,Rcc1,Cdc26,Cdc23,Tent4b,Cdc20,Pard6a,Ccnk,Ralb,Ccnf,Knl1,Actr2,Chfr,Tipin,Actr3,Becn1,Bin3,Nsun2,Dixdc1,Prkce,Jtb,Pard6g,Rad21,Fubp1,Arhgef2,Hnrnpu,Chek2,Nsmce2,Ska3,Ska2,Ska1,Dsn1,Ccny,Map9,Snx9,Triobp,Map4,Ncaph,Knstrn,Cdt1,Plk1,Rcc2,Fzd7,Cdc7,Fam83d,Cdc6,Stag2,Fgfr1,Mcmbp,Fgfr2,Ankle2,Pdcd6ip,Tpx2,Ext1,Septin11,Cdk14,Mis18bp1,Cdc16,I…
DZ	GO:0051301	155	0.031	0.018	1.72222	1.03e-12	3.89e-11	cell division	Ube2s,Reep4,Reep3,Smc5,Pafah1b1,Smc4,Smc2,Ctdp1,Timeless,Zw10,Dctn3,Rcc1,Nek1,Cdkn2a,Cdc23,Tent4b,Mad2l2,Ralb,Kmt5a,Lig3,Mad2l1,Chfr,Sgo1,Nsun2,Mau2,Dixdc1,Nusap1,Prkce,Bub1b,Ruvbl1,Fubp1,Chek2,Anapc5,Anapc4,Lzts2,Ska3,Pmf1,Dync1li1,Epb41l2,Mapre1,Tgfb2,Dynlt3,Ccny,Mapre3,Numa1,Klhl21,Evi5,Pik3cb,Knstrn,Tial1,Cdt1,Nek9,Akna,Ccnd3,Plk1,Bod1,Ccnd1,Nek6,Cdc7,Cdc6,Arl8b,Stag2,Arl8a,Fgfr1,Fgfr2,Tpx2,S…
SAM	GO:0016049	59	0.0078	0.0048	1.625	6.39e-06	7.1e-05	cell growth	App,Tiam1,Nrp1,Flrt1,Bdnf,Flrt3,Slit2,Eif2ak4,Hsp90aa1,Sec61a1,Iqgap1,Sox9,Hdac6,Impact,Emp1,Plxna3,Emp3,Ndel1,Hsp90ab1,Plxna1,Gsk3b,Zeb2,Itgb1,Bin3,Smo,Ulk1,Postn,Ulk2,Sema5a,Sorbs2,Raph1,Llph,Vcl,Aurka,Ddr1,C9orf72,Nrn1,Fubp1,Arih2,Camk2d,Tgfb1,Tgfb2,Tgfb3,Lamb2,Epb41l5,Abl1,Ndn,Rarg,Wasf1,Map1b,Spg11,Stk11,Prkg1,Map2k4,Nin,Cobl,Sema3f,Tgfbr2,Dclk1
SAM	GO:0008283	266	0.035	0.023	1.52174	3.66e-17	1.22e-15	cell population proliferation	Mki67,Igf2bp1,Fkbp1a,Ereg,Lmbr1l,Gja1,Tbk1,Ints1,Myc,Sox9,Ccn3,Psmb10,Pdk1,Sox4,Wnt10b,Twist1,Prdx2,Med1,Alkbh3,Ift88,Prdx1,Frs2,Eml1,Rpl29,Dixdc1,Prkcd,Ift80,Kalrn,Atf5,Ube2l3,Ncstn,Fubp1,Chek1,Cited2,Larp7,Tcirg1,Pdgfb,Scrib,Ctc1,Egr1,Xbp1,Btbd10,Ogfod1,Fzd6,Col8a1,Lipa,Dchs1,Col8a2,Fam83d,Igf1,Fgfr2,Lipg,L3mbtl2,Ext1,Ctps,Rhbdf1,Fat4,Junb,Pelo,Glul,Ddr2,Dbn1,Stat6,Cks2,Il18,Nelfb,Gli3,Hells,Lr…
DZ	GO:0008283	181	0.036	0.023	1.56522	2.89e-11	9.75e-10	cell population proliferation	Cd74,Riox2,Bmper,Pafah1b1,Ctnnb1,Clu,Bysl,Foxc2,Fgf7,Melk,Tbk1,Myc,Sox9,Ccn2,Psmb10,Azi2,Thap1,Pdk1,Malt1,Wnt10b,Sox4,Prdx2,Osr1,Prdx1,Rps6,Otud6b,Rpl29,Mrps27,Washc1,Purb,Scarb1,Dixdc1,Prkcd,Pdpn,Axin2,Ift80,Csf1,Btrc,Atf5,Ube2l3,Rnf43,Cxcl12,Fubp1,Npr3,Ppp1r8,Chek1,Myh10,Arid2,Tgfb1,Tgfb2,Ripk2,Ptch1,Dph1,Pdgfrb,Cited2,Larp7,Hmgb1,Abl1,Tcirg1,Morf4l1,Pik3cb,Egr1,Ift20,Bbs1,Fzd3,Xbp1,Ccnd3,Btbd1…
SAM	GO:0031589	79	0.011	0.0064	1.71875	1.04e-07	1.52e-06	cell-substrate adhesion	Tiam1,Nrp1,Efna1,Col16a1,Eda,Srgap2,Peak1,Fndc3b,Ilk,Tyro3,Itgav,Rhoa,Itgbl1,Bcl2l11,Kif14,Angpt1,Angpt4,Col3a1,Col5a3,Akip1,Dag1,Adam9,Ppard,Prkx,Trpm7,Emp2,Adam8,Itgb7,Vamp3,Rpl29,Fermt2,Lama5,Itga2b,Itgb1,Itgb5,Itgb2,Itgb3,Gas6,Cd34,Ddr1,Sorbs3,Src,Fn1,Itga5,Itga6,Nid2,Nid1,Ephb3,Sned1,Lamb2,Micall2,Epb41l5,Adamts12,Abl1,Lamb1,Mertk,Jam3,Itga10,Cd63,Itga11,Fzd4,Fzd7,Emilin1,Radil,Msln,Tmem8b,M…
SAM	GO:0007044	25	0.0033	0.0016	2.0625	7.75e-06	8.51e-05	cell-substrate junction assembly	Peak1,Src,Fn1,Itga5,Thy1,Itgav,Rhod,Ajuba,Pdpk1,Ptprk,Tns1,Coro2b,Dst,Taok2,Rcc2,Tesk2,Ptk2b,Fermt2,Bcr,Dlc1,Itgb3,Bcl2,Lamc1,Tln1,Pip5k1a
SAM	GO:0071840	2462	0.33	0.21	1.57143	8.36e-200	1.08e-196	cellular component organization or biogenesis	Erbb2,Actr1a,Wdr90,Actr1b,Fam50a,Ccdc66,Phactr2,Luc7l,Smc6,Vps35,Phactr4,Smc4,Smc3,Phb2,Smc2,Vps39,Rrp8,Eps8,Gja1,Myc,Sass6,Agap3,Naa80,Wdr82,Hus1,Trim16,Abcc4,Ccdc47,Ehmt2,Nsun4,Mrtfa,Ehmt1,Wdr75,Wdr74,Hspg2,Wdr77,Psmg2,Vps11,Nsmce2,Psmg4,Flot2,Wdr5b,Flot1,Vps16,Gjc1,Sqle,Wdhd1,Wdr62,Rrs1,Ncapg,Bbip1,Cldn1,Zranb1,Ncaph,Zranb3,Itpa,Tcf7l2,Bloc1s1,Plk4,Phc1,Plk1,Dhcr24,Bloc1s5,Bloc1s6,Col8a1,Col8a…
Adenine	GO:0071840	2216	0.33	0.21	1.57143	2.46e-176	3.45e-173	cellular component organization or biogenesis	Erbb2,Wdr90,Fam50a,Phactr2,Smc6,Luc7l,Vps35,Phactr4,Smc4,Smc3,Phb2,Smc2,Vps39,Rrp8,Eps8,Gja1,Myc,Sass6,Naa80,Rpgrip1l,Pgrmc1,Wdr82,Wdr81,Hus1,Abcc4,Abcc1,Ccdc47,Nsun4,Mrtfa,Wdr73,Wdr75,Wdr74,Hspg2,Psmg2,Vps11,Nsmce2,Psmg4,Flot2,Wdr5b,Flot1,Abr,Gjc1,Sqle,Wdhd1,Wdr62,Rrs1,Ncapg,Cldn1,Ncaph,Zranb3,Itpa,Tcf7l2,Bloc1s1,Bloc1s2,Plk4,Bloc1s3,Phc1,Plk1,Dhcr24,Plk2,Bloc1s6,Col8a1,Col8a2,Asf1b,F11r,Abca1,P…
DZ	GO:0071840	1603	0.32	0.21	1.52381	3.71e-99	2.55e-96	cellular component organization or biogenesis	Psme4,Actr1b,Fam50a,Ccdc66,Smc6,Phactr2,Smc5,Smc4,Phb2,Smc2,Rrp8,Eps8,Myc,Agap3,Mief1,Naa80,Rpgrip1l,Crnkl1,Wdr81,Otud6b,Trim16,Nsun4,Wdr73,Wdr75,Psmg3,Flot1,Vps16,Abr,Sqle,Wdhd1,Gar1,Rrs1,Bbip1,Cldn1,Itpa,Bloc1s1,Plk4,Plk1,Dhcr24,Plk2,Bloc1s6,Col8a1,Mms19,Asf1b,Abca1,Ehd1,Cdk16,Pomt1,Abca2,Naa50,Ehd2,Gjb2,Ehd4,Abca5,Mcts2,Cdk10,Abca7,Antxr1,Ikbkb,Btg2,Phf1,Ikbkg,Adm,Smg7,Smg5,Kank1,Abraxas1,Nyap…
SAM	GO:0051641	1056	0.14	0.081	1.7284	1.65e-109	5.3e-107	cellular localization	Myl12a,Wdr91,Actr1a,Actr1b,Vps35,Cep192,Fam98a,Phb2,Stxbp6,Vps39,Gle1,Stxbp1,Ipo11,Gprasp1,Stxbp2,Gja1,Tfg,Hyou1,Agap3,Med1,Mex3b,Ift88,Ddit3,Tecpr2,Vps25,Fam126b,Fam126a,Itsn1,Ranbp3,Bin3,Bin1,Itsn2,Zdhhc7,Ift80,Topors,Zdhhc3,Zdhhc4,Ranbp6,Zdhhc1,Rab22a,Zdhhc2,Rad21,Xpa,Mppe1,Vps11,Flot2,Flot1,Vps16,Hif1a,Cep72,Ttc30a1,Rrs1,Bbip1,Atg13,Atg14,Tcf7l2,Bloc1s1,Rhot1,Rhot2,Plk1,Bloc1s5,Bloc1s6,Sec61b…
Adenine	GO:0051641	947	0.14	0.081	1.7284	7.18e-94	2.26e-91	cellular localization	Vps35,Cep192,Vps36,Fam98a,Phb2,Stxbp6,Vps39,Gle1,Stxbp1,Stxbp2,Gja1,Stxbp4,Hyou1,Mex3b,Ift81,Ddit3,Wdr81,Tecpr2,Fam126a,Itsn1,Ranbp3,Bin3,Ranbp1,Bin1,Zdhhc7,Axin2,Zdhhc6,Topors,Ranbp6,Zdhhc1,Rab22a,Zdhhc2,Rad21,Mppe1,Vps11,Flot2,Flot1,Hif1a,Cep72,Ttc30a1,Rrs1,Atg13,Atg14,Tcf7l2,Bloc1s1,Bloc1s2,Rhot1,Bloc1s3,Rhot2,Plk1,Bloc1s6,Sec61b,Dchs1,F11r,Sptbn1,Abca1,Ehd1,Mtbp,Ehd2,Cep83,Ikbkb,Dzip1,Ttc21b,…
DZ	GO:0051641	688	0.14	0.081	1.7284	4.43e-55	9.94e-53	cellular localization	Lman1,Cacng7,Actr1b,Vps36,Fam98a,Phb2,Stxbp6,Stxbp2,Stxbp4,Anp32a,Hyou1,Dctn2,Akt2,Agap3,Optn,Wls,Mex3b,Ddit3,Txnip,Wdr81,Tecpr2,Fam126a,Itsn1,Ranbp1,Arhgap1,Zdhhc7,Axin2,Ift80,Zdhhc6,S100a10,Topors,Zdhhc1,Ranbp6,Rab22a,Adprh,Gipc1,Mppe1,Xpa,Thy1,Flot1,Vps16,Hif1a,Myo6,Rrs1,Bbip1,Atg13,Tbc1d1,Bloc1s1,Fyb2,Rhot2,Plk1,Sec61g,Jup,Tbc1d5,Tbc1d4,Bloc1s6,Pmm1,Fam83h,Exoc3l4,Phax,Trappc11,Terf2ip,Nfkbia…
Adenine	GO:0044237	3030	0.45	0.27	1.66667	2.08E-312	2.63e-308	cellular metabolic process	Gamt,Phf5a,Erbb2,Rrp1,Smc6,Vps35,Smc4,Fam98a,Smc3,Fam98b,Rrp9,Smc2,Dus3l,Vps39,Rrp8,Hmbs,Myc,Hacd2,Naa80,Hacd4,Galt,Pgrmc1,Naxe,Wdr82,Wdr81,Bpnt2,Hus1,Pusl1,Ppox,Fam126a,Ccdc47,Nsun2,Otud7b,Nsun4,Hdhd5,Zdhhc7,Nsun6,Zdhhc8,Wdr75,Zdhhc5,Wdr74,Zdhhc6,Pip4k2b,Mex3d,Pip4k2c,Zdhhc1,Hdhd2,Pip4k2a,Zdhhc2,Nsmce1,Vps11,Nsmce2,Wdr5b,Adh7,Adh5,Taf9b,Sqle,Wdhd1,Mettl2,Rrs1,Zranb2,Zranb3,Itpa,Tcf7l2,Abtb1,Bloc…
SAM	GO:0044237	3385	0.45	0.27	1.66667	1E-323	1e-300	cellular metabolic process	Gamt,Phf5a,Erbb2,Smc6,Vps35,Smc4,Smc3,Rrp9,Smc2,Dus3l,Vps39,Rrp8,Mtap,Hmbs,Agap3,Tent4b,Galt,Wdr82,Hus1,Pusl1,Ccdc47,Ehmt2,Hdhd5,Ehmt1,Wdr75,Wdr74,Pip4k2b,Mex3d,Pip4k2c,Hdhd2,Pip4k2a,Vps11,Wdr5b,Vps16,Wdhd1,Mettl2,Mettl3,Mettl1,Rrs1,Zranb1,Zranb2,Zranb3,Bloc1s1,Plk4,Plk1,Sec61b,Ell2,Abca1,Tdrkh,Stat5a,Stat5b,mt-Co2,Abca7,Wdr55,Acadsb,Psma4,Psma3,Btg2,Psma6,Btg1,Smg1,Slc27a1,Tcof1,Psma2,Psma1,Rrp1…
DZ	GO:0044237	2286	0.46	0.27	1.7037	2.13e-218	2.48e-214	cellular metabolic process	Phf5a,Psme4,Rrp1,Smc6,Smc5,Smc4,Fam98a,Smc2,Rrp9,Rrp8,Paxip1,Mtap,Hmbs,Myc,Agap3,Hacd2,Naa80,Tent4b,Crnkl1,Naxe,Wdr81,Psmf1,Otud6b,Trim16,Fam126a,Prkcsh,Nsun3,Nsun2,Otud7b,Nsun4,Zdhhc7,Raly,Wdr75,Zdhhc5,Zdhhc6,Pip4k2c,Mex3d,Zdhhc1,Icmt,Nsmce1,Nsmce3,Mcat,Adh7,Vps16,Sqle,Wdhd1,Mettl2,Mettl3,Mettl1,Gar1,Rrs1,Zranb2,Itpa,Bloc1s1,Plk4,Lactb2,Plk1,Plk2,Pdcd11,Bmpr1a,Mms19,Cdk18,Abca1,Cdk16,Pomt1,Abca2…
SAM	GO:0031668	117	0.016	0.009	1.77778	3.57e-12	8.47e-11	cellular response to extracellular stimulus	Mapk8,Eif2ak3,Eif2ak4,Stk24,Sh3glb1,Rrp8,Pdia3,Prkaa1,Pdk4,Cdkn2b,Cd68,Pdk2,Szt2,Ralb,Rraga,Rragc,Gas2l1,Tle5,Becn1,Ehmt2,Ulk1,Postn,Cib2,Gabarap,Atf4,Xpr1,Atf3,Sesn2,Sesn1,Sesn3,Itga6,Rnase4,Bmf,Atg7,Itfg2,Atg14,Gcn1,Prkag1,Prkag2,Tcf7l2,Fosl1,Jun,Xbp1,Gabarapl1,Tfrc,Trp53,Lamp2,Gabarapl2,Nprl2,Pik3c2b,Cpeb4,Ssh1,Wdr59,Dap,Tbl2,Fes,Hspa5,Bcl2,Mybbp1a,Inhbb,Glul,Hnrnpl,Rptor,Atp5g1,Mios,Asns,Tfeb…
Adenine	GO:0031668	102	0.015	0.009	1.66667	1.6e-09	3.11e-08	cellular response to extracellular stimulus	Eif2ak3,Eif2ak4,Stk24,Angptl4,Sh3glb1,Mapk3,Rrp8,Pdia3,Comt,Pdk4,Cdkn2b,Cd68,Pdk2,Szt2,Ralb,Rraga,Rragc,Tsc1,Gas2l1,Ulk1,Postn,Gabarap,Atf4,Xpr1,Atf3,Sesn2,Sesn1,Sesn3,Itga6,Rnase4,Bmf,Atg7,Atg14,Prkag1,Tcf7l2,Fosl1,Jun,Xbp1,Gabarapl1,Tfrc,Trp53,Lamp2,Gabarapl2,Pik3c2b,Pik3c2a,Cpeb4,Ssh1,Dap,Tbl2,Fes,Hspa5,Bcl2,Mybbp1a,Inhbb,Hnrnpl,Nuak2,Atp5g1,Asns,Tfeb,Depdc5,Pik3c3,Amigo1,Kptn,Foxo3,Wdr45,Foxo…
SAM	GO:0033554	875	0.12	0.06	2	3.85e-124	1.71e-121	cellular response to stress	Eif2ak3,Eif2ak4,Smc6,Smc4,Clock,Smc3,Smc2,Rrp8,Paxip1,Hyou1,Ddx11,Myc,Cdip1,Agap3,Clpb,Endov,Ralb,Ddit4,Ddit3,Pnkp,Rev1,Hus1,Rpl26,Trim13,Atrip,Ccdc47,Uhrf1,Ehmt2,Gata6,Topors,Wdr76,Jund,Rad21,Nsmce1,Nsmce3,Xpa,Nsmce2,Xpc,Flot1,Wdhd1,Hif1a,Mettl3,Cited2,Morf4l2,Atg13,Atg14,Zranb3,Tcf7l2,Plk1,Parp16,Sec61b,Nprl2,Pik3c2b,Rad17,Crebrf,Cdc7,Rad18,Pea15a,Terf2ip,Wdr59,Mcts1,Pomt2,Rel,Ino80,Junb,Btg2,S…
Adenine	GO:0033554	785	0.12	0.06	2	1.36e-105	4.9e-103	cellular response to stress	Eif2ak3,Eif2ak4,Smc6,Smc4,Smc3,Smc2,Rrp8,Stxbp4,Hyou1,Ddx11,Myc,Cdip1,Clpb,Endov,Ralb,Ddit4,Ddit3,Hus1,Rpl26,Ccdc47,Uhrf1,Gata6,Topors,Wdr76,Jund,Rad21,Nsmce1,Nsmce2,Xpc,Flot1,Wdhd1,Hif1a,Cited2,Atg10,Morf4l2,Atg13,Atg14,Zranb3,Tcf7l2,Plk1,Parp16,Sec61b,Pik3c2b,Pik3c2a,Rad17,Crebrf,Cdc7,Rad18,Pea15a,Rel,Ino80,Junb,Parp10,Btg2,Smg1,Stat6,Phf1,Ogg1,Ikbkg,Adm,Cryab,Wdr48,Edem1,Macrod2,Macrod1,Nfkb2,…
DZ	GO:0033554	556	0.11	0.06	1.83333	2.72e-56	6.34e-54	cellular response to stress	Psme4,Eif2ak2,Smc6,Eif2ak4,Smc5,Smc4,Smc2,Rrp8,Paxip1,Stxbp4,Hyou1,Ddx11,Myc,Agap3,Ier5,Endov,Optn,Ier3,Prdx2,Prdx4,Uaca,Ralb,Ddit4,Ddit3,Pnkp,Prdx1,Rpl26,Atrip,Uggt1,Oser1,Tfpt,Uhrf1,Prkcd,Prkce,Gata6,Gabarap,Topors,Atf3,Rad51b,Nsmce1,Nsmce3,Xpa,Xpc,Flot1,Adnp2,Kdm6b,Bard1,Dhfr,Wdhd1,Hif1a,Errfi1,Prkdc,Mettl3,Cited2,Myo6,Sfn,Morf4l2,Morf4l1,Atg13,Jun,Cpeb1,Plk1,Parp16,Man1b1,Cdc7,Rad17,Mms19,Rbp…
SAM	GO:0007059	90	0.012	0.0052	2.30769	8.5e-21	3.52e-19	chromosome segregation	Kif18a,Kif18b,Smc4,Birc5,Smc2,Spc25,Nup37,Ddx3x,Ube2i,Ctcf,Zw10,Nuf2,Tlk2,Rcc1,Tlk1,Oip5,Tubg2,Nek2,Tubg1,Espl1,Cdca8,Incenp,Nup43,Knl1,Cdca2,Mad2l1,Ndel1,Wrap73,Cit,Sgo1,Ncaph2,Mau2,Nusap1,Top2a,Hjurp,Esco2,Rad21,Ppp1r7,Ttk,Kif2c,Ska3,Pmf1,Ska2,Ska1,Nsl1,Seh1l,Dsn1,Ncapg2,Top3b,Numa1,Rps3,Bub3,Klhl22,Bub1,Ncaph,Knstrn,Nek8,Cdt1,Mis18a,Msto1,Plk1,Ercc2,Cenpc1,Nde1,Nek6,Pttg1,Sgo2a,Phf13,Ciao2a,St…
Adenine	GO:0007059	84	0.013	0.0052	2.5	6.86e-20	2.76e-18	chromosome segregation	Kif18a,Lats1,Kif18b,Smc4,Birc5,Smc2,Spc25,Nup37,Ddx3x,Ube2i,Ctcf,Zw10,Nuf2,Tlk2,Rcc1,Tlk1,Oip5,Tubg2,Nek2,Tubg1,Espl1,Cdca8,Incenp,Nup43,Knl1,Cdca2,Mad2l1,Cit,Sgo1,Ncaph2,Nusap1,Top2a,Hjurp,Esco2,Ntmt1,Rad21,Ttk,Kif2c,Ska3,Pmf1,Ska2,Ska1,Nsl1,Dsn1,Ncapg2,Numa1,Rps3,Bub3,Klhl22,Bub1,Ncaph,Knstrn,Nek8,Cdt1,Mis18a,Msto1,Plk1,Cenpc1,Nde1,Nek6,Sgo2a,Phf13,Stag2,Mlh1,Arl8b,Cenpw,Stag1,Arl8a,Cenpt,Srpk1…
SAM	GO:0007623	71	0.0094	0.0057	1.64912	3.47e-07	4.69e-06	circadian rhythm	Bdnf,Naglu,Nampt,Cry1,Cry2,Ahr,Clock,Hdac3,Rbm4,Mycbp2,Hdac2,Dbp,Cavin3,Timeless,Hdac1,Cyp7b1,Ppp1ca,Creb1,Gpr176,Nr1d2,Nr1d1,Mttp,Usp2,Ngf,Relb,Kdm5a,Gsk3b,Maged1,Noct,Klf10,Arntl2,Atf5,Csnk1e,Atf4,Ncor1,Mat2a,Hnrnpu,Nono,Ep300,Ndufa9,Setx,Ncoa2,Mta1,Mettl3,Gfpt1,Srrd,Id1,Crem,Id3,Btbd9,Ppp1cc,Egr1,Ahcy,Nfil3,Trp53,Rorc,Rora,Pten,Igf1,Pml,Per1,Per3,Bhlhe41,Hnrnpd,Mybbp1a,Lgr4,Huwe1,Ciart,Ddx5,Og…
Adenine	GO:0007623	63	0.0094	0.0057	1.64912	3.92e-06	4.81e-05	circadian rhythm	Thrap3,Bdnf,Nampt,Kdm8,Cry1,Cry2,Ahr,Bhlhe40,Hdac3,Rbm4,Mycbp2,Hdac2,Dbp,Cavin3,Timeless,Hdac1,Six3,Cyp7b1,Ppp1ca,Gpr176,Nr1d2,Nr1d1,Usp2,Ngf,Relb,Gsk3b,Maged1,Noct,Klf10,Arntl,Atf5,Csnk1e,Atf4,Ncor1,Mat2a,Hnrnpu,Nono,Ndufa9,Setx,Mta1,Gfpt1,Srrd,Id1,Id3,Btbd9,Ppp1cc,Ppp1cb,Egr1,Trp53,Prkg2,Pten,Igf1,Pml,Ass1,Per2,Zfhx3,Hnrnpd,Mybbp1a,Lgr4,Ciart,Ddx5,Ogt,Srebf1
SAM	GO:0048589	192	0.026	0.016	1.625	5.54e-14	1.5e-12	developmental growth	App,Tiam1,Eif2ak4,Gja1,Zfp950,Ints1,Sox9,Ccn3,Tns2,Wnt10b,Gigyf2,Tnks2,Alkbh1,Rpl29,Bin3,Ehmt2,Ulk1,Ulk2,Raph1,Atf5,Nrn1,Rad51b,Icmt,Fubp1,Rdh10,Xpa,Rtf1,Ar,Adarb1,Tcf7l2,Ctc1,Igf1,Fgfr2,Prkg1,Ext1,Ptk7,Ctr9,Atm,Dclk1,Nrp1,Ddr2,Ecm1,Hoxd13,En1,Adm,Fmn1,Gli3,Hbegf,Wdr48,Rara,Slc25a25,Foxo3,Fbln5,Selenom,Selenon,H3f3b,Rmi1,H3f3a,Fkbp8,Plekha1,Rspo2,Zfx,Ndel1,Zeb2,Gas2,Tmtc3,Gas1,Ddr1,Smpd3,Stk40,Ep…
Adenine	GO:0048589	172	0.026	0.016	1.625	3.25e-12	8.1e-11	developmental growth	App,Tiam1,Chst11,Kif26b,Tnc,Atn1,Ahr,Eif2ak4,Ctnnb1,Gja1,Zfp950,Ints1,Nek1,Sox9,Ccn3,Nbn,Tns2,Pygo2,Wnt10b,Tnks2,Ppp1r13l,Alkbh1,Kdm1a,Rpl29,Hsp90ab1,Plxna1,Bin3,Ulk1,Postn,Ulk2,Gpd2,Sorbs2,Gata3,Raph1,Csf1,Pcnt,Atf5,Ube3a,Vcl,Nrn1,Rad51b,Stil,Fubp1,Rdh10,Rtf1,Large1,Pkdcc,Tgfb1,Naca,Pdgfrb,Epb41l5,Pdgfra,Dvl1,Gnas,Abl1,Ndn,Adarb1,Palb2,Tcf7l2,Ctc1,Trp53,Bmpr1a,Dhcr7,Igf1,Wdtc1,Stk11,Bmp4,Kmt2d,E…
DZ	GO:0048589	123	0.024	0.016	1.5	4e-07	8.07e-06	developmental growth	App,Chst11,Tnc,Ahr,Eif2ak4,Ctnnb1,Hsp90aa1,Zfp950,Nek1,Sox9,Tns2,Wnt10b,Tnks2,Plxna3,Rpl29,Hsp90ab1,Ulk1,Postn,Ulk2,Sorbs2,Sik3,Csf1,Atf5,Ube3a,Hoxa11,Nrn1,Icmt,Rad51b,Fubp1,Rdh10,Xpa,Large1,Lzts2,Tgfb1,Naca,Pdgfrb,Tbce,Pdgfra,Dvl1,Abl1,Trp53,Bmpr1a,Dhcr7,Kpna1,Stk11,Fgfr2,Bmp4,Auts2,Plau,Bcl2,Ctr9,Ly6e,Dclk1,Nrp1,Ecm1,Nrp2,Hoxd13,Flrt3,Adm,Gli2,Taf10,Rara,Arid5b,Slc25a25,Hdac6,Foxo3,Fbln5,Impact…
Adenine	GO:0006984	21	0.0031	0.0011	2.81818	3.96e-08	6.57e-07	ER-nucleus signaling pathway	Ddit3,Trp53,Atp2a2,Selenos,Tmed2,Eif2ak3,Eif2a,Srebf2,Bcl2l11,Gsk3b,Insig1,Arhgef10l,Insig2,Ccdc47,Hspa5,Scap,Atg10,Erlin1,Bid,Atf4,Srebf1
SAM	GO:0006984	20	0.0027	0.0011	2.45455	2.71e-06	3.2e-05	ER-nucleus signaling pathway	Ddit3,Trp53,Atp2a2,Selenos,Tmed2,Eif2ak3,Eif2a,Nfe2l2,Srebf2,Ppp1r15b,Bcl2l11,Gsk3b,Insig1,Arhgef10l,Ccdc47,Hspa5,Erlin1,Bid,Atf4,Srebf1
SAM	GO:0007163	87	0.012	0.0068	1.76471	4.71e-09	8.1e-08	establishment or maintenance of cell polarity	Cyth3,Pdlim1,Slc9a3r1,Kif26b,Wdr1,Pard3,Rictor,Rhog,Clasp2,BC034090,Atn1,Ilk,Fscn1,Stk25,Aqp1,Rhoa,Cyth1,Hsp90aa1,Crkl,Gja1,Hey1,Rhoj,Rhou,Frmd4a,Rhoq,Synj2bp,Cap1,Pard6a,Cfl1,Amotl2,Exoc4,Amotl1,Llgl1,Hsp90ab1,Gsk3b,Lmna,Actr2,Actr3,Fez1,Myh9,Pard6g,Ckap5,Ezr,Arf6,Fbf1,Ophn1,Kif2c,Cep290,Pak1,Map2,Nckap1,Wnt7b,Sipa1l3,Hes1,Tcirg1,Myo9b,Scrib,Lin7c,Pard3b,Jam3,Myo9a,Cdc42,Ift20,Arhgap35,Rab10,Eya…
Adenine	GO:0007163	78	0.012	0.0068	1.76471	5.77e-08	9.44e-07	establishment or maintenance of cell polarity	Arf4,Cyth3,Pdlim1,Kif26b,Pard3,Rictor,Rhog,Clasp2,Atn1,Ilk,Fscn1,Stk25,Aqp1,Rhoa,Crkl,Gja1,Hey1,Rhoj,Rhou,Frmd4a,Rhoq,Rpgrip1l,Cap1,Pard6a,Cfl1,Amotl2,Amotl1,Ctnna1,Amot,Hsp90ab1,Actb,Gsk3b,Lmna,Actr2,Actr3,Mtcl1,Fam89b,Fez1,Pard6g,Ckap5,Crk,Arf6,Fbf1,Ophn1,Sdccag8,Kif2c,Cep290,Map2,Nckap1,Sipa1l3,Hes1,Myo9b,Scrib,Pard3b,Jam3,Ift20,Rab10,Pdzd11,Eya1,Gbf1,Coro7,Stk11,Lims1,Mapkap1,Sh3bp1,Dlg1,Ttc8…
SAM	GO:0040007	200	0.027	0.017	1.58824	5.72e-14	1.54e-12	growth	App,Tiam1,Eif2ak4,Ereg,Gja1,Zfp950,Ints1,Sox9,Ccn3,Tns2,Wnt10b,Gigyf2,Tnks2,Alkbh1,Rpl29,Bin3,Ehmt2,Ulk1,Ulk2,Raph1,Atf5,Nrn1,Rad51b,Icmt,Fubp1,Rdh10,Xpa,Rtf1,Ar,Adarb1,Tcf7l2,Ctc1,Igf1,Fgfr2,Prkg1,Ext1,Ptk7,Ctr9,Atm,Dclk1,Nrp1,Ddr2,Ecm1,Hoxd13,En1,Adm,Fmn1,Gli3,Hbegf,Wdr48,Rara,Slc25a25,Foxo3,Fbln5,Selenom,Selenon,H3f3b,Rmi1,H3f3a,Emp1,Fkbp8,Plekha1,Emp3,Rspo2,Zfx,Ndel1,Zeb2,Gas2,Tmtc3,Gas1,Ddr1…
Adenine	GO:0040007	179	0.027	0.017	1.58824	3.69e-12	9.08e-11	growth	App,Tiam1,Chst11,Kif26b,Tnc,Atn1,Ahr,Eif2ak4,Ctnnb1,Ereg,Gja1,Zfp950,Ints1,Nek1,Sox9,Ccn3,Nbn,Tns2,Pygo2,Wnt10b,Tnks2,Ppp1r13l,Alkbh1,Kdm1a,Rpl29,Hsp90ab1,Plxna1,Bin3,Ulk1,Postn,Ulk2,Gpd2,Sorbs2,Gata3,Raph1,Csf1,Pcnt,Atf5,Ube3a,Vcl,Nrn1,Rad51b,Stil,Fubp1,Rdh10,Rtf1,Large1,Pkdcc,Tgfb1,Tgfb2,Tgfb3,Naca,Pdgfrb,Epb41l5,Pdgfra,Dvl1,Gnas,Abl1,Ndn,Adarb1,Palb2,Tcf7l2,Ctc1,Trp53,Bmpr1a,Dhcr7,Igf1,Wdtc1,S…
SAM	GO:0030522	48	0.0064	0.0035	1.82857	4.55e-07	6.06e-06	intracellular receptor signaling pathway	Ywhah,Safb,Rhoa,Lsm14a,Crkl,Rbfox2,Ddx17,Fam120b,Rara,Pim1,Pdk3,Jak2,Arid1a,Pias2,Med1,Rnf135,Nr1h2,Alpk1,Fkbp4,Pparg,Rela,Rxrb,Rxra,Ptges3,Actn4,Ube3a,Wbp2,Src,Dnaja1,Nod2,Zmiz1,Ar,Ripk2,Mavs,Ubr5,Trip4,Inava,Rarg,Otulin,Rora,Kdm3a,Nfkbia,Pml,Calcoco1,Klf9,Stat3,Daxx,Ddx5
Adenine	GO:0030522	42	0.0063	0.0035	1.8	9.25e-06	0.000107	intracellular receptor signaling pathway	Yap1,Wbp2,Src,Carm1,Nod2,Zmiz1,Ywhah,Rhoa,Lsm14a,Crkl,Ddx17,Fam120b,Ripk2,Ddx58,Rara,Ubr5,Pim1,Irgm2,Pdk3,Trip4,Jak2,Inava,Ifih1,Nr1h2,Otulin,Fkbp4,Pparg,Rela,Nfkbia,Pml,Rxrb,Rxra,Snw1,Ptges3,Calcoco1,Tifa,Klf9,Stat3,Actn4,Ube3a,Daxx,Ddx5
Adenine	GO:0035556	587	0.087	0.058	1.5	2.35e-32	1.53e-30	intracellular signal transduction	Prkd3,Erbb2,Eif2ak3,Hmox1,Phactr4,Pask,Rrp8,Eps8,Akt3,Myc,Cdip1,Neurl2,Rab11a,Nisch,Ralb,Ddit4,Ddit3,Wsb2,Araf,Rpl26,Plcg2,Bcr,Itsn1,Prkcg,Dapk2,Prkcd,Prkce,Gata3,Prkca,Topors,Atf4,Rab22a,Nsmce1,Flot1,Abr,Setx,Errfi1,Pdgfb,Sfn,Rsu1,Bcl10,Jun,Plk1,Dhcr24,Plk2,Pik3c2b,Pik3c2a,Dchs1,Stk38l,Pea15a,Nfkbia,Abca1,Nlrx1,Rel,Fat4,Ss18,Plcb4,Brap,Ikbkb,Plcb3,Stk17b,Depdc5,Braf,Adm,Gmip,Cryab,Tead4,Bbc3,Tnf…
SAM	GO:0001889	45	0.006	0.0034	1.76471	4.62e-06	5.25e-05	liver development	Mpst,Icmt,Man2a1,Ahr,Hmox1,Pkd2,Gfer,Jarid2,Zmpste24,Sp1,Taf10,Hlx,Sp3,Cited2,Nf1,Hes1,Atg7,Igf2r,Foxm1,Runx1,Med1,Jun,Tgfbr3,Xbp1,Ift88,Pik3ca,Ccnd1,Acadm,Rela,Aacs,Sec63,Smad3,Stat5b,Pkm,Notch1,Cobl,Notch2,Gata6,Rb1cc1,Met,Arf6,Aurka,Ezh2,Sulf2,Ezh1
SAM	GO:0033036	1031	0.14	0.08	1.75	3.6e-100	1.01e-97	macromolecule localization	Myl12a,Igf2bp1,Vps35,Cep192,Rab3il1,Phb2,Stxbp6,Vps39,Gle1,Stxbp1,Ipo11,Stxbp2,Gja1,Agap1,Agap3,Med1,Mex3b,Ift88,Ddit3,Tecpr2,Vps25,Fam126b,Fam126a,Itsn1,Ranbp3,Bin3,Zdhhc7,Ift80,Topors,Hspg2,Zdhhc3,Zdhhc4,Ranbp6,Zdhhc1,Rab22a,Zdhhc2,Icmt,Rad21,Xpa,Vps11,Flot2,Flot1,Vps16,Cep72,Ttc30a1,Rrs1,Bbip1,Atg13,Eif4enif1,Btf3,Plk1,Dhcr24,Bloc1s6,Sec61b,Dchs1,F11r,Terf2ip,Abca1,Ehd1,Mtbp,Ehd4,Cep83,Abca7,P…
Adenine	GO:0033036	935	0.14	0.08	1.75	1.91e-90	5.36e-88	macromolecule localization	Vps35,Cep192,Vps36,Rab3il1,Stxbp5,Phb2,Stxbp6,Vps39,Gle1,Stxbp1,Stxbp2,Gja1,Stxbp4,Agap1,Mex3b,Ift81,Ddit3,Tecpr2,Fam126a,Itsn1,Ranbp3,Bin3,Zdhhc7,Gata3,Axin2,Zdhhc6,Topors,Hspg2,Ranbp6,Zdhhc1,Rab22a,Zdhhc2,Rad21,Vps11,Flot2,Flot1,Cep72,Ttc30a1,Rrs1,Atg10,Atg13,Eif4enif1,Btf3,Bloc1s3,Plk1,Dhcr24,Bloc1s6,Sec61b,Dchs1,F11r,Sptbn1,Abca1,Ehd1,Mtbp,Ehd2,Cep83,Ppt1,Parp11,Ikbkb,Dzip1,Ttc21b,Sft2d2,Braf…
DZ	GO:0033036	675	0.13	0.08	1.625	1.46e-51	3.04e-49	macromolecule localization	Lman1,Cacng7,Unc50,Vps36,Stxbp5,Phb2,Stxbp6,Stxbp2,Stxbp4,Dctn2,Akt2,Agap3,Optn,Wls,Atg3,Mex3b,Ddit3,Txnip,Plcg1,Tecpr2,Fam126a,Itsn1,Arhgap1,Zdhhc7,Axin2,Gabarap,Ift80,Zdhhc6,S100a10,Topors,Zdhhc1,Ranbp6,Rab22a,Adprh,Icmt,Gipc1,Xpa,Thy1,Flot1,Vps16,Myo6,Rrs1,Bbip1,Atg13,Eif4enif1,Btf3,Tbc1d1,Fyb2,Plk1,Sec61g,Jup,Tbc1d5,Dhcr24,Tfrc,Tbc1d4,Bloc1s6,Pmm1,Fam83h,Exoc3l4,Phax,Rbpj,Terf2ip,Nfkbia,Snap2…
SAM	GO:0098727	72	0.0096	0.006	1.6	2.44e-06	2.9e-05	maintenance of cell number	Ss18,Cdc73,Med24,Mapk8,Igf2bp1,Braf,Kdm4c,Smc3,Dis3l2,Sox2,Pcm1,Cdh2,Jmjd1c,Sox9,Cdkn2a,Foxo3,Arid1a,Sox4,Foxo1,Cul4a,Selenon,Zhx2,Mecom,Srrt,Med6,Gnl3,Mtf2,Klf10,Med15,Raf1,Gata2,Rtf1,Zfp36l2,Dll1,Aspm,Rest,Fut10,Mettl3,Prrx1,Setd1a,Wdr62,Hes1,Tcf7l1,Eif4enif1,Leo1,Tcf7l2,Fancd2,Trim8,Mettl14,Med30,Fzd7,Lif,Nkap,Prdm16,Igf1,Rbpj,Stag2,Klf4,Fgfr1,Phf19,Tbx3,Bcl9,Stat3,Ctr9,Dicer1,Paf1,Hmga2,Hook3…
Adenine	GO:0098727	66	0.0098	0.006	1.63333	3.75e-06	4.62e-05	maintenance of cell number	Ss18,Med24,Ldb1,Vps72,Rif1,Braf,Ctnnb1,Kdm4c,Smc3,Dis3l2,Sox2,Pcm1,Cdh2,Sox9,Cdkn2a,Fancc,Foxo3,Sox4,Foxo1,Cul4a,Med12,Zhx2,Med14,Mecom,Srrt,Eif4e,Med7,Gnl3,Mtf2,Klf10,Raf1,Yap1,Rtf1,Zfp36l2,Dll1,Aspm,Rest,Setd6,Fut10,Prrx1,Wdr62,Hes1,Tcf7l1,Eif4enif1,Tcf7l2,Fancd2,Trim8,Lif,Bmpr1a,Prdm16,Igf1,Stag2,Klf4,Fgfr1,Phf19,Tbx3,Bcl9,Stat3,Ctr9,Dicer1,Paf1,Hmga2,Smc1a,Pelo,Tpt1,Ezh2
SAM	GO:0022406	48	0.0064	0.0034	1.88235	2.72e-07	3.76e-06	membrane docking	Rab7,Pacs2,Stxbp1,Stxbp2,Ctbp2,Mospd3,Gramd2,Exoc6b,Nsf,Chp1,Stx8,Stx7,Vps33a,Exoc4,Exoc6,Pdzd8,Vamp2,Unc13c,Stx12,Stx16,Psen2,Stx11,Syde1,Uso1,Vps11,Vapb,Stx6,Stx3,Stx2,Atg14,Rab10,Rab13,Rab12,Cav2,Bloc1s6,Vps45,Esyt1,Stx5a,Esyt2,Rab8b,Rab8a,Cln3,Snap29,Stx1a,Rab3a,Rab3b,Cep83,Pex16
SAM	GO:0008152	3717	0.49	0.32	1.53125	<1E-323	1e-300	metabolic process	Gamt,Phf5a,Erbb2,Smc6,Vps35,Smc4,Smc3,Rrp9,Smc2,Dus3l,Vps39,Rrp8,Mtap,Hmbs,Agap3,Tent4b,Galt,Wdr82,Hus1,Pusl1,Chid1,Ccdc47,Ehmt2,Hdhd5,Ehmt1,Wdr75,Wdr74,Pip4k2b,Mex3d,Pip4k2c,Hdhd2,Pip4k2a,Vps11,Wdr5b,Vps16,Wdhd1,Mettl2,Mettl3,Mettl1,Rrs1,Zranb1,Zranb2,Zranb3,Bloc1s1,Plk4,Plk1,Sec61b,Ell2,Abca1,Tdrkh,Stat5a,Stat5b,Rel,mt-Co2,Abca7,Wdr55,Acadsb,Psma4,Psma3,Btg2,Psma6,Btg1,Smg1,Slc27a1,Tcof1,Psma2,…
Adenine	GO:0008152	3326	0.5	0.32	1.5625	4.49e-298	2.83e-294	metabolic process	Gamt,Phf5a,Erbb2,Rrp1,Smc6,Vps35,Smc4,Smc3,Rrp9,Smc2,Dus3l,Vps39,Rrp8,Hmbs,Galt,Wdr82,Wdr81,Bpnt2,Hus1,Pusl1,Ccdc47,Otud7b,Hdhd5,Wdr75,Wdr74,Pip4k2b,Mex3d,Pip4k2c,Hdhd2,Pip4k2a,Vps11,Wdr5b,Wdhd1,Mettl2,Rrs1,Zranb2,Zranb3,Abtb1,Bloc1s1,Plk4,Plk1,Plk2,Bmpr1a,Sec61b,Ell2,Abca1,Tdrkh,Stat5a,Stat5b,Rel,mt-Co3,Wdr55,Acadsb,Btg2,Btg1,Smg1,Slc27a1,Tcof1,Psma2,Rrp12,Adk,Adm,Smg9,Smg7,Smg5,Wdr48,Rpl37rt,Rf…
DZ	GO:0008152	2510	0.5	0.32	1.5625	2.03e-210	1.19e-206	metabolic process	Phf5a,Psme4,Rrp1,Smc6,Smc5,Smc4,Fam98a,Smc2,Rrp9,Rrp8,Paxip1,Mtap,Hmbs,Myc,Agap3,Hacd2,Naa80,Tent4b,Crnkl1,Naxe,Wdr81,Psmf1,Otud6b,Trim16,Fam126a,Chid1,Prkcsh,Nsun3,Nsun2,Otud7b,Nsun4,Zdhhc7,Raly,Wdr75,Zdhhc5,Zdhhc6,Pip4k2c,Mex3d,Zdhhc1,Icmt,Nsmce1,Nsmce3,Mcat,Adh7,Vps16,Sqle,Wdhd1,Cybc1,Mettl2,Mettl3,Mettl1,Gar1,Rrs1,Zranb2,Itpa,Bloc1s1,Plk4,Lactb2,Plk1,Dhcr24,Plk2,Pdcd11,Bmpr1a,Mms19,Cdk18,Abca…
SAM	GO:0032259	138	0.018	0.012	1.5	9.45e-10	1.77e-08	methylation	Gamt,Ndufaf7,Suv39h1,Antkmt,Rbm15b,Suv39h2,Smyd2,Smyd3,Smyd4,Fam98a,Fam98b,Rrp8,Fbl,Mtap,H1f2,Ftsj3,Men1,Tyms,Trmt2a,Trmt2b,Rnmt,Wdr82,Tyw3,Kmt5a,Kdm1b,Kmt5b,Lcmt1,Nsun3,Ehmt2,Nsun2,Atf7ip,Nsun4,Nsun6,Ehmt1,Sirt7,Virma,Icmt,Tfb2m,Mettl25,Mettl22,Nop2,Cmtr2,Rtf1,Dimt1,Cmtr1,Wdr5b,Coq5,N6amt1,Mettl2,Pcif1,Mettl3,Setd1a,Mettl1,Mettl21a,Gnas,Pemt,Thada,Zfp57,Mtrr,Trmt112,Comtd1,Tpmt,Mettl14,Baz2a,Trm…
DZ	GO:0032259	102	0.02	0.012	1.66667	3.93e-09	1.05e-07	methylation	Ndufaf7,Ndufaf5,Antkmt,Suv39h2,Smyd2,Fam98a,Rrp8,Fbl,Mtap,Comt,Smyd5,H1f2,Cxxc1,Tyms,Trmt2b,Lcmt2,Kmt5a,Kdm1b,Bend3,Kmt5b,Trmt1l,Ilf3,Nsun3,Nsun2,Nsun4,Atf7ip,Sirt7,Gspt1,Icmt,Tfb2m,Ntmt1,Mettl25,Nop2,Dimt1,Cmtr1,Emg1,Mettl2,Mettl3,Mettl1,Mettl21a,Dph5,Thada,Zfp57,Mtrr,Baz2a,Mettl14,Trmt61a,Mettl17,Mettl16,Etfbkmt,Kmt2e,Trmt10a,Trmt12,Trmt10c,Prdm15,Ctr9,Ogt,Gtpbp3,Ezh2,Ezh1,Btg2,Btg1,Atpsckmt,Wd…
Adenine	GO:0032259	124	0.018	0.012	1.5	1.04e-08	1.87e-07	methylation	Gamt,Ndufaf7,Suv39h1,Antkmt,Rbm15b,Suv39h2,Smyd3,Smyd4,Fam98a,Fam98b,Pwp1,Rrp8,Hsd17b10,Fbl,Comt,H1f2,Ftsj1,Ftsj3,Men1,Tyms,Trmt2a,Rnmt,Wdr82,Kmt5a,Kmt5b,Lcmt1,Nsun2,Atf7ip,Nsun4,Nsun6,Sirt7,Virma,Coprs,Ntmt1,Mettl25,Mettl22,Nop2,Rtf1,Dimt1,Cmtr1,Wdr5b,Snrpb,Coq5,Emg1,Mettl2,Mettl21a,Gnas,Pemt,Zfp57,Trmt112,Comtd1,Tpmt,Baz2a,Mettl18,Prdm16,Mettl15,Mettl16,Etfbkmt,Kmt2d,Tdrkh,Dnmt1,Kmt2e,Prdm11,Tr…
SAM	GO:0061842	26	0.0035	0.0014	2.5	3.39e-08	5.29e-07	microtubule organizing center localization	Pard3,Dync1li2,Aspm,Tbccd1,Fhod1,Nubp1,Pard3b,Syne1,Tmem201,Ift20,Sun2,Akap9,Nde1,Kif5b,Mad2l1,Plxna2,Ndel1,Ccdc141,Ints13,Dlg1,Gpsm2,Nin,Cep83,Arpc5,Ezr,Aurka
Adenine	GO:0061842	22	0.0033	0.0014	2.35714	5.03e-06	6.08e-05	microtubule organizing center localization	Ift20,Sun2,Pard3,Akap9,Nde1,Kif5b,Mad2l1,Plxna2,Ccdc141,Aspm,Ints13,Tbccd1,Fhod1,Dlg1,Gpsm2,Cep83,Arpc5,Nubp1,Pard3b,Syne1,Aurka,Tmem201
SAM	GO:0007017	367	0.049	0.028	1.75	1.67e-36	1.14e-34	microtubule-based process	App,Nedd1,Actr1a,Pard3,Actr1b,Ccdc66,Cep192,Pclaf,Dynlrb1,Uxt,Cdc42bpa,Dctn6,Gja1,Dctn2,Zw10,Dctn3,Sass6,Rcc1,Dnaaf5,Rab11a,Cdc20,Pard6a,Ift88,Espl1,Dag1,Bnip2,Ap1g1,Eml1,Llgl1,Wrap73,Eml2,Ccdc120,Actr2,Eml4,Tbcel,Actr3,Xrn2,Tubgcp2,Gabarap,Ift80,Pard6g,Ezr,Arhgef2,Hnrnpu,Stmn1,Chek2,Calm3,Flot2,Calm2,Calm1,Dynlt1b,Hif1a,Ift140,Map2,Cep72,Hspb11,Wdr62,Ttc30a1,Map9,Myo5a,Nckap5l,Map4,Map6,Tmem201,…
Adenine	GO:0007017	334	0.05	0.028	1.78571	1.85e-33	1.26e-31	microtubule-based process	App,Nedd1,Pard3,Cep192,Pclaf,Dctn6,Gja1,Dctn2,Zw10,Dctn3,Sass6,Rcc1,Dnaaf5,Rab11a,Cdc20,Pard6a,Spast,Ift81,Espl1,Dag1,Rfx3,Bnip2,Eml1,Eml2,Ccdc120,Actr2,Eml4,Tbcel,Actr3,Ranbp1,Ppp2r3c,Xrn2,Wdr73,Tubgcp2,Gabarap,Pard6g,Arhgef2,Hnrnpu,Stmn1,Chek2,Calm3,Flot2,Sdccag8,Calm2,Calm1,Hif1a,Ift140,Map2,Cep72,Hspb11,Wdr62,Ttc30a1,Myo5a,Nckap5l,Map4,Map6,Tmem201,Knstrn,Bloc1s1,Bloc1s2,Rhot1,Plk4,Bloc1s3,Rh…
Adenine	GO:0051851	37	0.0055	0.0025	2.2	6.83e-08	1.11e-06	modulation by host of symbiont process	Rab9,Pcx,Psmc3,Fmr1,Eif2ak4,Aqp1,Inpp5k,Rest,Ctdp1,Vapa,Nucks1,Ythdc2,Sp1,Vapb,Hdac1,Smarcb1,Ccl5,Zfp72,Zc3h12a,Igf2r,Zfp639,Ppib,Jun,Ccnk,Cav2,Napepld,Cfl1,Fbxl2,Sugt1,Tardbp,Hspa8,Snw1,Tbc1d20,Stom,Ptx3,Apoe,Anxa2
SAM	GO:0051851	39	0.0052	0.0025	2.08	1.12e-07	1.63e-06	modulation by host of symbiont process	Rab9,Pcx,Psmc3,Fmr1,Ep300,Eif2ak4,Aqp1,Inpp5k,Rest,Ctdp1,Vapa,Nucks1,Taf11,Ythdc2,Sp1,Vapb,Hdac1,Ccl5,Zfp72,Tfap4,Zc3h12a,Igf2r,Zfp639,Ppib,Jun,Ccnk,Cav2,Napepld,Cfl1,Fbxl2,Sugt1,Tardbp,Hspa8,Gtf2b,Tbc1d20,Stom,Ptx3,Apoe,Anxa2
Adenine	GO:0051817	55	0.0082	0.0035	2.34286	3.08e-13	8.31e-12	modulation of process of other organism involved in symbiotic interaction	Rab9,Fmr1,Eif2ak4,Aqp1,Bcl2l11,Ctdp1,Ythdc2,Hdac1,Smarcb1,Myc,Serpinb9,Irgm1,Irgm2,Zfp639,Ppib,Ccnk,Rraga,Dag1,Cfl1,Bcl2l1,Gapdh,Mmp9,Rxra,Ulk1,Ulk2,Tbc1d20,Stom,Anxa2,Tlr2,Tnip1,Pcx,Insr,Psmc3,Inpp5k,Rest,Vapa,Nucks1,Sp1,Vapb,Ccl5,Zfp72,Atg7,Zc3h12a,Igf2r,Jun,Bad,Cav2,Napepld,Fbxl2,Sugt1,Tardbp,Hspa8,Snw1,Ptx3,Apoe
SAM	GO:0051817	55	0.0073	0.0035	2.08571	4.68e-11	1.02e-09	modulation of process of other organism involved in symbiotic interaction	Rab9,Fmr1,Eif2ak4,Aqp1,Bcl2l11,Ctdp1,Taf11,Ythdc2,Hdac1,Myc,Serpinb9,Zfp639,Ppib,Ccnk,Rraga,Dag1,Cfl1,Bcl2l1,Mmp9,Rxra,Ulk1,Ulk2,Gtf2b,Tbc1d20,Stom,Hyal2,Anxa2,Tlr2,Tnip1,Pcx,Insr,Psmc3,Ep300,Inpp5k,Rest,Vapa,Nucks1,Sp1,Vapb,Ccl5,Zfp72,Tfap4,Atg7,Zc3h12a,Igf2r,Jun,Bad,Cav2,Napepld,Fbxl2,Sugt1,Tardbp,Hspa8,Ptx3,Apoe
DZ	GO:0051817	35	0.007	0.0035	2	8.76e-06	0.000136	modulation of process of other organism involved in symbiotic interaction	Tnip1,Pcx,Fmr1,Eif2ak4,Aqp1,Bcl2l11,Ctdp1,Vapa,Nucks1,Taf11,Sp1,Myc,Ccl5,Serpinb9,Rrp1b,Irgm1,Irgm2,Igf2r,Ppib,Jun,Dag1,Cfl1,Bcl2l1,Sugt1,Tardbp,Hspa8,Snw1,Ulk1,Ulk2,Stom,Ptx3,Smarca4,Apoe,Anxa2,Tlr2
SAM	GO:0006807	3031	0.4	0.25	1.6	6.21e-300	1.6e-296	nitrogen compound metabolic process	Gamt,Lactb,Phf5a,Erbb2,Smc6,Vps35,Smc4,Fam98a,Smc3,Fam98b,Rrp9,Smc2,Dus3l,Rrp8,Paxip1,Mtap,Hmbs,Myc,Agap3,Hacd2,Hacd4,Naa80,Tent4b,Galt,Wdr82,Rev1,Hus1,Trim16,Trim13,Pusl1,Ppox,Ccdc47,Nsun3,Ehmt2,Nsun2,Nsun4,Zdhhc7,Zdhhc8,Nsun6,Ehmt1,Wdr75,Wdr74,Zdhhc3,Mex3d,Zdhhc4,Zdhhc1,Zdhhc2,Icmt,Nsmce1,Nsmce3,Nsmce2,Wdr5b,Adh5,Taf9b,Wdhd1,Mettl2,Mettl3,Mettl1,Rrs1,Zranb1,Zranb2,Zranb3,Itpa,Tcf7l2,Bloc1s1,Plk…
Adenine	GO:0006807	2696	0.4	0.25	1.6	1.04e-248	2.18e-245	nitrogen compound metabolic process	Gamt,Lactb,Phf5a,Erbb2,Rrp1,Smc6,Vps35,Smc4,Fam98a,Smc3,Fam98b,Rrp9,Smc2,Dus3l,Rrp8,Hmbs,Myc,Hacd2,Naa80,Hacd4,Galt,Pgrmc1,Naxe,Wdr82,Wdr81,Bpnt2,Hus1,Pusl1,Ppox,Ccdc47,Nsun2,Otud7b,Nsun4,Zdhhc7,Nsun6,Zdhhc8,Wdr75,Zdhhc5,Wdr74,Zdhhc6,Mex3d,Zdhhc1,Zdhhc2,Nsmce1,Nsmce2,Wdr5b,Adh5,Taf9b,Wdhd1,Mettl2,Rrs1,Zranb2,Zranb3,Itpa,Tcf7l2,Abtb1,Bloc1s1,Plk4,Lactb2,Phc1,Plk1,Dhcr24,Plk2,Bmpr1a,Sec61b,Ell2,Epr…
DZ	GO:0006807	2082	0.41	0.25	1.64	6.85e-195	1.6e-191	nitrogen compound metabolic process	Phf5a,Psme4,Rrp1,Smc6,Smc5,Smc4,Fam98a,Smc2,Rrp9,Rrp8,Paxip1,Mtap,Hmbs,Myc,Agap3,Hacd2,Naa80,Tent4b,Crnkl1,Naxe,Wdr81,Psmf1,Otud6b,Trim16,Prkcsh,Nsun3,Nsun2,Otud7b,Nsun4,Zdhhc7,Raly,Wdr75,Zdhhc5,Zdhhc6,Mex3d,Zdhhc1,Icmt,Nsmce1,Nsmce3,Wdhd1,Mettl2,Mettl3,Mettl1,Gar1,Rrs1,Zranb2,Itpa,Bloc1s1,Plk4,Lactb2,Plk1,Dhcr24,Plk2,Pdcd11,Bmpr1a,Mms19,Cdk18,Abca1,Cdk16,Pomt1,Abca2,Naa50,Stat5a,Cdk13,Cdk12,Cdk1…
SAM	GO:0071704	3457	0.46	0.29	1.58621	1.39E-313	5.95e-300	organic substance metabolic process	Gamt,Phf5a,Erbb2,Smc6,Vps35,Smc4,Smc3,Rrp9,Smc2,Dus3l,Rrp8,Mtap,Hmbs,Agap3,Tent4b,Galt,Wdr82,Hus1,Pusl1,Chid1,Ccdc47,Ehmt2,Hdhd5,Ehmt1,Wdr75,Wdr74,Pip4k2b,Mex3d,Pip4k2c,Pip4k2a,Wdr5b,Wdhd1,Mettl2,Mettl3,Mettl1,Rrs1,Zranb1,Zranb2,Zranb3,Bloc1s1,Plk4,Plk1,Sec61b,Ell2,Abca1,Tdrkh,Stat5a,Stat5b,Rel,Abca7,Wdr55,Acadsb,Psma4,Psma3,Btg2,Psma6,Btg1,Smg1,Slc27a1,Tcof1,Psma2,Psma1,Rrp12,Peli1,Adm,Rrp15,Smg…
Adenine	GO:0071704	3095	0.46	0.29	1.58621	1.18e-269	4.96e-266	organic substance metabolic process	Gamt,Phf5a,Erbb2,Rrp1,Smc6,Vps35,Smc4,Smc3,Rrp9,Smc2,Dus3l,Rrp8,Hmbs,Galt,Wdr82,Wdr81,Bpnt2,Hus1,Pusl1,Ccdc47,Otud7b,Hdhd5,Wdr75,Wdr74,Pip4k2b,Mex3d,Pip4k2c,Pip4k2a,Wdr5b,Wdhd1,Mettl2,Rrs1,Zranb2,Zranb3,Abtb1,Bloc1s1,Plk4,Plk1,Plk2,Bmpr1a,Sec61b,Ell2,Abca1,Tdrkh,Stat5a,Stat5b,Rel,Wdr55,Acadsb,Btg2,Btg1,Smg1,Slc27a1,Tcof1,Psma2,Rrp12,Adk,Adm,Smg9,Smg7,Smg5,Wdr48,Rpl37rt,Rfk,Rara,Pgam1,Gars,Gart,Wd…
DZ	GO:0071704	2354	0.47	0.29	1.62069	5.7e-198	1.66e-194	organic substance metabolic process	Phf5a,Psme4,Rrp1,Smc6,Smc5,Smc4,Fam98a,Smc2,Rrp9,Rrp8,Paxip1,Mtap,Hmbs,Myc,Agap3,Hacd2,Naa80,Tent4b,Crnkl1,Naxe,Wdr81,Psmf1,Otud6b,Trim16,Fam126a,Chid1,Prkcsh,Nsun3,Nsun2,Otud7b,Nsun4,Zdhhc7,Raly,Wdr75,Zdhhc5,Zdhhc6,Pip4k2c,Mex3d,Zdhhc1,Icmt,Nsmce1,Nsmce3,Mcat,Adh7,Sqle,Wdhd1,Mettl2,Mettl3,Mettl1,Gar1,Rrs1,Zranb2,Itpa,Bloc1s1,Plk4,Lactb2,Plk1,Dhcr24,Plk2,Pdcd11,Bmpr1a,Mms19,Cdk18,Abca1,Cdk16,Pomt…
SAM	GO:0044238	3251	0.43	0.27	1.59259	5.28e-303	1.7e-299	primary metabolic process	Gamt,Phf5a,Erbb2,Smc6,Vps35,Smc4,Smc3,Rrp9,Smc2,Dus3l,Rrp8,Mtap,Hmbs,Agap3,Tent4b,Galt,Wdr82,Hus1,Pusl1,Chid1,Ccdc47,Ehmt2,Hdhd5,Ehmt1,Wdr75,Wdr74,Pip4k2b,Mex3d,Pip4k2c,Pip4k2a,Wdr5b,Wdhd1,Mettl2,Mettl3,Mettl1,Rrs1,Zranb1,Zranb2,Zranb3,Bloc1s1,Plk4,Plk1,Sec61b,Ell2,Abca1,Tdrkh,Stat5a,Stat5b,Abca7,Wdr55,Acadsb,Psma4,Psma3,Btg2,Psma6,Btg1,Smg1,Slc27a1,Tcof1,Psma2,Psma1,Rrp12,Peli1,Adm,Rrp15,Smg7,Sm…
Adenine	GO:0044238	2907	0.43	0.27	1.59259	1.62e-258	4.08e-255	primary metabolic process	Gamt,Lactb,Phf5a,Erbb2,Rrp1,Smc6,Vps35,Smc4,Fam98a,Smc3,Fam98b,Rrp9,Smc2,Dus3l,Rrp8,Hmbs,Myc,Hacd2,Naa80,Hacd4,Galt,Naxe,Wdr82,Wdr81,Bpnt2,Hus1,Pusl1,Fam126a,Ccdc47,Nsun2,Otud7b,Nsun4,Hdhd5,Zdhhc7,Nsun6,Zdhhc8,Wdr75,Zdhhc5,Wdr74,Zdhhc6,Pip4k2b,Mex3d,Pip4k2c,Zdhhc1,Pip4k2a,Zdhhc2,Nsmce1,Nsmce2,Wdr5b,Adh7,Adh5,Taf9b,Sqle,Wdhd1,Mettl2,Rrs1,Zranb2,Zranb3,Itpa,Tcf7l2,Abtb1,Bloc1s1,Plk4,Lactb2,Phc1,Plk…
DZ	GO:0044238	2233	0.44	0.27	1.62963	1.07e-198	4.18e-195	primary metabolic process	Phf5a,Psme4,Rrp1,Smc6,Smc5,Smc4,Fam98a,Smc2,Rrp9,Rrp8,Paxip1,Mtap,Hmbs,Myc,Agap3,Hacd2,Naa80,Tent4b,Crnkl1,Naxe,Wdr81,Psmf1,Otud6b,Trim16,Fam126a,Chid1,Prkcsh,Nsun3,Nsun2,Otud7b,Nsun4,Zdhhc7,Raly,Wdr75,Zdhhc5,Zdhhc6,Pip4k2c,Mex3d,Zdhhc1,Icmt,Nsmce1,Nsmce3,Mcat,Adh7,Sqle,Wdhd1,Mettl2,Mettl3,Mettl1,Gar1,Rrs1,Zranb2,Itpa,Bloc1s1,Plk4,Lactb2,Plk1,Dhcr24,Plk2,Pdcd11,Bmpr1a,Mms19,Cdk18,Abca1,Cdk16,Pomt…
SAM	GO:0006457	103	0.014	0.0063	2.22222	5.68e-21	2.38e-19	protein folding	Cct6a,Cd74,Fkbp1a,Clu,Sh3glb1,Hsp90aa1,Pdia3,Ero1b,Ero1a,Entpd5,Tor1a,Ppih,Ppie,Hspa14,Ppif,Hspa13,Ppic,Gm5160,Ppid,Ppia,Pdia4,Ppib,Prdx4,Grpel2,Grpel1,Mesd,Hsp90ab1,Tbcel,Cwc27,Cdc37,B2m,Nktr,St13,Chchd4,Tbcd,Qsox2,Trap1,Hspb6,Bag1,Tbce,Pdcl,Selenof,Chordc1,Hspa8,Hspa9,Clpx,Hspa4l,Hspa5,Hspa2,Dnajc5,Pfdn6,Mkks,Dnajc7,Pfdn5,Dnajc1,Pfdn2,Dnajc3,Pfdn1,Cryab,Dnlz,Calr,Pdrg1,Hspd1,Cct3,Cct2,Vbp1,Fkbp…
Adenine	GO:0006457	89	0.013	0.0063	2.06349	9.04e-16	2.86e-14	protein folding	Cct6a,Cd74,Hsph1,Mkks,Dnajc7,Pfdn5,Fkbp1a,Pfdn1,Clu,Sh3glb1,Cryab,Pdia3,Ero1b,Ero1a,Entpd5,Ppih,Hspa14,Hspa13,Tor1b,Calr,Ppic,Ppid,Pdrg1,Ppia,Hspd1,Pdia4,Ppib,Cct3,Cct2,Prdx4,Grpel2,Vbp1,Grpel1,Fkbp9,Dnajb11,Mesd,Fkbp4,Fkbp5,Hsp90ab1,Tbcel,Unc45a,Cwc27,Ptges3,Dnajb12,Ptges3l,Tor2a,Tcp1,Cdc37,B2m,Pdcl3,Dnaja3,Dnaja2,St13,Sgta,Chchd4,Hspa1b,Tbcd,Hspa1a,P3h1,Tbca,Qsox2,Trap1,Hspb6,Ppil1,Dnajc25,Bag1…
DZ	GO:0006457	70	0.014	0.0063	2.22222	1.67e-12	6.22e-11	protein folding	Cd74,Hsph1,Pfdn5,Mkks,Pfdn2,Pfdn1,Clu,Sh3glb1,Cryab,Hsp90aa1,Pdia3,Ero1a,Entpd5,Ppig,Dnlz,Ppie,Calr,Tor1b,Ppic,Pdrg1,Pdia4,Hspd1,Ppib,Cct3,Cct2,Prdx4,Grpel2,Grpel1,Fkbp8,Fkbp9,Dnajb11,Mesd,Fkbp5,Hsp90ab1,Unc45a,Tcp1,Ahsa1,Ahsa2,B2m,St13,Chchd4,Sgta,Dnaja1,Tbcd,Hspa1b,Hspa1a,Qsox2,Trap1,Ppil2,Hspb6,Ppil1,Dnajc25,Tbce,Canx,Cct7,Cct4,Dnajb4,Chordc1,Dnajb5,Dnajb2,Dnajc10,Stub1,Hspa8,Hspa9,Clpx,Dnajc1…
DZ	GO:0045088	67	0.013	0.0076	1.71053	5.22e-07	1.03e-05	regulation of innate immune response	H2-T23,Cd74,Rps19,Pspc1,Fam3a,Tyro3,Ikbke,Cactin,Lsm14a,Sfpq,Tbk1,Cgas,Serpinb9,Dhx58,Irgm1,Irgm2,Trafd1,Parp9,Lag3,Lgals9,Mmp2,Tap2,Mul1,Tap1,Zcchc3,Matr3,Adar,Rbm14,Smpdl3b,Irf3,Ifi205,Ifi204,Irf1,Ythdf3,Fadd,Samhd1,Tlr4,Tlr2,Nono,H2-M3,Gfer,Appl2,Prkdc,Mettl3,Mavs,Hmgb1,Ifi211,Hmgb3,Hmgb2,Dusp10,Mndal,Parp14,Polr3d,Cnot7,Lamp1,Polr3b,Polr3c,Polr3g,Nmi,Clec2d,Stat5a,Xrcc5,Nlrc3,Apoe,Nlrc5,Tnfai…
Adenine	GO:0051881	46	0.0069	0.0034	2.02941	6.74e-08	1.1e-06	regulation of mitochondrial membrane potential	Atp5g1,Pink1,Src,Pycr1,Clic1,Abcd1,Rnf122,Spg20,Gclc,Ubb,Ndufs1,Atpif1,Slc25a27,Myc,Parp1,Mfn1,Ndufs4,Bak1,Cdkn2a,Bid,Gclm,Stoml2,Bok,Prdx3,Bad,Got1,Bcl2l1,Rack1,Mtln,Sod1,Mllt11,Gsk3b,Pank2,Prelid1,Ppp2r3c,Mtch2,Ctns,Prkce,Bcl2,Bax,Slc25a33,Park7,Tspo,Arl6ip5,Slc25a36,Tmem135
SAM	GO:0014743	45	0.006	0.0032	1.875	3.87e-07	5.19e-06	regulation of muscle hypertrophy	Fdps,Ep300,Ece1,Pde5a,Lmcd1,Mtor,Jarid2,Tnfrsf1b,Camk2d,Pak1,Igfbp5,Ctdp1,Zfp418,Errfi1,Tnfrsf1a,Glrx3,Parp2,G6pdx,Parp1,Ccn4,Akap6,Slc9a1,Foxo1,Ppp3ca,Mtpn,Fbxo32,Edn1,Cav3,Atp2b4,Tomm70a,Trip10,Igf1,Ptk2,Gsk3b,Lmna,Mef2a,Smad3,Becn1,P2rx4,Smad4,Gsk3a,Notch1,Pin1,Slc25a4,Foxp1
Adenine	GO:0014743	39	0.0058	0.0032	1.8125	1.2e-05	0.000136	regulation of muscle hypertrophy	Fdps,Adk,Ece1,Lmcd1,Mtor,Tnfrsf1b,Igfbp5,Ctdp1,Zfp418,Errfi1,Tnfrsf1a,Glrx3,Parp2,G6pdx,Parp1,Ccn4,Akap6,Slc9a1,Akap1,Foxo1,Ppp3ca,Fbxo32,Edn1,Cav3,Atp2b4,Ddx39b,Tomm70a,Igf1,Yy1,Gsk3b,Lmna,Mef2a,Smad3,P2rx4,Smad4,Gsk3a,Notch1,Prkca,Slc25a4
Adenine	GO:0048608	125	0.019	0.012	1.58333	3e-09	5.63e-08	reproductive structure development	Ermp1,Sgpl1,Adgrg1,Atn1,Ahr,Ctnnb1,Pcyt1b,Crkl,Egln1,Sox2,Gja1,Fgf7,Foxc1,Sox9,Ccn1,Prdx4,Alkbh1,Osr1,Ccnf,Rps6,Hsp90ab1,Patz1,Rxra,Msh2,Serpine2,Serpine1,Gata3,Anxa1,Ube3a,Syde1,Hoxa13,Slc22a5,Insr,Rdh10,Nup107,Tgfb2,Ubb,Kitl,Tiparp,Cited2,Pdgfra,Hmgb2,Hoxa10,Fzd5,Dhcr24,Rtcb,Bmp4,Ggnbp2,Dlg1,Smad4,Ago4,Gjb3,Bcl2,Lhx9,Inhba,Hmga2,Junb,Cul7,Kif18a,Hoxd13,Birc2,Adm,Ybx3,Bcl2l11,Wdr48,Pbrm1,Hey2,Si…
DZ	GO:0009628	318	0.063	0.042	1.5	7.6e-16	3.59e-14	response to abiotic stimulus	App,Ccdc66,Scx,Aqp5,Eif2ak4,Ints7,Elk1,Dynlrb1,Aqp1,Pnp,Tmem109,Prkaa1,Hyou1,Myc,Akt2,Agap3,Sox9,Cirbp,Ier5,Sox4,Uaca,Col1a1,Ddit4,Dag1,Rpl26,Ctns,Prkce,Gata6,Sik1,Thbs1,Arsa,Stac,Chek1,Chek2,Rasa3,Nsmce3,Xpa,Rdh13,Xpc,Hif1a,Prkdc,Mettl3,Ddias,Cited2,Cradd,Myo6,Lgmn,N4bp1,Egr1,Jun,Xbp1,Cpeb1,Jup,Snai2,Synpo,Rad18,Nfkbia,B4galt2,Stx1a,Apobec1,Mylk,Junb,Daxx,Pam,Atr,Ada,Arsb,Cds2,H2aw,Myof,Pawr,Apb…
DZ	GO:0042594	66	0.013	0.0072	1.80556	1.73e-07	3.65e-06	response to starvation	Nuak2,Asns,Eif2ak2,Eif2ak4,Stk24,Angptl4,Pik3c3,Sh3glb1,Mapk3,Rrp8,Comt,Prkaa1,Foxk2,Kptn,Foxo3,Wdr45,Foxo1,Impact,Larp1,Ralb,Zfp36,Ddit3,Cad,Gas2l1,Lars,Ulk1,Ulk2,Mars1,Gabarap,Gas6,Fstl1,Pik3r4,Atf3,Map1lc3a,Fbxo22,Sesn3,Gba,Eif4ebp1,Fads1,Eif2s1,Wipi2,Clec16a,Itfg2,Wipi1,Prkag1,Prkag2,Pck2,Jun,Xbp1,Tbc1d5,Trp53,Lamp2,Atg4b,Acadm,Eif2b1,Eif2a,Srebf2,Flcn,Hspa5,Bcl2,Mybbp1a,Fas,Inhbb,Ripor1,Cdkn…
DZ	GO:0009615	86	0.017	0.0095	1.78947	4.1e-09	1.08e-07	response to virus	Rtp4,Arf1,Rps15a,Fmr1,Eif2ak2,Eif2ak4,Ikbke,Lsm14a,Gli2,Ddx3x,Zmynd11,Tgtp1,Tbk1,Ddx17,Trim34a,Dtx3l,Cgas,Ddx58,Dhx58,Irgm2,Ticam1,Slfn9,Parp9,Ifih1,Serinc5,Lgals8,Ddit4,Pcbp2,Lgals9,Bcl2l1,Aen,Zcchc3,Adar,Ilf3,Bnip3l,Irf3,Irf1,Fadd,Samhd1,Hyal1,Ifit1,Ifit2,Zdhhc1,Tlr3,Ifit3,Oasl2,Cxcl10,Trim25,Uri1,Spon2,Crebzf,Itch,Trim12a,Bnip3,Mavs,G3bp1,Ifit3b,Rrp1b,Zc3hav1,Agbl5,Mov10,Polr3d,Exosc5,Cnot7,Po…
Adenine	GO:0048511	125	0.019	0.011	1.72727	7.87e-12	1.9e-10	rhythmic process	Enox2,Mapk9,Suv39h1,Sgpl1,Erbb2,Pspc1,Nampt,Suv39h2,Ahr,Bhlhe40,Ereg,Mycbp2,Cavin3,Timeless,Ppp1ca,Twist1,Adamts1,Gpr176,Usp2,Fbxw11,Usp7,Egfr,Relb,Prkcg,Noct,Btrc,Anxa1,Atf5,Ube3a,Atf4,Hnrnpu,Nono,Setx,Grk2,Sp1,Gfpt1,Crtc1,Id1,Pdgfra,Id3,Atg7,Btbd9,Grin3a,Egr1,Egr2,Fzd4,Cbx3,Trp53,Prkg2,Igf1,Stat5a,Stat5b,Zfhx3,Cdk5,Hnrnpd,Siah2,Cdk1,Mybbp1a,Inhba,Igf1r,Ddx5,Ogt,Ezh2,Thrap3,Sin3a,Bdnf,Kdm8,Cry1,…
SAM	GO:0048511	132	0.018	0.011	1.63636	9.91e-11	2.07e-09	rhythmic process	Enox2,Mapk9,Suv39h1,Mapk8,Sgpl1,Erbb2,Naglu,Pspc1,Nampt,Suv39h2,Tyro3,Ahr,Clock,Ereg,Mycbp2,Prkaa1,Cavin3,Timeless,Ppp1ca,Twist1,Adamts1,Gpr176,Usp2,Fbxw11,Egfr,Relb,Prkcg,Noct,Arntl2,Sik1,Anxa1,Atf5,Ube3a,Atf4,Hnrnpu,Nono,Setx,Prkdc,Sp1,Mettl3,Gfpt1,Id1,Crem,Pdgfra,Id3,Atg7,Btbd9,Grin3a,Egr1,Egr2,Fzd4,Cbx3,Trp53,Rorc,Rora,Fbxl3,Igf1,Dnm1l,Stat5a,Stat5b,Hnrnpd,Siah2,Cdk1,Mybbp1a,Ddx5,Ogt,Ezh2,Sin…
DZ	GO:0048511	85	0.017	0.011	1.54545	8.77e-06	0.000136	rhythmic process	Enox2,Mapk9,Sgpl1,Naglu,Pspc1,Nampt,Nrip1,Suv39h2,Cry1,Tyro3,Ahr,Hdac3,Rbm4,Sfpq,Dbp,Prkaa1,Timeless,Cyp7b1,Foxo3,Adamts1,Cul4a,Gpr176,Nr1d1,Usp2,Plekha1,Rack1,Ngf,Kdm5c,Egfr,Relb,Prkcg,Maged1,Schip1,Noct,Gas2,Arntl2,Rbm4b,Sik1,Csnk1d,Btrc,Anxa1,Arntl,Atf5,Dtl,Ube3a,Impdh2,Nfya,Mat2a,Nono,Enpp2,Mta1,Prkdc,Mettl3,Sp1,Crtc1,Pdgfra,Id1,Arrb1,Id3,Btbd9,Ppp1cc,Ppp1cb,Egr1,Grin3a,Ahcy,Nfil3,Cbx3,Trp53,…
Adenine	GO:0044281	646	0.096	0.063	1.52381	8.57e-38	6.67e-36	small molecule metabolic process	Gamt,Lars2,Cda,Mecr,Glce,Nampt,Chsy1,Eno1,Eno2,Gls,Scp2,Myc,Suclg2,Shmt1,Entpd7,Hacd2,Hacd4,Pdxk,Galt,Acox1,Naxe,Acox2,Bpnt2,Acox3,Bnip2,Plcg2,Lcat,Fdx1,Hoga1,Far1,Atf4,Atf3,Gne,Rdh11,Glud1,Rdh10,Rdh14,Man1c1,Adh7,Acad11,Adh5,C3,Itpk1,Sqle,Dhfr,Gstm4,Hif1a,Fuca2,Fuca1,Fasn,Qars,Ogdh,Sars2,Itpa,Tcf7l2,Pmm2,Dhcr24,Pmm1,Sfxn1,Sfxn3,Eprs,Fgfr1,Abca1,Stat5a,Stat5b,Adi1,Pcyox1l,Ephx1,Nox4,Fdxr,Nmt1,Tk2…
Adenine	GO:0044403	94	0.014	0.0068	2.05882	1.1e-15	3.46e-14	symbiotic process	Ctsb,Rab7,Rab43,Eif2ak4,Itgav,Nectin1,Nectin2,Bcl2l11,Eea1,Tsg101,Ube2i,Mvb12a,Smarcb1,Myc,Serpinb9,Lrrc15,Irgm1,Mvb12b,Chmp2b,Irgm2,Thoc3,Zfp639,Thoc5,Hspd1,Thoc7,Lamtor5,Cul4a,Creb3,Gbp7,Rraga,Pcbp2,Ist1,Ddx39b,Dag1,Them4,Bcl2l1,Chmp3,Gapdh,Chmp5,Eps15,Mmp9,Hsp90ab1,Chmp6,Rxra,Ulk1,Npc1,Vps4a,Ulk2,Atg16l2,Vps4b,Tcp1,Tbc1d20,Itgb3,Etf1,Gas6,Hcfc1,Tlr2,Slc20a2,AU040320,Tnip1,Pcx,Eif3l,Insr,Eif3f,…
SAM	GO:0044403	99	0.013	0.0068	1.91176	5.7e-15	1.62e-13	symbiotic process	Rab43,Eif2ak4,Nectin1,Nectin2,Ube2i,Mvb12a,Myc,Mvb12b,Chmp2b,Thoc2,Thoc5,Thoc6,Lamtor5,Rraga,Pcbp2,Pcbp1,Ist1,Dag1,Eps15,Hsp90ab1,Rxra,Scarb1,Ulk1,Ulk2,Hcfc1,Insr,Pi4ka,Mon1b,Vps16,Rab5a,Nucks1,Sp1,Usp6nl,Atg7,Ptbp1,Cav2,Trp53,Vta1,Cav1,Ripk1,Kpna2,Nlrx1,Pdcd6ip,Ccnt2,Vcam1,Banf1,Mcts1,Cul1,Chmp1b,Apoe,Ctsb,Rab7,Itgav,Bcl2l11,Eea1,Tsg101,Serpinb9,Lrrc15,Zfp639,Hspd1,Cul4a,Creb3,Them4,Bcl2l1,Chmp3…
DZ	GO:0044403	65	0.013	0.0068	1.91176	2.24e-08	5.36e-07	symbiotic process	Rab43,Denr,Eif2ak4,Itgav,Eea1,Bcl2l11,Tsg101,Chmp2a,Myc,Serpinb9,Lrrc15,Irgm1,Mvb12b,Thoc1,Chmp2b,Irgm2,Hspd1,Thoc7,Lamtor5,Cul4a,Gbp7,Pcbp2,Pcbp1,Ddx39b,Dag1,Bcl2l1,Chmp3,Eps15,Chmp5,Hsp90ab1,Chmp6,Scarb1,Ulk1,Ulk2,Tcp1,Etf1,Gas6,Tlr2,Tnip1,Pcx,Pi4ka,Eif3l,Eif3f,Rab29,Eif3b,Vps16,Uvrag,Nucks1,Sp1,Bak1,Gbp2,Spcs3,Usf1,Trp53,Cav1,Vta1,Kpna6,Pml,Kpna2,Vcam1,Axl,Lrsam1,Banf1,Chmp1b,Apoe
